# Supplementary material for: Genes affecting novel seed constituents in Limnanthes alba Benth: transcriptome analysis of developing embryos and a new genetic map of meadowfoam
Source: PeerJ. 2015 May 19;3:e915. doi: 10.7717/peerj.915 (PMC4451031; doi:10.7717/peerj.915)
Supplement: Table S1 [file peerj-03-915-s002.xls]

## Sheet: Sheet1
Lookup table to interconvert between GenBank and TIGR meadowfoam sequence identifiers
GenBank sequence identifier						TIGR sequence identifier
E.g. MF1_1_A01.b1_F001					equals	MF1A001TV
Lib	Seq run #	Well id.	1st/2nd run			Lib	Seq run #	Well id.	1st/2nd run
MF1_	1	A01	.b1 or .b2	_F001		MF1	A0	01	TV or TVB
MF1_	1	A02	.b1 or .b2	_F001		MF1	A0	02	TV or TVB
MF1_	1	A03	.b1 or .b2	_F001		MF1	A0	03	TV or TVB
MF1_	1	A04	.b1 or .b2	_F001		MF1	A0	04	TV or TVB
MF1_	1	A05	.b1 or .b2	_F001		MF1	A0	05	TV or TVB
MF1_	1	A06	.b1 or .b2	_F001		MF1	A0	06	TV or TVB
MF1_	1	A07	.b1 or .b2	_F001		MF1	A0	07	TV or TVB
MF1_	1	A08	.b1 or .b2	_F001		MF1	A0	08	TV or TVB
MF1_	1	A09	.b1 or .b2	_F001		MF1	A0	09	TV or TVB
MF1_	1	A10	.b1 or .b2	_F001		MF1	A0	10	TV or TVB
MF1_	1	A11	.b1 or .b2	_F001		MF1	A0	11	TV or TVB
MF1_	1	A12	.b1 or .b2	_F001		MF1	A0	12	TV or TVB
MF1_	1	B01	.b1 or .b2	_F001		MF1	A0	13	TV or TVB
MF1_	1	B02	.b1 or .b2	_F001		MF1	A0	14	TV or TVB
MF1_	1	B03	.b1 or .b2	_F001		MF1	A0	15	TV or TVB
MF1_	1	B04	.b1 or .b2	_F001		MF1	A0	16	TV or TVB
MF1_	1	B05	.b1 or .b2	_F001		MF1	A0	17	TV or TVB
MF1_	1	B06	.b1 or .b2	_F001		MF1	A0	18	TV or TVB
MF1_	1	B07	.b1 or .b2	_F001		MF1	A0	19	TV or TVB
MF1_	1	B08	.b1 or .b2	_F001		MF1	A0	20	TV or TVB
MF1_	1	B09	.b1 or .b2	_F001		MF1	A0	21	TV or TVB
MF1_	1	B10	.b1 or .b2	_F001		MF1	A0	22	TV or TVB
MF1_	1	B11	.b1 or .b2	_F001		MF1	A0	23	TV or TVB
MF1_	1	B12	.b1 or .b2	_F001		MF1	A0	24	TV or TVB
MF1_	1	C01	.b1 or .b2	_F001		MF1	A0	25	TV or TVB
MF1_	1	C02	.b1 or .b2	_F001		MF1	A0	26	TV or TVB
MF1_	1	C03	.b1 or .b2	_F001		MF1	A0	27	TV or TVB
MF1_	1	C04	.b1 or .b2	_F001		MF1	A0	28	TV or TVB
MF1_	1	C05	.b1 or .b2	_F001		MF1	A0	29	TV or TVB
MF1_	1	C06	.b1 or .b2	_F001		MF1	A0	30	TV or TVB
MF1_	1	C07	.b1 or .b2	_F001		MF1	A0	31	TV or TVB
MF1_	1	C08	.b1 or .b2	_F001		MF1	A0	32	TV or TVB
MF1_	1	C09	.b1 or .b2	_F001		MF1	A0	33	TV or TVB
MF1_	1	C10	.b1 or .b2	_F001		MF1	A0	34	TV or TVB
MF1_	1	C11	.b1 or .b2	_F001		MF1	A0	35	TV or TVB
MF1_	1	C12	.b1 or .b2	_F001		MF1	A0	36	TV or TVB
MF1_	1	D01	.b1 or .b2	_F001		MF1	A0	37	TV or TVB
MF1_	1	D02	.b1 or .b2	_F001		MF1	A0	38	TV or TVB
MF1_	1	D03	.b1 or .b2	_F001		MF1	A0	39	TV or TVB
MF1_	1	D04	.b1 or .b2	_F001		MF1	A0	40	TV or TVB
MF1_	1	D05	.b1 or .b2	_F001		MF1	A0	41	TV or TVB
MF1_	1	D06	.b1 or .b2	_F001		MF1	A0	42	TV or TVB
MF1_	1	D07	.b1 or .b2	_F001		MF1	A0	43	TV or TVB
MF1_	1	D08	.b1 or .b2	_F001		MF1	A0	44	TV or TVB
MF1_	1	D09	.b1 or .b2	_F001		MF1	A0	45	TV or TVB
MF1_	1	D10	.b1 or .b2	_F001		MF1	A0	46	TV or TVB
MF1_	1	D11	.b1 or .b2	_F001		MF1	A0	47	TV or TVB
MF1_	1	D12	.b1 or .b2	_F001		MF1	A0	48	TV or TVB
MF1_	1	E01	.b1 or .b2	_F001		MF1	A0	49	TV or TVB
MF1_	1	E02	.b1 or .b2	_F001		MF1	A0	50	TV or TVB
MF1_	1	E03	.b1 or .b2	_F001		MF1	A0	51	TV or TVB
MF1_	1	E04	.b1 or .b2	_F001		MF1	A0	52	TV or TVB
MF1_	1	E05	.b1 or .b2	_F001		MF1	A0	53	TV or TVB
MF1_	1	E06	.b1 or .b2	_F001		MF1	A0	54	TV or TVB
MF1_	1	E07	.b1 or .b2	_F001		MF1	A0	55	TV or TVB
MF1_	1	E08	.b1 or .b2	_F001		MF1	A0	56	TV or TVB
MF1_	1	E09	.b1 or .b2	_F001		MF1	A0	57	TV or TVB
MF1_	1	E10	.b1 or .b2	_F001		MF1	A0	58	TV or TVB
MF1_	1	E11	.b1 or .b2	_F001		MF1	A0	59	TV or TVB
MF1_	1	E12	.b1 or .b2	_F001		MF1	A0	60	TV or TVB
MF1_	1	F01	.b1 or .b2	_F001		MF1	A0	61	TV or TVB
MF1_	1	F02	.b1 or .b2	_F001		MF1	A0	62	TV or TVB
MF1_	1	F03	.b1 or .b2	_F001		MF1	A0	63	TV or TVB
MF1_	1	F04	.b1 or .b2	_F001		MF1	A0	64	TV or TVB
MF1_	1	F05	.b1 or .b2	_F001		MF1	A0	65	TV or TVB
MF1_	1	F06	.b1 or .b2	_F001		MF1	A0	66	TV or TVB
MF1_	1	F07	.b1 or .b2	_F001		MF1	A0	67	TV or TVB
MF1_	1	F08	.b1 or .b2	_F001		MF1	A0	68	TV or TVB
MF1_	1	F09	.b1 or .b2	_F001		MF1	A0	69	TV or TVB
MF1_	1	F10	.b1 or .b2	_F001		MF1	A0	70	TV or TVB
MF1_	1	F11	.b1 or .b2	_F001		MF1	A0	71	TV or TVB
MF1_	1	F12	.b1 or .b2	_F001		MF1	A0	72	TV or TVB
MF1_	1	G01	.b1 or .b2	_F001		MF1	A0	73	TV or TVB
MF1_	1	G02	.b1 or .b2	_F001		MF1	A0	74	TV or TVB
MF1_	1	G03	.b1 or .b2	_F001		MF1	A0	75	TV or TVB
MF1_	1	G04	.b1 or .b2	_F001		MF1	A0	76	TV or TVB
MF1_	1	G05	.b1 or .b2	_F001		MF1	A0	77	TV or TVB
MF1_	1	G06	.b1 or .b2	_F001		MF1	A0	78	TV or TVB
MF1_	1	G07	.b1 or .b2	_F001		MF1	A0	79	TV or TVB
MF1_	1	G08	.b1 or .b2	_F001		MF1	A0	80	TV or TVB
MF1_	1	G09	.b1 or .b2	_F001		MF1	A0	81	TV or TVB
MF1_	1	G10	.b1 or .b2	_F001		MF1	A0	82	TV or TVB
MF1_	1	G11	.b1 or .b2	_F001		MF1	A0	83	TV or TVB
MF1_	1	G12	.b1 or .b2	_F001		MF1	A0	84	TV or TVB
MF1_	1	H01	.b1 or .b2	_F001		MF1	A0	85	TV or TVB
MF1_	1	H02	.b1 or .b2	_F001		MF1	A0	86	TV or TVB
MF1_	1	H03	.b1 or .b2	_F001		MF1	A0	87	TV or TVB
MF1_	1	H04	.b1 or .b2	_F001		MF1	A0	88	TV or TVB
MF1_	1	H05	.b1 or .b2	_F001		MF1	A0	89	TV or TVB
MF1_	1	H06	.b1 or .b2	_F001		MF1	A0	90	TV or TVB
MF1_	1	H07	.b1 or .b2	_F001		MF1	A0	91	TV or TVB
MF1_	1	H08	.b1 or .b2	_F001		MF1	A0	92	TV or TVB
MF1_	1	H09	.b1 or .b2	_F001		MF1	A0	93	TV or TVB
MF1_	1	H10	.b1 or .b2	_F001		MF1	A0	94	TV or TVB
MF1_	1	H11	.b1 or .b2	_F001		MF1	A0	95	TV or TVB
MF1_	1	H12	.b1 or .b2	_F001		MF1	A0	96	TV or TVB
MF1_	2	A01	.b1 or .b2	_F001		MF1	A1	01	TV or TVB
MF1_	2	A02	.b1 or .b2	_F001		MF1	A1	02	TV or TVB
MF1_	2	A03	.b1 or .b2	_F001		MF1	A1	03	TV or TVB
MF1_	2	A04	.b1 or .b2	_F001		MF1	A1	04	TV or TVB
MF1_	2	A05	.b1 or .b2	_F001		MF1	A1	05	TV or TVB
MF1_	2	A06	.b1 or .b2	_F001		MF1	A1	06	TV or TVB
MF1_	2	A07	.b1 or .b2	_F001		MF1	A1	07	TV or TVB
MF1_	2	A08	.b1 or .b2	_F001		MF1	A1	08	TV or TVB
MF1_	2	A09	.b1 or .b2	_F001		MF1	A1	09	TV or TVB
MF1_	2	A10	.b1 or .b2	_F001		MF1	A1	10	TV or TVB
MF1_	2	A11	.b1 or .b2	_F001		MF1	A1	11	TV or TVB
MF1_	2	A12	.b1 or .b2	_F001		MF1	A1	12	TV or TVB
MF1_	2	B01	.b1 or .b2	_F001		MF1	A1	13	TV or TVB
MF1_	2	B02	.b1 or .b2	_F001		MF1	A1	14	TV or TVB
MF1_	2	B03	.b1 or .b2	_F001		MF1	A1	15	TV or TVB
MF1_	2	B04	.b1 or .b2	_F001		MF1	A1	16	TV or TVB
MF1_	2	B05	.b1 or .b2	_F001		MF1	A1	17	TV or TVB
MF1_	2	B06	.b1 or .b2	_F001		MF1	A1	18	TV or TVB
MF1_	2	B07	.b1 or .b2	_F001		MF1	A1	19	TV or TVB
MF1_	2	B08	.b1 or .b2	_F001		MF1	A1	20	TV or TVB
MF1_	2	B09	.b1 or .b2	_F001		MF1	A1	21	TV or TVB
MF1_	2	B10	.b1 or .b2	_F001		MF1	A1	22	TV or TVB
MF1_	2	B11	.b1 or .b2	_F001		MF1	A1	23	TV or TVB
MF1_	2	B12	.b1 or .b2	_F001		MF1	A1	24	TV or TVB
MF1_	2	C01	.b1 or .b2	_F001		MF1	A1	25	TV or TVB
MF1_	2	C02	.b1 or .b2	_F001		MF1	A1	26	TV or TVB
MF1_	2	C03	.b1 or .b2	_F001		MF1	A1	27	TV or TVB
MF1_	2	C04	.b1 or .b2	_F001		MF1	A1	28	TV or TVB
MF1_	2	C05	.b1 or .b2	_F001		MF1	A1	29	TV or TVB
MF1_	2	C06	.b1 or .b2	_F001		MF1	A1	30	TV or TVB
MF1_	2	C07	.b1 or .b2	_F001		MF1	A1	31	TV or TVB
MF1_	2	C08	.b1 or .b2	_F001		MF1	A1	32	TV or TVB
MF1_	2	C09	.b1 or .b2	_F001		MF1	A1	33	TV or TVB
MF1_	2	C10	.b1 or .b2	_F001		MF1	A1	34	TV or TVB
MF1_	2	C11	.b1 or .b2	_F001		MF1	A1	35	TV or TVB
MF1_	2	C12	.b1 or .b2	_F001		MF1	A1	36	TV or TVB
MF1_	2	D01	.b1 or .b2	_F001		MF1	A1	37	TV or TVB
MF1_	2	D02	.b1 or .b2	_F001		MF1	A1	38	TV or TVB
MF1_	2	D03	.b1 or .b2	_F001		MF1	A1	39	TV or TVB
MF1_	2	D04	.b1 or .b2	_F001		MF1	A1	40	TV or TVB
MF1_	2	D05	.b1 or .b2	_F001		MF1	A1	41	TV or TVB
MF1_	2	D06	.b1 or .b2	_F001		MF1	A1	42	TV or TVB
MF1_	2	D07	.b1 or .b2	_F001		MF1	A1	43	TV or TVB
MF1_	2	D08	.b1 or .b2	_F001		MF1	A1	44	TV or TVB
MF1_	2	D09	.b1 or .b2	_F001		MF1	A1	45	TV or TVB
MF1_	2	D10	.b1 or .b2	_F001		MF1	A1	46	TV or TVB
MF1_	2	D11	.b1 or .b2	_F001		MF1	A1	47	TV or TVB
MF1_	2	D12	.b1 or .b2	_F001		MF1	A1	48	TV or TVB
MF1_	2	E01	.b1 or .b2	_F001		MF1	A1	49	TV or TVB
MF1_	2	E02	.b1 or .b2	_F001		MF1	A1	50	TV or TVB
MF1_	2	E03	.b1 or .b2	_F001		MF1	A1	51	TV or TVB
MF1_	2	E04	.b1 or .b2	_F001		MF1	A1	52	TV or TVB
MF1_	2	E05	.b1 or .b2	_F001		MF1	A1	53	TV or TVB
MF1_	2	E06	.b1 or .b2	_F001		MF1	A1	54	TV or TVB
MF1_	2	E07	.b1 or .b2	_F001		MF1	A1	55	TV or TVB
MF1_	2	E08	.b1 or .b2	_F001		MF1	A1	56	TV or TVB
MF1_	2	E09	.b1 or .b2	_F001		MF1	A1	57	TV or TVB
MF1_	2	E10	.b1 or .b2	_F001		MF1	A1	58	TV or TVB
MF1_	2	E11	.b1 or .b2	_F001		MF1	A1	59	TV or TVB
MF1_	2	E12	.b1 or .b2	_F001		MF1	A1	60	TV or TVB
MF1_	2	F01	.b1 or .b2	_F001		MF1	A1	61	TV or TVB
MF1_	2	F02	.b1 or .b2	_F001		MF1	A1	62	TV or TVB
MF1_	2	F03	.b1 or .b2	_F001		MF1	A1	63	TV or TVB
MF1_	2	F04	.b1 or .b2	_F001		MF1	A1	64	TV or TVB
MF1_	2	F05	.b1 or .b2	_F001		MF1	A1	65	TV or TVB
MF1_	2	F06	.b1 or .b2	_F001		MF1	A1	66	TV or TVB
MF1_	2	F07	.b1 or .b2	_F001		MF1	A1	67	TV or TVB
MF1_	2	F08	.b1 or .b2	_F001		MF1	A1	68	TV or TVB
MF1_	2	F09	.b1 or .b2	_F001		MF1	A1	69	TV or TVB
MF1_	2	F10	.b1 or .b2	_F001		MF1	A1	70	TV or TVB
MF1_	2	F11	.b1 or .b2	_F001		MF1	A1	71	TV or TVB
MF1_	2	F12	.b1 or .b2	_F001		MF1	A1	72	TV or TVB
MF1_	2	G01	.b1 or .b2	_F001		MF1	A1	73	TV or TVB
MF1_	2	G02	.b1 or .b2	_F001		MF1	A1	74	TV or TVB
MF1_	2	G03	.b1 or .b2	_F001		MF1	A1	75	TV or TVB
MF1_	2	G04	.b1 or .b2	_F001		MF1	A1	76	TV or TVB
MF1_	2	G05	.b1 or .b2	_F001		MF1	A1	77	TV or TVB
MF1_	2	G06	.b1 or .b2	_F001		MF1	A1	78	TV or TVB
MF1_	2	G07	.b1 or .b2	_F001		MF1	A1	79	TV or TVB
MF1_	2	G08	.b1 or .b2	_F001		MF1	A1	80	TV or TVB
MF1_	2	G09	.b1 or .b2	_F001		MF1	A1	81	TV or TVB
MF1_	2	G10	.b1 or .b2	_F001		MF1	A1	82	TV or TVB
MF1_	2	G11	.b1 or .b2	_F001		MF1	A1	83	TV or TVB
MF1_	2	G12	.b1 or .b2	_F001		MF1	A1	84	TV or TVB
MF1_	2	H01	.b1 or .b2	_F001		MF1	A1	85	TV or TVB
MF1_	2	H02	.b1 or .b2	_F001		MF1	A1	86	TV or TVB
MF1_	2	H03	.b1 or .b2	_F001		MF1	A1	87	TV or TVB
MF1_	2	H04	.b1 or .b2	_F001		MF1	A1	88	TV or TVB
MF1_	2	H05	.b1 or .b2	_F001		MF1	A1	89	TV or TVB
MF1_	2	H06	.b1 or .b2	_F001		MF1	A1	90	TV or TVB
MF1_	2	H07	.b1 or .b2	_F001		MF1	A1	91	TV or TVB
MF1_	2	H08	.b1 or .b2	_F001		MF1	A1	92	TV or TVB
MF1_	2	H09	.b1 or .b2	_F001		MF1	A1	93	TV or TVB
MF1_	2	H10	.b1 or .b2	_F001		MF1	A1	94	TV or TVB
MF1_	2	H11	.b1 or .b2	_F001		MF1	A1	95	TV or TVB
MF1_	2	H12	.b1 or .b2	_F001		MF1	A1	96	TV or TVB
MF1_	3	A01	.b1 or .b2	_F001		MF1	A2	01	TV or TVB
MF1_	3	A02	.b1 or .b2	_F001		MF1	A2	02	TV or TVB
MF1_	3	A03	.b1 or .b2	_F001		MF1	A2	03	TV or TVB
MF1_	3	A04	.b1 or .b2	_F001		MF1	A2	04	TV or TVB
MF1_	3	A05	.b1 or .b2	_F001		MF1	A2	05	TV or TVB
MF1_	3	A06	.b1 or .b2	_F001		MF1	A2	06	TV or TVB
MF1_	3	A07	.b1 or .b2	_F001		MF1	A2	07	TV or TVB
MF1_	3	A08	.b1 or .b2	_F001		MF1	A2	08	TV or TVB
MF1_	3	A09	.b1 or .b2	_F001		MF1	A2	09	TV or TVB
MF1_	3	A10	.b1 or .b2	_F001		MF1	A2	10	TV or TVB
MF1_	3	A11	.b1 or .b2	_F001		MF1	A2	11	TV or TVB
MF1_	3	A12	.b1 or .b2	_F001		MF1	A2	12	TV or TVB
MF1_	3	B01	.b1 or .b2	_F001		MF1	A2	13	TV or TVB
MF1_	3	B02	.b1 or .b2	_F001		MF1	A2	14	TV or TVB
MF1_	3	B03	.b1 or .b2	_F001		MF1	A2	15	TV or TVB
MF1_	3	B04	.b1 or .b2	_F001		MF1	A2	16	TV or TVB
MF1_	3	B05	.b1 or .b2	_F001		MF1	A2	17	TV or TVB
MF1_	3	B06	.b1 or .b2	_F001		MF1	A2	18	TV or TVB
MF1_	3	B07	.b1 or .b2	_F001		MF1	A2	19	TV or TVB
MF1_	3	B08	.b1 or .b2	_F001		MF1	A2	20	TV or TVB
MF1_	3	B09	.b1 or .b2	_F001		MF1	A2	21	TV or TVB
MF1_	3	B10	.b1 or .b2	_F001		MF1	A2	22	TV or TVB
MF1_	3	B11	.b1 or .b2	_F001		MF1	A2	23	TV or TVB
MF1_	3	B12	.b1 or .b2	_F001		MF1	A2	24	TV or TVB
MF1_	3	C01	.b1 or .b2	_F001		MF1	A2	25	TV or TVB
MF1_	3	C02	.b1 or .b2	_F001		MF1	A2	26	TV or TVB
MF1_	3	C03	.b1 or .b2	_F001		MF1	A2	27	TV or TVB
MF1_	3	C04	.b1 or .b2	_F001		MF1	A2	28	TV or TVB
MF1_	3	C05	.b1 or .b2	_F001		MF1	A2	29	TV or TVB
MF1_	3	C06	.b1 or .b2	_F001		MF1	A2	30	TV or TVB
MF1_	3	C07	.b1 or .b2	_F001		MF1	A2	31	TV or TVB
MF1_	3	C08	.b1 or .b2	_F001		MF1	A2	32	TV or TVB
MF1_	3	C09	.b1 or .b2	_F001		MF1	A2	33	TV or TVB
MF1_	3	C10	.b1 or .b2	_F001		MF1	A2	34	TV or TVB
MF1_	3	C11	.b1 or .b2	_F001		MF1	A2	35	TV or TVB
MF1_	3	C12	.b1 or .b2	_F001		MF1	A2	36	TV or TVB
MF1_	3	D01	.b1 or .b2	_F001		MF1	A2	37	TV or TVB
MF1_	3	D02	.b1 or .b2	_F001		MF1	A2	38	TV or TVB
MF1_	3	D03	.b1 or .b2	_F001		MF1	A2	39	TV or TVB
MF1_	3	D04	.b1 or .b2	_F001		MF1	A2	40	TV or TVB
MF1_	3	D05	.b1 or .b2	_F001		MF1	A2	41	TV or TVB
MF1_	3	D06	.b1 or .b2	_F001		MF1	A2	42	TV or TVB
MF1_	3	D07	.b1 or .b2	_F001		MF1	A2	43	TV or TVB
MF1_	3	D08	.b1 or .b2	_F001		MF1	A2	44	TV or TVB
MF1_	3	D09	.b1 or .b2	_F001		MF1	A2	45	TV or TVB
MF1_	3	D10	.b1 or .b2	_F001		MF1	A2	46	TV or TVB
MF1_	3	D11	.b1 or .b2	_F001		MF1	A2	47	TV or TVB
MF1_	3	D12	.b1 or .b2	_F001		MF1	A2	48	TV or TVB
MF1_	3	E01	.b1 or .b2	_F001		MF1	A2	49	TV or TVB
MF1_	3	E02	.b1 or .b2	_F001		MF1	A2	50	TV or TVB
MF1_	3	E03	.b1 or .b2	_F001		MF1	A2	51	TV or TVB
MF1_	3	E04	.b1 or .b2	_F001		MF1	A2	52	TV or TVB
MF1_	3	E05	.b1 or .b2	_F001		MF1	A2	53	TV or TVB
MF1_	3	E06	.b1 or .b2	_F001		MF1	A2	54	TV or TVB
MF1_	3	E07	.b1 or .b2	_F001		MF1	A2	55	TV or TVB
MF1_	3	E08	.b1 or .b2	_F001		MF1	A2	56	TV or TVB
MF1_	3	E09	.b1 or .b2	_F001		MF1	A2	57	TV or TVB
MF1_	3	E10	.b1 or .b2	_F001		MF1	A2	58	TV or TVB
MF1_	3	E11	.b1 or .b2	_F001		MF1	A2	59	TV or TVB
MF1_	3	E12	.b1 or .b2	_F001		MF1	A2	60	TV or TVB
MF1_	3	F01	.b1 or .b2	_F001		MF1	A2	61	TV or TVB
MF1_	3	F02	.b1 or .b2	_F001		MF1	A2	62	TV or TVB
MF1_	3	F03	.b1 or .b2	_F001		MF1	A2	63	TV or TVB
MF1_	3	F04	.b1 or .b2	_F001		MF1	A2	64	TV or TVB
MF1_	3	F05	.b1 or .b2	_F001		MF1	A2	65	TV or TVB
MF1_	3	F06	.b1 or .b2	_F001		MF1	A2	66	TV or TVB
MF1_	3	F07	.b1 or .b2	_F001		MF1	A2	67	TV or TVB
MF1_	3	F08	.b1 or .b2	_F001		MF1	A2	68	TV or TVB
MF1_	3	F09	.b1 or .b2	_F001		MF1	A2	69	TV or TVB
MF1_	3	F10	.b1 or .b2	_F001		MF1	A2	70	TV or TVB
MF1_	3	F11	.b1 or .b2	_F001		MF1	A2	71	TV or TVB
MF1_	3	F12	.b1 or .b2	_F001		MF1	A2	72	TV or TVB
MF1_	3	G01	.b1 or .b2	_F001		MF1	A2	73	TV or TVB
MF1_	3	G02	.b1 or .b2	_F001		MF1	A2	74	TV or TVB
MF1_	3	G03	.b1 or .b2	_F001		MF1	A2	75	TV or TVB
MF1_	3	G04	.b1 or .b2	_F001		MF1	A2	76	TV or TVB
MF1_	3	G05	.b1 or .b2	_F001		MF1	A2	77	TV or TVB
MF1_	3	G06	.b1 or .b2	_F001		MF1	A2	78	TV or TVB
MF1_	3	G07	.b1 or .b2	_F001		MF1	A2	79	TV or TVB
MF1_	3	G08	.b1 or .b2	_F001		MF1	A2	80	TV or TVB
MF1_	3	G09	.b1 or .b2	_F001		MF1	A2	81	TV or TVB
MF1_	3	G10	.b1 or .b2	_F001		MF1	A2	82	TV or TVB
MF1_	3	G11	.b1 or .b2	_F001		MF1	A2	83	TV or TVB
MF1_	3	G12	.b1 or .b2	_F001		MF1	A2	84	TV or TVB
MF1_	3	H01	.b1 or .b2	_F001		MF1	A2	85	TV or TVB
MF1_	3	H02	.b1 or .b2	_F001		MF1	A2	86	TV or TVB
MF1_	3	H03	.b1 or .b2	_F001		MF1	A2	87	TV or TVB
MF1_	3	H04	.b1 or .b2	_F001		MF1	A2	88	TV or TVB
MF1_	3	H05	.b1 or .b2	_F001		MF1	A2	89	TV or TVB
MF1_	3	H06	.b1 or .b2	_F001		MF1	A2	90	TV or TVB
MF1_	3	H07	.b1 or .b2	_F001		MF1	A2	91	TV or TVB
MF1_	3	H08	.b1 or .b2	_F001		MF1	A2	92	TV or TVB
MF1_	3	H09	.b1 or .b2	_F001		MF1	A2	93	TV or TVB
MF1_	3	H10	.b1 or .b2	_F001		MF1	A2	94	TV or TVB
MF1_	3	H11	.b1 or .b2	_F001		MF1	A2	95	TV or TVB
MF1_	3	H12	.b1 or .b2	_F001		MF1	A2	96	TV or TVB
MF1_	4	A01	.b1 or .b2	_F001		MF1	A3	01	TV or TVB
MF1_	4	A02	.b1 or .b2	_F001		MF1	A3	02	TV or TVB
MF1_	4	A03	.b1 or .b2	_F001		MF1	A3	03	TV or TVB
MF1_	4	A04	.b1 or .b2	_F001		MF1	A3	04	TV or TVB
MF1_	4	A05	.b1 or .b2	_F001		MF1	A3	05	TV or TVB
MF1_	4	A06	.b1 or .b2	_F001		MF1	A3	06	TV or TVB
MF1_	4	A07	.b1 or .b2	_F001		MF1	A3	07	TV or TVB
MF1_	4	A08	.b1 or .b2	_F001		MF1	A3	08	TV or TVB
MF1_	4	A09	.b1 or .b2	_F001		MF1	A3	09	TV or TVB
MF1_	4	A10	.b1 or .b2	_F001		MF1	A3	10	TV or TVB
MF1_	4	A11	.b1 or .b2	_F001		MF1	A3	11	TV or TVB
MF1_	4	A12	.b1 or .b2	_F001		MF1	A3	12	TV or TVB
MF1_	4	B01	.b1 or .b2	_F001		MF1	A3	13	TV or TVB
MF1_	4	B02	.b1 or .b2	_F001		MF1	A3	14	TV or TVB
MF1_	4	B03	.b1 or .b2	_F001		MF1	A3	15	TV or TVB
MF1_	4	B04	.b1 or .b2	_F001		MF1	A3	16	TV or TVB
MF1_	4	B05	.b1 or .b2	_F001		MF1	A3	17	TV or TVB
MF1_	4	B06	.b1 or .b2	_F001		MF1	A3	18	TV or TVB
MF1_	4	B07	.b1 or .b2	_F001		MF1	A3	19	TV or TVB
MF1_	4	B08	.b1 or .b2	_F001		MF1	A3	20	TV or TVB
MF1_	4	B09	.b1 or .b2	_F001		MF1	A3	21	TV or TVB
MF1_	4	B10	.b1 or .b2	_F001		MF1	A3	22	TV or TVB
MF1_	4	B11	.b1 or .b2	_F001		MF1	A3	23	TV or TVB
MF1_	4	B12	.b1 or .b2	_F001		MF1	A3	24	TV or TVB
MF1_	4	C01	.b1 or .b2	_F001		MF1	A3	25	TV or TVB
MF1_	4	C02	.b1 or .b2	_F001		MF1	A3	26	TV or TVB
MF1_	4	C03	.b1 or .b2	_F001		MF1	A3	27	TV or TVB
MF1_	4	C04	.b1 or .b2	_F001		MF1	A3	28	TV or TVB
MF1_	4	C05	.b1 or .b2	_F001		MF1	A3	29	TV or TVB
MF1_	4	C06	.b1 or .b2	_F001		MF1	A3	30	TV or TVB
MF1_	4	C07	.b1 or .b2	_F001		MF1	A3	31	TV or TVB
MF1_	4	C08	.b1 or .b2	_F001		MF1	A3	32	TV or TVB
MF1_	4	C09	.b1 or .b2	_F001		MF1	A3	33	TV or TVB
MF1_	4	C10	.b1 or .b2	_F001		MF1	A3	34	TV or TVB
MF1_	4	C11	.b1 or .b2	_F001		MF1	A3	35	TV or TVB
MF1_	4	C12	.b1 or .b2	_F001		MF1	A3	36	TV or TVB
MF1_	4	D01	.b1 or .b2	_F001		MF1	A3	37	TV or TVB
MF1_	4	D02	.b1 or .b2	_F001		MF1	A3	38	TV or TVB
MF1_	4	D03	.b1 or .b2	_F001		MF1	A3	39	TV or TVB
MF1_	4	D04	.b1 or .b2	_F001		MF1	A3	40	TV or TVB
MF1_	4	D05	.b1 or .b2	_F001		MF1	A3	41	TV or TVB
MF1_	4	D06	.b1 or .b2	_F001		MF1	A3	42	TV or TVB
MF1_	4	D07	.b1 or .b2	_F001		MF1	A3	43	TV or TVB
MF1_	4	D08	.b1 or .b2	_F001		MF1	A3	44	TV or TVB
MF1_	4	D09	.b1 or .b2	_F001		MF1	A3	45	TV or TVB
MF1_	4	D10	.b1 or .b2	_F001		MF1	A3	46	TV or TVB
MF1_	4	D11	.b1 or .b2	_F001		MF1	A3	47	TV or TVB
MF1_	4	D12	.b1 or .b2	_F001		MF1	A3	48	TV or TVB
MF1_	4	E01	.b1 or .b2	_F001		MF1	A3	49	TV or TVB
MF1_	4	E02	.b1 or .b2	_F001		MF1	A3	50	TV or TVB
MF1_	4	E03	.b1 or .b2	_F001		MF1	A3	51	TV or TVB
MF1_	4	E04	.b1 or .b2	_F001		MF1	A3	52	TV or TVB
MF1_	4	E05	.b1 or .b2	_F001		MF1	A3	53	TV or TVB
MF1_	4	E06	.b1 or .b2	_F001		MF1	A3	54	TV or TVB
MF1_	4	E07	.b1 or .b2	_F001		MF1	A3	55	TV or TVB
MF1_	4	E08	.b1 or .b2	_F001		MF1	A3	56	TV or TVB
MF1_	4	E09	.b1 or .b2	_F001		MF1	A3	57	TV or TVB
MF1_	4	E10	.b1 or .b2	_F001		MF1	A3	58	TV or TVB
MF1_	4	E11	.b1 or .b2	_F001		MF1	A3	59	TV or TVB
MF1_	4	E12	.b1 or .b2	_F001		MF1	A3	60	TV or TVB
MF1_	4	F01	.b1 or .b2	_F001		MF1	A3	61	TV or TVB
MF1_	4	F02	.b1 or .b2	_F001		MF1	A3	62	TV or TVB
MF1_	4	F03	.b1 or .b2	_F001		MF1	A3	63	TV or TVB
MF1_	4	F04	.b1 or .b2	_F001		MF1	A3	64	TV or TVB
MF1_	4	F05	.b1 or .b2	_F001		MF1	A3	65	TV or TVB
MF1_	4	F06	.b1 or .b2	_F001		MF1	A3	66	TV or TVB
MF1_	4	F07	.b1 or .b2	_F001		MF1	A3	67	TV or TVB
MF1_	4	F08	.b1 or .b2	_F001		MF1	A3	68	TV or TVB
MF1_	4	F09	.b1 or .b2	_F001		MF1	A3	69	TV or TVB
MF1_	4	F10	.b1 or .b2	_F001		MF1	A3	70	TV or TVB
MF1_	4	F11	.b1 or .b2	_F001		MF1	A3	71	TV or TVB
MF1_	4	F12	.b1 or .b2	_F001		MF1	A3	72	TV or TVB
MF1_	4	G01	.b1 or .b2	_F001		MF1	A3	73	TV or TVB
MF1_	4	G02	.b1 or .b2	_F001		MF1	A3	74	TV or TVB
MF1_	4	G03	.b1 or .b2	_F001		MF1	A3	75	TV or TVB
MF1_	4	G04	.b1 or .b2	_F001		MF1	A3	76	TV or TVB
MF1_	4	G05	.b1 or .b2	_F001		MF1	A3	77	TV or TVB
MF1_	4	G06	.b1 or .b2	_F001		MF1	A3	78	TV or TVB
MF1_	4	G07	.b1 or .b2	_F001		MF1	A3	79	TV or TVB
MF1_	4	G08	.b1 or .b2	_F001		MF1	A3	80	TV or TVB
MF1_	4	G09	.b1 or .b2	_F001		MF1	A3	81	TV or TVB
MF1_	4	G10	.b1 or .b2	_F001		MF1	A3	82	TV or TVB
MF1_	4	G11	.b1 or .b2	_F001		MF1	A3	83	TV or TVB
MF1_	4	G12	.b1 or .b2	_F001		MF1	A3	84	TV or TVB
MF1_	4	H01	.b1 or .b2	_F001		MF1	A3	85	TV or TVB
MF1_	4	H02	.b1 or .b2	_F001		MF1	A3	86	TV or TVB
MF1_	4	H03	.b1 or .b2	_F001		MF1	A3	87	TV or TVB
MF1_	4	H04	.b1 or .b2	_F001		MF1	A3	88	TV or TVB
MF1_	4	H05	.b1 or .b2	_F001		MF1	A3	89	TV or TVB
MF1_	4	H06	.b1 or .b2	_F001		MF1	A3	90	TV or TVB
MF1_	4	H07	.b1 or .b2	_F001		MF1	A3	91	TV or TVB
MF1_	4	H08	.b1 or .b2	_F001		MF1	A3	92	TV or TVB
MF1_	4	H09	.b1 or .b2	_F001		MF1	A3	93	TV or TVB
MF1_	4	H10	.b1 or .b2	_F001		MF1	A3	94	TV or TVB
MF1_	4	H11	.b1 or .b2	_F001		MF1	A3	95	TV or TVB
MF1_	4	H12	.b1 or .b2	_F001		MF1	A3	96	TV or TVB
MF1_	5	A01	.b1 or .b2	_F001		MF1	A4	01	TV or TVB
MF1_	5	A02	.b1 or .b2	_F001		MF1	A4	02	TV or TVB
MF1_	5	A03	.b1 or .b2	_F001		MF1	A4	03	TV or TVB
MF1_	5	A04	.b1 or .b2	_F001		MF1	A4	04	TV or TVB
MF1_	5	A05	.b1 or .b2	_F001		MF1	A4	05	TV or TVB
MF1_	5	A06	.b1 or .b2	_F001		MF1	A4	06	TV or TVB
MF1_	5	A07	.b1 or .b2	_F001		MF1	A4	07	TV or TVB
MF1_	5	A08	.b1 or .b2	_F001		MF1	A4	08	TV or TVB
MF1_	5	A09	.b1 or .b2	_F001		MF1	A4	09	TV or TVB
MF1_	5	A10	.b1 or .b2	_F001		MF1	A4	10	TV or TVB
MF1_	5	A11	.b1 or .b2	_F001		MF1	A4	11	TV or TVB
MF1_	5	A12	.b1 or .b2	_F001		MF1	A4	12	TV or TVB
MF1_	5	B01	.b1 or .b2	_F001		MF1	A4	13	TV or TVB
MF1_	5	B02	.b1 or .b2	_F001		MF1	A4	14	TV or TVB
MF1_	5	B03	.b1 or .b2	_F001		MF1	A4	15	TV or TVB
MF1_	5	B04	.b1 or .b2	_F001		MF1	A4	16	TV or TVB
MF1_	5	B05	.b1 or .b2	_F001		MF1	A4	17	TV or TVB
MF1_	5	B06	.b1 or .b2	_F001		MF1	A4	18	TV or TVB
MF1_	5	B07	.b1 or .b2	_F001		MF1	A4	19	TV or TVB
MF1_	5	B08	.b1 or .b2	_F001		MF1	A4	20	TV or TVB
MF1_	5	B09	.b1 or .b2	_F001		MF1	A4	21	TV or TVB
MF1_	5	B10	.b1 or .b2	_F001		MF1	A4	22	TV or TVB
MF1_	5	B11	.b1 or .b2	_F001		MF1	A4	23	TV or TVB
MF1_	5	B12	.b1 or .b2	_F001		MF1	A4	24	TV or TVB
MF1_	5	C01	.b1 or .b2	_F001		MF1	A4	25	TV or TVB
MF1_	5	C02	.b1 or .b2	_F001		MF1	A4	26	TV or TVB
MF1_	5	C03	.b1 or .b2	_F001		MF1	A4	27	TV or TVB
MF1_	5	C04	.b1 or .b2	_F001		MF1	A4	28	TV or TVB
MF1_	5	C05	.b1 or .b2	_F001		MF1	A4	29	TV or TVB
MF1_	5	C06	.b1 or .b2	_F001		MF1	A4	30	TV or TVB
MF1_	5	C07	.b1 or .b2	_F001		MF1	A4	31	TV or TVB
MF1_	5	C08	.b1 or .b2	_F001		MF1	A4	32	TV or TVB
MF1_	5	C09	.b1 or .b2	_F001		MF1	A4	33	TV or TVB
MF1_	5	C10	.b1 or .b2	_F001		MF1	A4	34	TV or TVB
MF1_	5	C11	.b1 or .b2	_F001		MF1	A4	35	TV or TVB
MF1_	5	C12	.b1 or .b2	_F001		MF1	A4	36	TV or TVB
MF1_	5	D01	.b1 or .b2	_F001		MF1	A4	37	TV or TVB
MF1_	5	D02	.b1 or .b2	_F001		MF1	A4	38	TV or TVB
MF1_	5	D03	.b1 or .b2	_F001		MF1	A4	39	TV or TVB
MF1_	5	D04	.b1 or .b2	_F001		MF1	A4	40	TV or TVB
MF1_	5	D05	.b1 or .b2	_F001		MF1	A4	41	TV or TVB
MF1_	5	D06	.b1 or .b2	_F001		MF1	A4	42	TV or TVB
MF1_	5	D07	.b1 or .b2	_F001		MF1	A4	43	TV or TVB
MF1_	5	D08	.b1 or .b2	_F001		MF1	A4	44	TV or TVB
MF1_	5	D09	.b1 or .b2	_F001		MF1	A4	45	TV or TVB
MF1_	5	D10	.b1 or .b2	_F001		MF1	A4	46	TV or TVB
MF1_	5	D11	.b1 or .b2	_F001		MF1	A4	47	TV or TVB
MF1_	5	D12	.b1 or .b2	_F001		MF1	A4	48	TV or TVB
MF1_	5	E01	.b1 or .b2	_F001		MF1	A4	49	TV or TVB
MF1_	5	E02	.b1 or .b2	_F001		MF1	A4	50	TV or TVB
MF1_	5	E03	.b1 or .b2	_F001		MF1	A4	51	TV or TVB
MF1_	5	E04	.b1 or .b2	_F001		MF1	A4	52	TV or TVB
MF1_	5	E05	.b1 or .b2	_F001		MF1	A4	53	TV or TVB
MF1_	5	E06	.b1 or .b2	_F001		MF1	A4	54	TV or TVB
MF1_	5	E07	.b1 or .b2	_F001		MF1	A4	55	TV or TVB
MF1_	5	E08	.b1 or .b2	_F001		MF1	A4	56	TV or TVB
MF1_	5	E09	.b1 or .b2	_F001		MF1	A4	57	TV or TVB
MF1_	5	E10	.b1 or .b2	_F001		MF1	A4	58	TV or TVB
MF1_	5	E11	.b1 or .b2	_F001		MF1	A4	59	TV or TVB
MF1_	5	E12	.b1 or .b2	_F001		MF1	A4	60	TV or TVB
MF1_	5	F01	.b1 or .b2	_F001		MF1	A4	61	TV or TVB
MF1_	5	F02	.b1 or .b2	_F001		MF1	A4	62	TV or TVB
MF1_	5	F03	.b1 or .b2	_F001		MF1	A4	63	TV or TVB
MF1_	5	F04	.b1 or .b2	_F001		MF1	A4	64	TV or TVB
MF1_	5	F05	.b1 or .b2	_F001		MF1	A4	65	TV or TVB
MF1_	5	F06	.b1 or .b2	_F001		MF1	A4	66	TV or TVB
MF1_	5	F07	.b1 or .b2	_F001		MF1	A4	67	TV or TVB
MF1_	5	F08	.b1 or .b2	_F001		MF1	A4	68	TV or TVB
MF1_	5	F09	.b1 or .b2	_F001		MF1	A4	69	TV or TVB
MF1_	5	F10	.b1 or .b2	_F001		MF1	A4	70	TV or TVB
MF1_	5	F11	.b1 or .b2	_F001		MF1	A4	71	TV or TVB
MF1_	5	F12	.b1 or .b2	_F001		MF1	A4	72	TV or TVB
MF1_	5	G01	.b1 or .b2	_F001		MF1	A4	73	TV or TVB
MF1_	5	G02	.b1 or .b2	_F001		MF1	A4	74	TV or TVB
MF1_	5	G03	.b1 or .b2	_F001		MF1	A4	75	TV or TVB
MF1_	5	G04	.b1 or .b2	_F001		MF1	A4	76	TV or TVB
MF1_	5	G05	.b1 or .b2	_F001		MF1	A4	77	TV or TVB
MF1_	5	G06	.b1 or .b2	_F001		MF1	A4	78	TV or TVB
MF1_	5	G07	.b1 or .b2	_F001		MF1	A4	79	TV or TVB
MF1_	5	G08	.b1 or .b2	_F001		MF1	A4	80	TV or TVB
MF1_	5	G09	.b1 or .b2	_F001		MF1	A4	81	TV or TVB
MF1_	5	G10	.b1 or .b2	_F001		MF1	A4	82	TV or TVB
MF1_	5	G11	.b1 or .b2	_F001		MF1	A4	83	TV or TVB
MF1_	5	G12	.b1 or .b2	_F001		MF1	A4	84	TV or TVB
MF1_	5	H01	.b1 or .b2	_F001		MF1	A4	85	TV or TVB
MF1_	5	H02	.b1 or .b2	_F001		MF1	A4	86	TV or TVB
MF1_	5	H03	.b1 or .b2	_F001		MF1	A4	87	TV or TVB
MF1_	5	H04	.b1 or .b2	_F001		MF1	A4	88	TV or TVB
MF1_	5	H05	.b1 or .b2	_F001		MF1	A4	89	TV or TVB
MF1_	5	H06	.b1 or .b2	_F001		MF1	A4	90	TV or TVB
MF1_	5	H07	.b1 or .b2	_F001		MF1	A4	91	TV or TVB
MF1_	5	H08	.b1 or .b2	_F001		MF1	A4	92	TV or TVB
MF1_	5	H09	.b1 or .b2	_F001		MF1	A4	93	TV or TVB
MF1_	5	H10	.b1 or .b2	_F001		MF1	A4	94	TV or TVB
MF1_	5	H11	.b1 or .b2	_F001		MF1	A4	95	TV or TVB
MF1_	5	H12	.b1 or .b2	_F001		MF1	A4	96	TV or TVB
MF1_	6	A01	.b1 or .b2	_F001		MF1	A5	01	TV or TVB
MF1_	6	A02	.b1 or .b2	_F001		MF1	A5	02	TV or TVB
MF1_	6	A03	.b1 or .b2	_F001		MF1	A5	03	TV or TVB
MF1_	6	A04	.b1 or .b2	_F001		MF1	A5	04	TV or TVB
MF1_	6	A05	.b1 or .b2	_F001		MF1	A5	05	TV or TVB
MF1_	6	A06	.b1 or .b2	_F001		MF1	A5	06	TV or TVB
MF1_	6	A07	.b1 or .b2	_F001		MF1	A5	07	TV or TVB
MF1_	6	A08	.b1 or .b2	_F001		MF1	A5	08	TV or TVB
MF1_	6	A09	.b1 or .b2	_F001		MF1	A5	09	TV or TVB
MF1_	6	A10	.b1 or .b2	_F001		MF1	A5	10	TV or TVB
MF1_	6	A11	.b1 or .b2	_F001		MF1	A5	11	TV or TVB
MF1_	6	A12	.b1 or .b2	_F001		MF1	A5	12	TV or TVB
MF1_	6	B01	.b1 or .b2	_F001		MF1	A5	13	TV or TVB
MF1_	6	B02	.b1 or .b2	_F001		MF1	A5	14	TV or TVB
MF1_	6	B03	.b1 or .b2	_F001		MF1	A5	15	TV or TVB
MF1_	6	B04	.b1 or .b2	_F001		MF1	A5	16	TV or TVB
MF1_	6	B05	.b1 or .b2	_F001		MF1	A5	17	TV or TVB
MF1_	6	B06	.b1 or .b2	_F001		MF1	A5	18	TV or TVB
MF1_	6	B07	.b1 or .b2	_F001		MF1	A5	19	TV or TVB
MF1_	6	B08	.b1 or .b2	_F001		MF1	A5	20	TV or TVB
MF1_	6	B09	.b1 or .b2	_F001		MF1	A5	21	TV or TVB
MF1_	6	B10	.b1 or .b2	_F001		MF1	A5	22	TV or TVB
MF1_	6	B11	.b1 or .b2	_F001		MF1	A5	23	TV or TVB
MF1_	6	B12	.b1 or .b2	_F001		MF1	A5	24	TV or TVB
MF1_	6	C01	.b1 or .b2	_F001		MF1	A5	25	TV or TVB
MF1_	6	C02	.b1 or .b2	_F001		MF1	A5	26	TV or TVB
MF1_	6	C03	.b1 or .b2	_F001		MF1	A5	27	TV or TVB
MF1_	6	C04	.b1 or .b2	_F001		MF1	A5	28	TV or TVB
MF1_	6	C05	.b1 or .b2	_F001		MF1	A5	29	TV or TVB
MF1_	6	C06	.b1 or .b2	_F001		MF1	A5	30	TV or TVB
MF1_	6	C07	.b1 or .b2	_F001		MF1	A5	31	TV or TVB
MF1_	6	C08	.b1 or .b2	_F001		MF1	A5	32	TV or TVB
MF1_	6	C09	.b1 or .b2	_F001		MF1	A5	33	TV or TVB
MF1_	6	C10	.b1 or .b2	_F001		MF1	A5	34	TV or TVB
MF1_	6	C11	.b1 or .b2	_F001		MF1	A5	35	TV or TVB
MF1_	6	C12	.b1 or .b2	_F001		MF1	A5	36	TV or TVB
MF1_	6	D01	.b1 or .b2	_F001		MF1	A5	37	TV or TVB
MF1_	6	D02	.b1 or .b2	_F001		MF1	A5	38	TV or TVB
MF1_	6	D03	.b1 or .b2	_F001		MF1	A5	39	TV or TVB
MF1_	6	D04	.b1 or .b2	_F001		MF1	A5	40	TV or TVB
MF1_	6	D05	.b1 or .b2	_F001		MF1	A5	41	TV or TVB
MF1_	6	D06	.b1 or .b2	_F001		MF1	A5	42	TV or TVB
MF1_	6	D07	.b1 or .b2	_F001		MF1	A5	43	TV or TVB
MF1_	6	D08	.b1 or .b2	_F001		MF1	A5	44	TV or TVB
MF1_	6	D09	.b1 or .b2	_F001		MF1	A5	45	TV or TVB
MF1_	6	D10	.b1 or .b2	_F001		MF1	A5	46	TV or TVB
MF1_	6	D11	.b1 or .b2	_F001		MF1	A5	47	TV or TVB
MF1_	6	D12	.b1 or .b2	_F001		MF1	A5	48	TV or TVB
MF1_	6	E01	.b1 or .b2	_F001		MF1	A5	49	TV or TVB
MF1_	6	E02	.b1 or .b2	_F001		MF1	A5	50	TV or TVB
MF1_	6	E03	.b1 or .b2	_F001		MF1	A5	51	TV or TVB
MF1_	6	E04	.b1 or .b2	_F001		MF1	A5	52	TV or TVB
MF1_	6	E05	.b1 or .b2	_F001		MF1	A5	53	TV or TVB
MF1_	6	E06	.b1 or .b2	_F001		MF1	A5	54	TV or TVB
MF1_	6	E07	.b1 or .b2	_F001		MF1	A5	55	TV or TVB
MF1_	6	E08	.b1 or .b2	_F001		MF1	A5	56	TV or TVB
MF1_	6	E09	.b1 or .b2	_F001		MF1	A5	57	TV or TVB
MF1_	6	E10	.b1 or .b2	_F001		MF1	A5	58	TV or TVB
MF1_	6	E11	.b1 or .b2	_F001		MF1	A5	59	TV or TVB
MF1_	6	E12	.b1 or .b2	_F001		MF1	A5	60	TV or TVB
MF1_	6	F01	.b1 or .b2	_F001		MF1	A5	61	TV or TVB
MF1_	6	F02	.b1 or .b2	_F001		MF1	A5	62	TV or TVB
MF1_	6	F03	.b1 or .b2	_F001		MF1	A5	63	TV or TVB
MF1_	6	F04	.b1 or .b2	_F001		MF1	A5	64	TV or TVB
MF1_	6	F05	.b1 or .b2	_F001		MF1	A5	65	TV or TVB
MF1_	6	F06	.b1 or .b2	_F001		MF1	A5	66	TV or TVB
MF1_	6	F07	.b1 or .b2	_F001		MF1	A5	67	TV or TVB
MF1_	6	F08	.b1 or .b2	_F001		MF1	A5	68	TV or TVB
MF1_	6	F09	.b1 or .b2	_F001		MF1	A5	69	TV or TVB
MF1_	6	F10	.b1 or .b2	_F001		MF1	A5	70	TV or TVB
MF1_	6	F11	.b1 or .b2	_F001		MF1	A5	71	TV or TVB
MF1_	6	F12	.b1 or .b2	_F001		MF1	A5	72	TV or TVB
MF1_	6	G01	.b1 or .b2	_F001		MF1	A5	73	TV or TVB
MF1_	6	G02	.b1 or .b2	_F001		MF1	A5	74	TV or TVB
MF1_	6	G03	.b1 or .b2	_F001		MF1	A5	75	TV or TVB
MF1_	6	G04	.b1 or .b2	_F001		MF1	A5	76	TV or TVB
MF1_	6	G05	.b1 or .b2	_F001		MF1	A5	77	TV or TVB
MF1_	6	G06	.b1 or .b2	_F001		MF1	A5	78	TV or TVB
MF1_	6	G07	.b1 or .b2	_F001		MF1	A5	79	TV or TVB
MF1_	6	G08	.b1 or .b2	_F001		MF1	A5	80	TV or TVB
MF1_	6	G09	.b1 or .b2	_F001		MF1	A5	81	TV or TVB
MF1_	6	G10	.b1 or .b2	_F001		MF1	A5	82	TV or TVB
MF1_	6	G11	.b1 or .b2	_F001		MF1	A5	83	TV or TVB
MF1_	6	G12	.b1 or .b2	_F001		MF1	A5	84	TV or TVB
MF1_	6	H01	.b1 or .b2	_F001		MF1	A5	85	TV or TVB
MF1_	6	H02	.b1 or .b2	_F001		MF1	A5	86	TV or TVB
MF1_	6	H03	.b1 or .b2	_F001		MF1	A5	87	TV or TVB
MF1_	6	H04	.b1 or .b2	_F001		MF1	A5	88	TV or TVB
MF1_	6	H05	.b1 or .b2	_F001		MF1	A5	89	TV or TVB
MF1_	6	H06	.b1 or .b2	_F001		MF1	A5	90	TV or TVB
MF1_	6	H07	.b1 or .b2	_F001		MF1	A5	91	TV or TVB
MF1_	6	H08	.b1 or .b2	_F001		MF1	A5	92	TV or TVB
MF1_	6	H09	.b1 or .b2	_F001		MF1	A5	93	TV or TVB
MF1_	6	H10	.b1 or .b2	_F001		MF1	A5	94	TV or TVB
MF1_	6	H11	.b1 or .b2	_F001		MF1	A5	95	TV or TVB
MF1_	6	H12	.b1 or .b2	_F001		MF1	A5	96	TV or TVB
MF1_	7	A01	.b1 or .b2	_F001		MF1	A6	01	TV or TVB
MF1_	7	A02	.b1 or .b2	_F001		MF1	A6	02	TV or TVB
MF1_	7	A03	.b1 or .b2	_F001		MF1	A6	03	TV or TVB
MF1_	7	A04	.b1 or .b2	_F001		MF1	A6	04	TV or TVB
MF1_	7	A05	.b1 or .b2	_F001		MF1	A6	05	TV or TVB
MF1_	7	A06	.b1 or .b2	_F001		MF1	A6	06	TV or TVB
MF1_	7	A07	.b1 or .b2	_F001		MF1	A6	07	TV or TVB
MF1_	7	A08	.b1 or .b2	_F001		MF1	A6	08	TV or TVB
MF1_	7	A09	.b1 or .b2	_F001		MF1	A6	09	TV or TVB
MF1_	7	A10	.b1 or .b2	_F001		MF1	A6	10	TV or TVB
MF1_	7	A11	.b1 or .b2	_F001		MF1	A6	11	TV or TVB
MF1_	7	A12	.b1 or .b2	_F001		MF1	A6	12	TV or TVB
MF1_	7	B01	.b1 or .b2	_F001		MF1	A6	13	TV or TVB
MF1_	7	B02	.b1 or .b2	_F001		MF1	A6	14	TV or TVB
MF1_	7	B03	.b1 or .b2	_F001		MF1	A6	15	TV or TVB
MF1_	7	B04	.b1 or .b2	_F001		MF1	A6	16	TV or TVB
MF1_	7	B05	.b1 or .b2	_F001		MF1	A6	17	TV or TVB
MF1_	7	B06	.b1 or .b2	_F001		MF1	A6	18	TV or TVB
MF1_	7	B07	.b1 or .b2	_F001		MF1	A6	19	TV or TVB
MF1_	7	B08	.b1 or .b2	_F001		MF1	A6	20	TV or TVB
MF1_	7	B09	.b1 or .b2	_F001		MF1	A6	21	TV or TVB
MF1_	7	B10	.b1 or .b2	_F001		MF1	A6	22	TV or TVB
MF1_	7	B11	.b1 or .b2	_F001		MF1	A6	23	TV or TVB
MF1_	7	B12	.b1 or .b2	_F001		MF1	A6	24	TV or TVB
MF1_	7	C01	.b1 or .b2	_F001		MF1	A6	25	TV or TVB
MF1_	7	C02	.b1 or .b2	_F001		MF1	A6	26	TV or TVB
MF1_	7	C03	.b1 or .b2	_F001		MF1	A6	27	TV or TVB
MF1_	7	C04	.b1 or .b2	_F001		MF1	A6	28	TV or TVB
MF1_	7	C05	.b1 or .b2	_F001		MF1	A6	29	TV or TVB
MF1_	7	C06	.b1 or .b2	_F001		MF1	A6	30	TV or TVB
MF1_	7	C07	.b1 or .b2	_F001		MF1	A6	31	TV or TVB
MF1_	7	C08	.b1 or .b2	_F001		MF1	A6	32	TV or TVB
MF1_	7	C09	.b1 or .b2	_F001		MF1	A6	33	TV or TVB
MF1_	7	C10	.b1 or .b2	_F001		MF1	A6	34	TV or TVB
MF1_	7	C11	.b1 or .b2	_F001		MF1	A6	35	TV or TVB
MF1_	7	C12	.b1 or .b2	_F001		MF1	A6	36	TV or TVB
MF1_	7	D01	.b1 or .b2	_F001		MF1	A6	37	TV or TVB
MF1_	7	D02	.b1 or .b2	_F001		MF1	A6	38	TV or TVB
MF1_	7	D03	.b1 or .b2	_F001		MF1	A6	39	TV or TVB
MF1_	7	D04	.b1 or .b2	_F001		MF1	A6	40	TV or TVB
MF1_	7	D05	.b1 or .b2	_F001		MF1	A6	41	TV or TVB
MF1_	7	D06	.b1 or .b2	_F001		MF1	A6	42	TV or TVB
MF1_	7	D07	.b1 or .b2	_F001		MF1	A6	43	TV or TVB
MF1_	7	D08	.b1 or .b2	_F001		MF1	A6	44	TV or TVB
MF1_	7	D09	.b1 or .b2	_F001		MF1	A6	45	TV or TVB
MF1_	7	D10	.b1 or .b2	_F001		MF1	A6	46	TV or TVB
MF1_	7	D11	.b1 or .b2	_F001		MF1	A6	47	TV or TVB
MF1_	7	D12	.b1 or .b2	_F001		MF1	A6	48	TV or TVB
MF1_	7	E01	.b1 or .b2	_F001		MF1	A6	49	TV or TVB
MF1_	7	E02	.b1 or .b2	_F001		MF1	A6	50	TV or TVB
MF1_	7	E03	.b1 or .b2	_F001		MF1	A6	51	TV or TVB
MF1_	7	E04	.b1 or .b2	_F001		MF1	A6	52	TV or TVB
MF1_	7	E05	.b1 or .b2	_F001		MF1	A6	53	TV or TVB
MF1_	7	E06	.b1 or .b2	_F001		MF1	A6	54	TV or TVB
MF1_	7	E07	.b1 or .b2	_F001		MF1	A6	55	TV or TVB
MF1_	7	E08	.b1 or .b2	_F001		MF1	A6	56	TV or TVB
MF1_	7	E09	.b1 or .b2	_F001		MF1	A6	57	TV or TVB
MF1_	7	E10	.b1 or .b2	_F001		MF1	A6	58	TV or TVB
MF1_	7	E11	.b1 or .b2	_F001		MF1	A6	59	TV or TVB
MF1_	7	E12	.b1 or .b2	_F001		MF1	A6	60	TV or TVB
MF1_	7	F01	.b1 or .b2	_F001		MF1	A6	61	TV or TVB
MF1_	7	F02	.b1 or .b2	_F001		MF1	A6	62	TV or TVB
MF1_	7	F03	.b1 or .b2	_F001		MF1	A6	63	TV or TVB
MF1_	7	F04	.b1 or .b2	_F001		MF1	A6	64	TV or TVB
MF1_	7	F05	.b1 or .b2	_F001		MF1	A6	65	TV or TVB
MF1_	7	F06	.b1 or .b2	_F001		MF1	A6	66	TV or TVB
MF1_	7	F07	.b1 or .b2	_F001		MF1	A6	67	TV or TVB
MF1_	7	F08	.b1 or .b2	_F001		MF1	A6	68	TV or TVB
MF1_	7	F09	.b1 or .b2	_F001		MF1	A6	69	TV or TVB
MF1_	7	F10	.b1 or .b2	_F001		MF1	A6	70	TV or TVB
MF1_	7	F11	.b1 or .b2	_F001		MF1	A6	71	TV or TVB
MF1_	7	F12	.b1 or .b2	_F001		MF1	A6	72	TV or TVB
MF1_	7	G01	.b1 or .b2	_F001		MF1	A6	73	TV or TVB
MF1_	7	G02	.b1 or .b2	_F001		MF1	A6	74	TV or TVB
MF1_	7	G03	.b1 or .b2	_F001		MF1	A6	75	TV or TVB
MF1_	7	G04	.b1 or .b2	_F001		MF1	A6	76	TV or TVB
MF1_	7	G05	.b1 or .b2	_F001		MF1	A6	77	TV or TVB
MF1_	7	G06	.b1 or .b2	_F001		MF1	A6	78	TV or TVB
MF1_	7	G07	.b1 or .b2	_F001		MF1	A6	79	TV or TVB
MF1_	7	G08	.b1 or .b2	_F001		MF1	A6	80	TV or TVB
MF1_	7	G09	.b1 or .b2	_F001		MF1	A6	81	TV or TVB
MF1_	7	G10	.b1 or .b2	_F001		MF1	A6	82	TV or TVB
MF1_	7	G11	.b1 or .b2	_F001		MF1	A6	83	TV or TVB
MF1_	7	G12	.b1 or .b2	_F001		MF1	A6	84	TV or TVB
MF1_	7	H01	.b1 or .b2	_F001		MF1	A6	85	TV or TVB
MF1_	7	H02	.b1 or .b2	_F001		MF1	A6	86	TV or TVB
MF1_	7	H03	.b1 or .b2	_F001		MF1	A6	87	TV or TVB
MF1_	7	H04	.b1 or .b2	_F001		MF1	A6	88	TV or TVB
MF1_	7	H05	.b1 or .b2	_F001		MF1	A6	89	TV or TVB
MF1_	7	H06	.b1 or .b2	_F001		MF1	A6	90	TV or TVB
MF1_	7	H07	.b1 or .b2	_F001		MF1	A6	91	TV or TVB
MF1_	7	H08	.b1 or .b2	_F001		MF1	A6	92	TV or TVB
MF1_	7	H09	.b1 or .b2	_F001		MF1	A6	93	TV or TVB
MF1_	7	H10	.b1 or .b2	_F001		MF1	A6	94	TV or TVB
MF1_	7	H11	.b1 or .b2	_F001		MF1	A6	95	TV or TVB
MF1_	7	H12	.b1 or .b2	_F001		MF1	A6	96	TV or TVB
MF1_	8	A01	.b1 or .b2	_F001		MF1	A7	01	TV or TVB
MF1_	8	A02	.b1 or .b2	_F001		MF1	A7	02	TV or TVB
MF1_	8	A03	.b1 or .b2	_F001		MF1	A7	03	TV or TVB
MF1_	8	A04	.b1 or .b2	_F001		MF1	A7	04	TV or TVB
MF1_	8	A05	.b1 or .b2	_F001		MF1	A7	05	TV or TVB
MF1_	8	A06	.b1 or .b2	_F001		MF1	A7	06	TV or TVB
MF1_	8	A07	.b1 or .b2	_F001		MF1	A7	07	TV or TVB
MF1_	8	A08	.b1 or .b2	_F001		MF1	A7	08	TV or TVB
MF1_	8	A09	.b1 or .b2	_F001		MF1	A7	09	TV or TVB
MF1_	8	A10	.b1 or .b2	_F001		MF1	A7	10	TV or TVB
MF1_	8	A11	.b1 or .b2	_F001		MF1	A7	11	TV or TVB
MF1_	8	A12	.b1 or .b2	_F001		MF1	A7	12	TV or TVB
MF1_	8	B01	.b1 or .b2	_F001		MF1	A7	13	TV or TVB
MF1_	8	B02	.b1 or .b2	_F001		MF1	A7	14	TV or TVB
MF1_	8	B03	.b1 or .b2	_F001		MF1	A7	15	TV or TVB
MF1_	8	B04	.b1 or .b2	_F001		MF1	A7	16	TV or TVB
MF1_	8	B05	.b1 or .b2	_F001		MF1	A7	17	TV or TVB
MF1_	8	B06	.b1 or .b2	_F001		MF1	A7	18	TV or TVB
MF1_	8	B07	.b1 or .b2	_F001		MF1	A7	19	TV or TVB
MF1_	8	B08	.b1 or .b2	_F001		MF1	A7	20	TV or TVB
MF1_	8	B09	.b1 or .b2	_F001		MF1	A7	21	TV or TVB
MF1_	8	B10	.b1 or .b2	_F001		MF1	A7	22	TV or TVB
MF1_	8	B11	.b1 or .b2	_F001		MF1	A7	23	TV or TVB
MF1_	8	B12	.b1 or .b2	_F001		MF1	A7	24	TV or TVB
MF1_	8	C01	.b1 or .b2	_F001		MF1	A7	25	TV or TVB
MF1_	8	C02	.b1 or .b2	_F001		MF1	A7	26	TV or TVB
MF1_	8	C03	.b1 or .b2	_F001		MF1	A7	27	TV or TVB
MF1_	8	C04	.b1 or .b2	_F001		MF1	A7	28	TV or TVB
MF1_	8	C05	.b1 or .b2	_F001		MF1	A7	29	TV or TVB
MF1_	8	C06	.b1 or .b2	_F001		MF1	A7	30	TV or TVB
MF1_	8	C07	.b1 or .b2	_F001		MF1	A7	31	TV or TVB
MF1_	8	C08	.b1 or .b2	_F001		MF1	A7	32	TV or TVB
MF1_	8	C09	.b1 or .b2	_F001		MF1	A7	33	TV or TVB
MF1_	8	C10	.b1 or .b2	_F001		MF1	A7	34	TV or TVB
MF1_	8	C11	.b1 or .b2	_F001		MF1	A7	35	TV or TVB
MF1_	8	C12	.b1 or .b2	_F001		MF1	A7	36	TV or TVB
MF1_	8	D01	.b1 or .b2	_F001		MF1	A7	37	TV or TVB
MF1_	8	D02	.b1 or .b2	_F001		MF1	A7	38	TV or TVB
MF1_	8	D03	.b1 or .b2	_F001		MF1	A7	39	TV or TVB
MF1_	8	D04	.b1 or .b2	_F001		MF1	A7	40	TV or TVB
MF1_	8	D05	.b1 or .b2	_F001		MF1	A7	41	TV or TVB
MF1_	8	D06	.b1 or .b2	_F001		MF1	A7	42	TV or TVB
MF1_	8	D07	.b1 or .b2	_F001		MF1	A7	43	TV or TVB
MF1_	8	D08	.b1 or .b2	_F001		MF1	A7	44	TV or TVB
MF1_	8	D09	.b1 or .b2	_F001		MF1	A7	45	TV or TVB
MF1_	8	D10	.b1 or .b2	_F001		MF1	A7	46	TV or TVB
MF1_	8	D11	.b1 or .b2	_F001		MF1	A7	47	TV or TVB
MF1_	8	D12	.b1 or .b2	_F001		MF1	A7	48	TV or TVB
MF1_	8	E01	.b1 or .b2	_F001		MF1	A7	49	TV or TVB
MF1_	8	E02	.b1 or .b2	_F001		MF1	A7	50	TV or TVB
MF1_	8	E03	.b1 or .b2	_F001		MF1	A7	51	TV or TVB
MF1_	8	E04	.b1 or .b2	_F001		MF1	A7	52	TV or TVB
MF1_	8	E05	.b1 or .b2	_F001		MF1	A7	53	TV or TVB
MF1_	8	E06	.b1 or .b2	_F001		MF1	A7	54	TV or TVB
MF1_	8	E07	.b1 or .b2	_F001		MF1	A7	55	TV or TVB
MF1_	8	E08	.b1 or .b2	_F001		MF1	A7	56	TV or TVB
MF1_	8	E09	.b1 or .b2	_F001		MF1	A7	57	TV or TVB
MF1_	8	E10	.b1 or .b2	_F001		MF1	A7	58	TV or TVB
MF1_	8	E11	.b1 or .b2	_F001		MF1	A7	59	TV or TVB
MF1_	8	E12	.b1 or .b2	_F001		MF1	A7	60	TV or TVB
MF1_	8	F01	.b1 or .b2	_F001		MF1	A7	61	TV or TVB
MF1_	8	F02	.b1 or .b2	_F001		MF1	A7	62	TV or TVB
MF1_	8	F03	.b1 or .b2	_F001		MF1	A7	63	TV or TVB
MF1_	8	F04	.b1 or .b2	_F001		MF1	A7	64	TV or TVB
MF1_	8	F05	.b1 or .b2	_F001		MF1	A7	65	TV or TVB
MF1_	8	F06	.b1 or .b2	_F001		MF1	A7	66	TV or TVB
MF1_	8	F07	.b1 or .b2	_F001		MF1	A7	67	TV or TVB
MF1_	8	F08	.b1 or .b2	_F001		MF1	A7	68	TV or TVB
MF1_	8	F09	.b1 or .b2	_F001		MF1	A7	69	TV or TVB
MF1_	8	F10	.b1 or .b2	_F001		MF1	A7	70	TV or TVB
MF1_	8	F11	.b1 or .b2	_F001		MF1	A7	71	TV or TVB
MF1_	8	F12	.b1 or .b2	_F001		MF1	A7	72	TV or TVB
MF1_	8	G01	.b1 or .b2	_F001		MF1	A7	73	TV or TVB
MF1_	8	G02	.b1 or .b2	_F001		MF1	A7	74	TV or TVB
MF1_	8	G03	.b1 or .b2	_F001		MF1	A7	75	TV or TVB
MF1_	8	G04	.b1 or .b2	_F001		MF1	A7	76	TV or TVB
MF1_	8	G05	.b1 or .b2	_F001		MF1	A7	77	TV or TVB
MF1_	8	G06	.b1 or .b2	_F001		MF1	A7	78	TV or TVB
MF1_	8	G07	.b1 or .b2	_F001		MF1	A7	79	TV or TVB
MF1_	8	G08	.b1 or .b2	_F001		MF1	A7	80	TV or TVB
MF1_	8	G09	.b1 or .b2	_F001		MF1	A7	81	TV or TVB
MF1_	8	G10	.b1 or .b2	_F001		MF1	A7	82	TV or TVB
MF1_	8	G11	.b1 or .b2	_F001		MF1	A7	83	TV or TVB
MF1_	8	G12	.b1 or .b2	_F001		MF1	A7	84	TV or TVB
MF1_	8	H01	.b1 or .b2	_F001		MF1	A7	85	TV or TVB
MF1_	8	H02	.b1 or .b2	_F001		MF1	A7	86	TV or TVB
MF1_	8	H03	.b1 or .b2	_F001		MF1	A7	87	TV or TVB
MF1_	8	H04	.b1 or .b2	_F001		MF1	A7	88	TV or TVB
MF1_	8	H05	.b1 or .b2	_F001		MF1	A7	89	TV or TVB
MF1_	8	H06	.b1 or .b2	_F001		MF1	A7	90	TV or TVB
MF1_	8	H07	.b1 or .b2	_F001		MF1	A7	91	TV or TVB
MF1_	8	H08	.b1 or .b2	_F001		MF1	A7	92	TV or TVB
MF1_	8	H09	.b1 or .b2	_F001		MF1	A7	93	TV or TVB
MF1_	8	H10	.b1 or .b2	_F001		MF1	A7	94	TV or TVB
MF1_	8	H11	.b1 or .b2	_F001		MF1	A7	95	TV or TVB
MF1_	8	H12	.b1 or .b2	_F001		MF1	A7	96	TV or TVB
MF1_	9	A01	.b1 or .b2	_F001		MF1	A8	01	TV or TVB
MF1_	9	A02	.b1 or .b2	_F001		MF1	A8	02	TV or TVB
MF1_	9	A03	.b1 or .b2	_F001		MF1	A8	03	TV or TVB
MF1_	9	A04	.b1 or .b2	_F001		MF1	A8	04	TV or TVB
MF1_	9	A05	.b1 or .b2	_F001		MF1	A8	05	TV or TVB
MF1_	9	A06	.b1 or .b2	_F001		MF1	A8	06	TV or TVB
MF1_	9	A07	.b1 or .b2	_F001		MF1	A8	07	TV or TVB
MF1_	9	A08	.b1 or .b2	_F001		MF1	A8	08	TV or TVB
MF1_	9	A09	.b1 or .b2	_F001		MF1	A8	09	TV or TVB
MF1_	9	A10	.b1 or .b2	_F001		MF1	A8	10	TV or TVB
MF1_	9	A11	.b1 or .b2	_F001		MF1	A8	11	TV or TVB
MF1_	9	A12	.b1 or .b2	_F001		MF1	A8	12	TV or TVB
MF1_	9	B01	.b1 or .b2	_F001		MF1	A8	13	TV or TVB
MF1_	9	B02	.b1 or .b2	_F001		MF1	A8	14	TV or TVB
MF1_	9	B03	.b1 or .b2	_F001		MF1	A8	15	TV or TVB
MF1_	9	B04	.b1 or .b2	_F001		MF1	A8	16	TV or TVB
MF1_	9	B05	.b1 or .b2	_F001		MF1	A8	17	TV or TVB
MF1_	9	B06	.b1 or .b2	_F001		MF1	A8	18	TV or TVB
MF1_	9	B07	.b1 or .b2	_F001		MF1	A8	19	TV or TVB
MF1_	9	B08	.b1 or .b2	_F001		MF1	A8	20	TV or TVB
MF1_	9	B09	.b1 or .b2	_F001		MF1	A8	21	TV or TVB
MF1_	9	B10	.b1 or .b2	_F001		MF1	A8	22	TV or TVB
MF1_	9	B11	.b1 or .b2	_F001		MF1	A8	23	TV or TVB
MF1_	9	B12	.b1 or .b2	_F001		MF1	A8	24	TV or TVB
MF1_	9	C01	.b1 or .b2	_F001		MF1	A8	25	TV or TVB
MF1_	9	C02	.b1 or .b2	_F001		MF1	A8	26	TV or TVB
MF1_	9	C03	.b1 or .b2	_F001		MF1	A8	27	TV or TVB
MF1_	9	C04	.b1 or .b2	_F001		MF1	A8	28	TV or TVB
MF1_	9	C05	.b1 or .b2	_F001		MF1	A8	29	TV or TVB
MF1_	9	C06	.b1 or .b2	_F001		MF1	A8	30	TV or TVB
MF1_	9	C07	.b1 or .b2	_F001		MF1	A8	31	TV or TVB
MF1_	9	C08	.b1 or .b2	_F001		MF1	A8	32	TV or TVB
MF1_	9	C09	.b1 or .b2	_F001		MF1	A8	33	TV or TVB
MF1_	9	C10	.b1 or .b2	_F001		MF1	A8	34	TV or TVB
MF1_	9	C11	.b1 or .b2	_F001		MF1	A8	35	TV or TVB
MF1_	9	C12	.b1 or .b2	_F001		MF1	A8	36	TV or TVB
MF1_	9	D01	.b1 or .b2	_F001		MF1	A8	37	TV or TVB
MF1_	9	D02	.b1 or .b2	_F001		MF1	A8	38	TV or TVB
MF1_	9	D03	.b1 or .b2	_F001		MF1	A8	39	TV or TVB
MF1_	9	D04	.b1 or .b2	_F001		MF1	A8	40	TV or TVB
MF1_	9	D05	.b1 or .b2	_F001		MF1	A8	41	TV or TVB
MF1_	9	D06	.b1 or .b2	_F001		MF1	A8	42	TV or TVB
MF1_	9	D07	.b1 or .b2	_F001		MF1	A8	43	TV or TVB
MF1_	9	D08	.b1 or .b2	_F001		MF1	A8	44	TV or TVB
MF1_	9	D09	.b1 or .b2	_F001		MF1	A8	45	TV or TVB
MF1_	9	D10	.b1 or .b2	_F001		MF1	A8	46	TV or TVB
MF1_	9	D11	.b1 or .b2	_F001		MF1	A8	47	TV or TVB
MF1_	9	D12	.b1 or .b2	_F001		MF1	A8	48	TV or TVB
MF1_	9	E01	.b1 or .b2	_F001		MF1	A8	49	TV or TVB
MF1_	9	E02	.b1 or .b2	_F001		MF1	A8	50	TV or TVB
MF1_	9	E03	.b1 or .b2	_F001		MF1	A8	51	TV or TVB
MF1_	9	E04	.b1 or .b2	_F001		MF1	A8	52	TV or TVB
MF1_	9	E05	.b1 or .b2	_F001		MF1	A8	53	TV or TVB
MF1_	9	E06	.b1 or .b2	_F001		MF1	A8	54	TV or TVB
MF1_	9	E07	.b1 or .b2	_F001		MF1	A8	55	TV or TVB
MF1_	9	E08	.b1 or .b2	_F001		MF1	A8	56	TV or TVB
MF1_	9	E09	.b1 or .b2	_F001		MF1	A8	57	TV or TVB
MF1_	9	E10	.b1 or .b2	_F001		MF1	A8	58	TV or TVB
MF1_	9	E11	.b1 or .b2	_F001		MF1	A8	59	TV or TVB
MF1_	9	E12	.b1 or .b2	_F001		MF1	A8	60	TV or TVB
MF1_	9	F01	.b1 or .b2	_F001		MF1	A8	61	TV or TVB
MF1_	9	F02	.b1 or .b2	_F001		MF1	A8	62	TV or TVB
MF1_	9	F03	.b1 or .b2	_F001		MF1	A8	63	TV or TVB
MF1_	9	F04	.b1 or .b2	_F001		MF1	A8	64	TV or TVB
MF1_	9	F05	.b1 or .b2	_F001		MF1	A8	65	TV or TVB
MF1_	9	F06	.b1 or .b2	_F001		MF1	A8	66	TV or TVB
MF1_	9	F07	.b1 or .b2	_F001		MF1	A8	67	TV or TVB
MF1_	9	F08	.b1 or .b2	_F001		MF1	A8	68	TV or TVB
MF1_	9	F09	.b1 or .b2	_F001		MF1	A8	69	TV or TVB
MF1_	9	F10	.b1 or .b2	_F001		MF1	A8	70	TV or TVB
MF1_	9	F11	.b1 or .b2	_F001		MF1	A8	71	TV or TVB
MF1_	9	F12	.b1 or .b2	_F001		MF1	A8	72	TV or TVB
MF1_	9	G01	.b1 or .b2	_F001		MF1	A8	73	TV or TVB
MF1_	9	G02	.b1 or .b2	_F001		MF1	A8	74	TV or TVB
MF1_	9	G03	.b1 or .b2	_F001		MF1	A8	75	TV or TVB
MF1_	9	G04	.b1 or .b2	_F001		MF1	A8	76	TV or TVB
MF1_	9	G05	.b1 or .b2	_F001		MF1	A8	77	TV or TVB
MF1_	9	G06	.b1 or .b2	_F001		MF1	A8	78	TV or TVB
MF1_	9	G07	.b1 or .b2	_F001		MF1	A8	79	TV or TVB
MF1_	9	G08	.b1 or .b2	_F001		MF1	A8	80	TV or TVB
MF1_	9	G09	.b1 or .b2	_F001		MF1	A8	81	TV or TVB
MF1_	9	G10	.b1 or .b2	_F001		MF1	A8	82	TV or TVB
MF1_	9	G11	.b1 or .b2	_F001		MF1	A8	83	TV or TVB
MF1_	9	G12	.b1 or .b2	_F001		MF1	A8	84	TV or TVB
MF1_	9	H01	.b1 or .b2	_F001		MF1	A8	85	TV or TVB
MF1_	9	H02	.b1 or .b2	_F001		MF1	A8	86	TV or TVB
MF1_	9	H03	.b1 or .b2	_F001		MF1	A8	87	TV or TVB
MF1_	9	H04	.b1 or .b2	_F001		MF1	A8	88	TV or TVB
MF1_	9	H05	.b1 or .b2	_F001		MF1	A8	89	TV or TVB
MF1_	9	H06	.b1 or .b2	_F001		MF1	A8	90	TV or TVB
MF1_	9	H07	.b1 or .b2	_F001		MF1	A8	91	TV or TVB
MF1_	9	H08	.b1 or .b2	_F001		MF1	A8	92	TV or TVB
MF1_	9	H09	.b1 or .b2	_F001		MF1	A8	93	TV or TVB
MF1_	9	H10	.b1 or .b2	_F001		MF1	A8	94	TV or TVB
MF1_	9	H11	.b1 or .b2	_F001		MF1	A8	95	TV or TVB
MF1_	9	H12	.b1 or .b2	_F001		MF1	A8	96	TV or TVB
MF1_	10	A01	.b1 or .b2	_F001		MF1	A9	01	TV or TVB
MF1_	10	A02	.b1 or .b2	_F001		MF1	A9	02	TV or TVB
MF1_	10	A03	.b1 or .b2	_F001		MF1	A9	03	TV or TVB
MF1_	10	A04	.b1 or .b2	_F001		MF1	A9	04	TV or TVB
MF1_	10	A05	.b1 or .b2	_F001		MF1	A9	05	TV or TVB
MF1_	10	A06	.b1 or .b2	_F001		MF1	A9	06	TV or TVB
MF1_	10	A07	.b1 or .b2	_F001		MF1	A9	07	TV or TVB
MF1_	10	A08	.b1 or .b2	_F001		MF1	A9	08	TV or TVB
MF1_	10	A09	.b1 or .b2	_F001		MF1	A9	09	TV or TVB
MF1_	10	A10	.b1 or .b2	_F001		MF1	A9	10	TV or TVB
MF1_	10	A11	.b1 or .b2	_F001		MF1	A9	11	TV or TVB
MF1_	10	A12	.b1 or .b2	_F001		MF1	A9	12	TV or TVB
MF1_	10	B01	.b1 or .b2	_F001		MF1	A9	13	TV or TVB
MF1_	10	B02	.b1 or .b2	_F001		MF1	A9	14	TV or TVB
MF1_	10	B03	.b1 or .b2	_F001		MF1	A9	15	TV or TVB
MF1_	10	B04	.b1 or .b2	_F001		MF1	A9	16	TV or TVB
MF1_	10	B05	.b1 or .b2	_F001		MF1	A9	17	TV or TVB
MF1_	10	B06	.b1 or .b2	_F001		MF1	A9	18	TV or TVB
MF1_	10	B07	.b1 or .b2	_F001		MF1	A9	19	TV or TVB
MF1_	10	B08	.b1 or .b2	_F001		MF1	A9	20	TV or TVB
MF1_	10	B09	.b1 or .b2	_F001		MF1	A9	21	TV or TVB
MF1_	10	B10	.b1 or .b2	_F001		MF1	A9	22	TV or TVB
MF1_	10	B11	.b1 or .b2	_F001		MF1	A9	23	TV or TVB
MF1_	10	B12	.b1 or .b2	_F001		MF1	A9	24	TV or TVB
MF1_	10	C01	.b1 or .b2	_F001		MF1	A9	25	TV or TVB
MF1_	10	C02	.b1 or .b2	_F001		MF1	A9	26	TV or TVB
MF1_	10	C03	.b1 or .b2	_F001		MF1	A9	27	TV or TVB
MF1_	10	C04	.b1 or .b2	_F001		MF1	A9	28	TV or TVB
MF1_	10	C05	.b1 or .b2	_F001		MF1	A9	29	TV or TVB
MF1_	10	C06	.b1 or .b2	_F001		MF1	A9	30	TV or TVB
MF1_	10	C07	.b1 or .b2	_F001		MF1	A9	31	TV or TVB
MF1_	10	C08	.b1 or .b2	_F001		MF1	A9	32	TV or TVB
MF1_	10	C09	.b1 or .b2	_F001		MF1	A9	33	TV or TVB
MF1_	10	C10	.b1 or .b2	_F001		MF1	A9	34	TV or TVB
MF1_	10	C11	.b1 or .b2	_F001		MF1	A9	35	TV or TVB
MF1_	10	C12	.b1 or .b2	_F001		MF1	A9	36	TV or TVB
MF1_	10	D01	.b1 or .b2	_F001		MF1	A9	37	TV or TVB
MF1_	10	D02	.b1 or .b2	_F001		MF1	A9	38	TV or TVB
MF1_	10	D03	.b1 or .b2	_F001		MF1	A9	39	TV or TVB
MF1_	10	D04	.b1 or .b2	_F001		MF1	A9	40	TV or TVB
MF1_	10	D05	.b1 or .b2	_F001		MF1	A9	41	TV or TVB
MF1_	10	D06	.b1 or .b2	_F001		MF1	A9	42	TV or TVB
MF1_	10	D07	.b1 or .b2	_F001		MF1	A9	43	TV or TVB
MF1_	10	D08	.b1 or .b2	_F001		MF1	A9	44	TV or TVB
MF1_	10	D09	.b1 or .b2	_F001		MF1	A9	45	TV or TVB
MF1_	10	D10	.b1 or .b2	_F001		MF1	A9	46	TV or TVB
MF1_	10	D11	.b1 or .b2	_F001		MF1	A9	47	TV or TVB
MF1_	10	D12	.b1 or .b2	_F001		MF1	A9	48	TV or TVB
MF1_	10	E01	.b1 or .b2	_F001		MF1	A9	49	TV or TVB
MF1_	10	E02	.b1 or .b2	_F001		MF1	A9	50	TV or TVB
MF1_	10	E03	.b1 or .b2	_F001		MF1	A9	51	TV or TVB
MF1_	10	E04	.b1 or .b2	_F001		MF1	A9	52	TV or TVB
MF1_	10	E05	.b1 or .b2	_F001		MF1	A9	53	TV or TVB
MF1_	10	E06	.b1 or .b2	_F001		MF1	A9	54	TV or TVB
MF1_	10	E07	.b1 or .b2	_F001		MF1	A9	55	TV or TVB
MF1_	10	E08	.b1 or .b2	_F001		MF1	A9	56	TV or TVB
MF1_	10	E09	.b1 or .b2	_F001		MF1	A9	57	TV or TVB
MF1_	10	E10	.b1 or .b2	_F001		MF1	A9	58	TV or TVB
MF1_	10	E11	.b1 or .b2	_F001		MF1	A9	59	TV or TVB
MF1_	10	E12	.b1 or .b2	_F001		MF1	A9	60	TV or TVB
MF1_	10	F01	.b1 or .b2	_F001		MF1	A9	61	TV or TVB
MF1_	10	F02	.b1 or .b2	_F001		MF1	A9	62	TV or TVB
MF1_	10	F03	.b1 or .b2	_F001		MF1	A9	63	TV or TVB
MF1_	10	F04	.b1 or .b2	_F001		MF1	A9	64	TV or TVB
MF1_	10	F05	.b1 or .b2	_F001		MF1	A9	65	TV or TVB
MF1_	10	F06	.b1 or .b2	_F001		MF1	A9	66	TV or TVB
MF1_	10	F07	.b1 or .b2	_F001		MF1	A9	67	TV or TVB
MF1_	10	F08	.b1 or .b2	_F001		MF1	A9	68	TV or TVB
MF1_	10	F09	.b1 or .b2	_F001		MF1	A9	69	TV or TVB
MF1_	10	F10	.b1 or .b2	_F001		MF1	A9	70	TV or TVB
MF1_	10	F11	.b1 or .b2	_F001		MF1	A9	71	TV or TVB
MF1_	10	F12	.b1 or .b2	_F001		MF1	A9	72	TV or TVB
MF1_	10	G01	.b1 or .b2	_F001		MF1	A9	73	TV or TVB
MF1_	10	G02	.b1 or .b2	_F001		MF1	A9	74	TV or TVB
MF1_	10	G03	.b1 or .b2	_F001		MF1	A9	75	TV or TVB
MF1_	10	G04	.b1 or .b2	_F001		MF1	A9	76	TV or TVB
MF1_	10	G05	.b1 or .b2	_F001		MF1	A9	77	TV or TVB
MF1_	10	G06	.b1 or .b2	_F001		MF1	A9	78	TV or TVB
MF1_	10	G07	.b1 or .b2	_F001		MF1	A9	79	TV or TVB
MF1_	10	G08	.b1 or .b2	_F001		MF1	A9	80	TV or TVB
MF1_	10	G09	.b1 or .b2	_F001		MF1	A9	81	TV or TVB
MF1_	10	G10	.b1 or .b2	_F001		MF1	A9	82	TV or TVB
MF1_	10	G11	.b1 or .b2	_F001		MF1	A9	83	TV or TVB
MF1_	10	G12	.b1 or .b2	_F001		MF1	A9	84	TV or TVB
MF1_	10	H01	.b1 or .b2	_F001		MF1	A9	85	TV or TVB
MF1_	10	H02	.b1 or .b2	_F001		MF1	A9	86	TV or TVB
MF1_	10	H03	.b1 or .b2	_F001		MF1	A9	87	TV or TVB
MF1_	10	H04	.b1 or .b2	_F001		MF1	A9	88	TV or TVB
MF1_	10	H05	.b1 or .b2	_F001		MF1	A9	89	TV or TVB
MF1_	10	H06	.b1 or .b2	_F001		MF1	A9	90	TV or TVB
MF1_	10	H07	.b1 or .b2	_F001		MF1	A9	91	TV or TVB
MF1_	10	H08	.b1 or .b2	_F001		MF1	A9	92	TV or TVB
MF1_	10	H09	.b1 or .b2	_F001		MF1	A9	93	TV or TVB
MF1_	10	H10	.b1 or .b2	_F001		MF1	A9	94	TV or TVB
MF1_	10	H11	.b1 or .b2	_F001		MF1	A9	95	TV or TVB
MF1_	10	H12	.b1 or .b2	_F001		MF1	A9	96	TV or TVB
MF1_	11	A01	.b1 or .b2	_F001		MF1	AA	01	TV or TVB
MF1_	11	A02	.b1 or .b2	_F001		MF1	AA	02	TV or TVB
MF1_	11	A03	.b1 or .b2	_F001		MF1	AA	03	TV or TVB
MF1_	11	A04	.b1 or .b2	_F001		MF1	AA	04	TV or TVB
MF1_	11	A05	.b1 or .b2	_F001		MF1	AA	05	TV or TVB
MF1_	11	A06	.b1 or .b2	_F001		MF1	AA	06	TV or TVB
MF1_	11	A07	.b1 or .b2	_F001		MF1	AA	07	TV or TVB
MF1_	11	A08	.b1 or .b2	_F001		MF1	AA	08	TV or TVB
MF1_	11	A09	.b1 or .b2	_F001		MF1	AA	09	TV or TVB
MF1_	11	A10	.b1 or .b2	_F001		MF1	AA	10	TV or TVB
MF1_	11	A11	.b1 or .b2	_F001		MF1	AA	11	TV or TVB
MF1_	11	A12	.b1 or .b2	_F001		MF1	AA	12	TV or TVB
MF1_	11	B01	.b1 or .b2	_F001		MF1	AA	13	TV or TVB
MF1_	11	B02	.b1 or .b2	_F001		MF1	AA	14	TV or TVB
MF1_	11	B03	.b1 or .b2	_F001		MF1	AA	15	TV or TVB
MF1_	11	B04	.b1 or .b2	_F001		MF1	AA	16	TV or TVB
MF1_	11	B05	.b1 or .b2	_F001		MF1	AA	17	TV or TVB
MF1_	11	B06	.b1 or .b2	_F001		MF1	AA	18	TV or TVB
MF1_	11	B07	.b1 or .b2	_F001		MF1	AA	19	TV or TVB
MF1_	11	B08	.b1 or .b2	_F001		MF1	AA	20	TV or TVB
MF1_	11	B09	.b1 or .b2	_F001		MF1	AA	21	TV or TVB
MF1_	11	B10	.b1 or .b2	_F001		MF1	AA	22	TV or TVB
MF1_	11	B11	.b1 or .b2	_F001		MF1	AA	23	TV or TVB
MF1_	11	B12	.b1 or .b2	_F001		MF1	AA	24	TV or TVB
MF1_	11	C01	.b1 or .b2	_F001		MF1	AA	25	TV or TVB
MF1_	11	C02	.b1 or .b2	_F001		MF1	AA	26	TV or TVB
MF1_	11	C03	.b1 or .b2	_F001		MF1	AA	27	TV or TVB
MF1_	11	C04	.b1 or .b2	_F001		MF1	AA	28	TV or TVB
MF1_	11	C05	.b1 or .b2	_F001		MF1	AA	29	TV or TVB
MF1_	11	C06	.b1 or .b2	_F001		MF1	AA	30	TV or TVB
MF1_	11	C07	.b1 or .b2	_F001		MF1	AA	31	TV or TVB
MF1_	11	C08	.b1 or .b2	_F001		MF1	AA	32	TV or TVB
MF1_	11	C09	.b1 or .b2	_F001		MF1	AA	33	TV or TVB
MF1_	11	C10	.b1 or .b2	_F001		MF1	AA	34	TV or TVB
MF1_	11	C11	.b1 or .b2	_F001		MF1	AA	35	TV or TVB
MF1_	11	C12	.b1 or .b2	_F001		MF1	AA	36	TV or TVB
MF1_	11	D01	.b1 or .b2	_F001		MF1	AA	37	TV or TVB
MF1_	11	D02	.b1 or .b2	_F001		MF1	AA	38	TV or TVB
MF1_	11	D03	.b1 or .b2	_F001		MF1	AA	39	TV or TVB
MF1_	11	D04	.b1 or .b2	_F001		MF1	AA	40	TV or TVB
MF1_	11	D05	.b1 or .b2	_F001		MF1	AA	41	TV or TVB
MF1_	11	D06	.b1 or .b2	_F001		MF1	AA	42	TV or TVB
MF1_	11	D07	.b1 or .b2	_F001		MF1	AA	43	TV or TVB
MF1_	11	D08	.b1 or .b2	_F001		MF1	AA	44	TV or TVB
MF1_	11	D09	.b1 or .b2	_F001		MF1	AA	45	TV or TVB
MF1_	11	D10	.b1 or .b2	_F001		MF1	AA	46	TV or TVB
MF1_	11	D11	.b1 or .b2	_F001		MF1	AA	47	TV or TVB
MF1_	11	D12	.b1 or .b2	_F001		MF1	AA	48	TV or TVB
MF1_	11	E01	.b1 or .b2	_F001		MF1	AA	49	TV or TVB
MF1_	11	E02	.b1 or .b2	_F001		MF1	AA	50	TV or TVB
MF1_	11	E03	.b1 or .b2	_F001		MF1	AA	51	TV or TVB
MF1_	11	E04	.b1 or .b2	_F001		MF1	AA	52	TV or TVB
MF1_	11	E05	.b1 or .b2	_F001		MF1	AA	53	TV or TVB
MF1_	11	E06	.b1 or .b2	_F001		MF1	AA	54	TV or TVB
MF1_	11	E07	.b1 or .b2	_F001		MF1	AA	55	TV or TVB
MF1_	11	E08	.b1 or .b2	_F001		MF1	AA	56	TV or TVB
MF1_	11	E09	.b1 or .b2	_F001		MF1	AA	57	TV or TVB
MF1_	11	E10	.b1 or .b2	_F001		MF1	AA	58	TV or TVB
MF1_	11	E11	.b1 or .b2	_F001		MF1	AA	59	TV or TVB
MF1_	11	E12	.b1 or .b2	_F001		MF1	AA	60	TV or TVB
MF1_	11	F01	.b1 or .b2	_F001		MF1	AA	61	TV or TVB
MF1_	11	F02	.b1 or .b2	_F001		MF1	AA	62	TV or TVB
MF1_	11	F03	.b1 or .b2	_F001		MF1	AA	63	TV or TVB
MF1_	11	F04	.b1 or .b2	_F001		MF1	AA	64	TV or TVB
MF1_	11	F05	.b1 or .b2	_F001		MF1	AA	65	TV or TVB
MF1_	11	F06	.b1 or .b2	_F001		MF1	AA	66	TV or TVB
MF1_	11	F07	.b1 or .b2	_F001		MF1	AA	67	TV or TVB
MF1_	11	F08	.b1 or .b2	_F001		MF1	AA	68	TV or TVB
MF1_	11	F09	.b1 or .b2	_F001		MF1	AA	69	TV or TVB
MF1_	11	F10	.b1 or .b2	_F001		MF1	AA	70	TV or TVB
MF1_	11	F11	.b1 or .b2	_F001		MF1	AA	71	TV or TVB
MF1_	11	F12	.b1 or .b2	_F001		MF1	AA	72	TV or TVB
MF1_	11	G01	.b1 or .b2	_F001		MF1	AA	73	TV or TVB
MF1_	11	G02	.b1 or .b2	_F001		MF1	AA	74	TV or TVB
MF1_	11	G03	.b1 or .b2	_F001		MF1	AA	75	TV or TVB
MF1_	11	G04	.b1 or .b2	_F001		MF1	AA	76	TV or TVB
MF1_	11	G05	.b1 or .b2	_F001		MF1	AA	77	TV or TVB
MF1_	11	G06	.b1 or .b2	_F001		MF1	AA	78	TV or TVB
MF1_	11	G07	.b1 or .b2	_F001		MF1	AA	79	TV or TVB
MF1_	11	G08	.b1 or .b2	_F001		MF1	AA	80	TV or TVB
MF1_	11	G09	.b1 or .b2	_F001		MF1	AA	81	TV or TVB
MF1_	11	G10	.b1 or .b2	_F001		MF1	AA	82	TV or TVB
MF1_	11	G11	.b1 or .b2	_F001		MF1	AA	83	TV or TVB
MF1_	11	G12	.b1 or .b2	_F001		MF1	AA	84	TV or TVB
MF1_	11	H01	.b1 or .b2	_F001		MF1	AA	85	TV or TVB
MF1_	11	H02	.b1 or .b2	_F001		MF1	AA	86	TV or TVB
MF1_	11	H03	.b1 or .b2	_F001		MF1	AA	87	TV or TVB
MF1_	11	H04	.b1 or .b2	_F001		MF1	AA	88	TV or TVB
MF1_	11	H05	.b1 or .b2	_F001		MF1	AA	89	TV or TVB
MF1_	11	H06	.b1 or .b2	_F001		MF1	AA	90	TV or TVB
MF1_	11	H07	.b1 or .b2	_F001		MF1	AA	91	TV or TVB
MF1_	11	H08	.b1 or .b2	_F001		MF1	AA	92	TV or TVB
MF1_	11	H09	.b1 or .b2	_F001		MF1	AA	93	TV or TVB
MF1_	11	H10	.b1 or .b2	_F001		MF1	AA	94	TV or TVB
MF1_	11	H11	.b1 or .b2	_F001		MF1	AA	95	TV or TVB
MF1_	11	H12	.b1 or .b2	_F001		MF1	AA	96	TV or TVB
MF1_	12	A01	.b1 or .b2	_F001		MF1	AB	01	TV or TVB
MF1_	12	A02	.b1 or .b2	_F001		MF1	AB	02	TV or TVB
MF1_	12	A03	.b1 or .b2	_F001		MF1	AB	03	TV or TVB
MF1_	12	A04	.b1 or .b2	_F001		MF1	AB	04	TV or TVB
MF1_	12	A05	.b1 or .b2	_F001		MF1	AB	05	TV or TVB
MF1_	12	A06	.b1 or .b2	_F001		MF1	AB	06	TV or TVB
MF1_	12	A07	.b1 or .b2	_F001		MF1	AB	07	TV or TVB
MF1_	12	A08	.b1 or .b2	_F001		MF1	AB	08	TV or TVB
MF1_	12	A09	.b1 or .b2	_F001		MF1	AB	09	TV or TVB
MF1_	12	A10	.b1 or .b2	_F001		MF1	AB	10	TV or TVB
MF1_	12	A11	.b1 or .b2	_F001		MF1	AB	11	TV or TVB
MF1_	12	A12	.b1 or .b2	_F001		MF1	AB	12	TV or TVB
MF1_	12	B01	.b1 or .b2	_F001		MF1	AB	13	TV or TVB
MF1_	12	B02	.b1 or .b2	_F001		MF1	AB	14	TV or TVB
MF1_	12	B03	.b1 or .b2	_F001		MF1	AB	15	TV or TVB
MF1_	12	B04	.b1 or .b2	_F001		MF1	AB	16	TV or TVB
MF1_	12	B05	.b1 or .b2	_F001		MF1	AB	17	TV or TVB
MF1_	12	B06	.b1 or .b2	_F001		MF1	AB	18	TV or TVB
MF1_	12	B07	.b1 or .b2	_F001		MF1	AB	19	TV or TVB
MF1_	12	B08	.b1 or .b2	_F001		MF1	AB	20	TV or TVB
MF1_	12	B09	.b1 or .b2	_F001		MF1	AB	21	TV or TVB
MF1_	12	B10	.b1 or .b2	_F001		MF1	AB	22	TV or TVB
MF1_	12	B11	.b1 or .b2	_F001		MF1	AB	23	TV or TVB
MF1_	12	B12	.b1 or .b2	_F001		MF1	AB	24	TV or TVB
MF1_	12	C01	.b1 or .b2	_F001		MF1	AB	25	TV or TVB
MF1_	12	C02	.b1 or .b2	_F001		MF1	AB	26	TV or TVB
MF1_	12	C03	.b1 or .b2	_F001		MF1	AB	27	TV or TVB
MF1_	12	C04	.b1 or .b2	_F001		MF1	AB	28	TV or TVB
MF1_	12	C05	.b1 or .b2	_F001		MF1	AB	29	TV or TVB
MF1_	12	C06	.b1 or .b2	_F001		MF1	AB	30	TV or TVB
MF1_	12	C07	.b1 or .b2	_F001		MF1	AB	31	TV or TVB
MF1_	12	C08	.b1 or .b2	_F001		MF1	AB	32	TV or TVB
MF1_	12	C09	.b1 or .b2	_F001		MF1	AB	33	TV or TVB
MF1_	12	C10	.b1 or .b2	_F001		MF1	AB	34	TV or TVB
MF1_	12	C11	.b1 or .b2	_F001		MF1	AB	35	TV or TVB
MF1_	12	C12	.b1 or .b2	_F001		MF1	AB	36	TV or TVB
MF1_	12	D01	.b1 or .b2	_F001		MF1	AB	37	TV or TVB
MF1_	12	D02	.b1 or .b2	_F001		MF1	AB	38	TV or TVB
MF1_	12	D03	.b1 or .b2	_F001		MF1	AB	39	TV or TVB
MF1_	12	D04	.b1 or .b2	_F001		MF1	AB	40	TV or TVB
MF1_	12	D05	.b1 or .b2	_F001		MF1	AB	41	TV or TVB
MF1_	12	D06	.b1 or .b2	_F001		MF1	AB	42	TV or TVB
MF1_	12	D07	.b1 or .b2	_F001		MF1	AB	43	TV or TVB
MF1_	12	D08	.b1 or .b2	_F001		MF1	AB	44	TV or TVB
MF1_	12	D09	.b1 or .b2	_F001		MF1	AB	45	TV or TVB
MF1_	12	D10	.b1 or .b2	_F001		MF1	AB	46	TV or TVB
MF1_	12	D11	.b1 or .b2	_F001		MF1	AB	47	TV or TVB
MF1_	12	D12	.b1 or .b2	_F001		MF1	AB	48	TV or TVB
MF1_	12	E01	.b1 or .b2	_F001		MF1	AB	49	TV or TVB
MF1_	12	E02	.b1 or .b2	_F001		MF1	AB	50	TV or TVB
MF1_	12	E03	.b1 or .b2	_F001		MF1	AB	51	TV or TVB
MF1_	12	E04	.b1 or .b2	_F001		MF1	AB	52	TV or TVB
MF1_	12	E05	.b1 or .b2	_F001		MF1	AB	53	TV or TVB
MF1_	12	E06	.b1 or .b2	_F001		MF1	AB	54	TV or TVB
MF1_	12	E07	.b1 or .b2	_F001		MF1	AB	55	TV or TVB
MF1_	12	E08	.b1 or .b2	_F001		MF1	AB	56	TV or TVB
MF1_	12	E09	.b1 or .b2	_F001		MF1	AB	57	TV or TVB
MF1_	12	E10	.b1 or .b2	_F001		MF1	AB	58	TV or TVB
MF1_	12	E11	.b1 or .b2	_F001		MF1	AB	59	TV or TVB
MF1_	12	E12	.b1 or .b2	_F001		MF1	AB	60	TV or TVB
MF1_	12	F01	.b1 or .b2	_F001		MF1	AB	61	TV or TVB
MF1_	12	F02	.b1 or .b2	_F001		MF1	AB	62	TV or TVB
MF1_	12	F03	.b1 or .b2	_F001		MF1	AB	63	TV or TVB
MF1_	12	F04	.b1 or .b2	_F001		MF1	AB	64	TV or TVB
MF1_	12	F05	.b1 or .b2	_F001		MF1	AB	65	TV or TVB
MF1_	12	F06	.b1 or .b2	_F001		MF1	AB	66	TV or TVB
MF1_	12	F07	.b1 or .b2	_F001		MF1	AB	67	TV or TVB
MF1_	12	F08	.b1 or .b2	_F001		MF1	AB	68	TV or TVB
MF1_	12	F09	.b1 or .b2	_F001		MF1	AB	69	TV or TVB
MF1_	12	F10	.b1 or .b2	_F001		MF1	AB	70	TV or TVB
MF1_	12	F11	.b1 or .b2	_F001		MF1	AB	71	TV or TVB
MF1_	12	F12	.b1 or .b2	_F001		MF1	AB	72	TV or TVB
MF1_	12	G01	.b1 or .b2	_F001		MF1	AB	73	TV or TVB
MF1_	12	G02	.b1 or .b2	_F001		MF1	AB	74	TV or TVB
MF1_	12	G03	.b1 or .b2	_F001		MF1	AB	75	TV or TVB
MF1_	12	G04	.b1 or .b2	_F001		MF1	AB	76	TV or TVB
MF1_	12	G05	.b1 or .b2	_F001		MF1	AB	77	TV or TVB
MF1_	12	G06	.b1 or .b2	_F001		MF1	AB	78	TV or TVB
MF1_	12	G07	.b1 or .b2	_F001		MF1	AB	79	TV or TVB
MF1_	12	G08	.b1 or .b2	_F001		MF1	AB	80	TV or TVB
MF1_	12	G09	.b1 or .b2	_F001		MF1	AB	81	TV or TVB
MF1_	12	G10	.b1 or .b2	_F001		MF1	AB	82	TV or TVB
MF1_	12	G11	.b1 or .b2	_F001		MF1	AB	83	TV or TVB
MF1_	12	G12	.b1 or .b2	_F001		MF1	AB	84	TV or TVB
MF1_	12	H01	.b1 or .b2	_F001		MF1	AB	85	TV or TVB
MF1_	12	H02	.b1 or .b2	_F001		MF1	AB	86	TV or TVB
MF1_	12	H03	.b1 or .b2	_F001		MF1	AB	87	TV or TVB
MF1_	12	H04	.b1 or .b2	_F001		MF1	AB	88	TV or TVB
MF1_	12	H05	.b1 or .b2	_F001		MF1	AB	89	TV or TVB
MF1_	12	H06	.b1 or .b2	_F001		MF1	AB	90	TV or TVB
MF1_	12	H07	.b1 or .b2	_F001		MF1	AB	91	TV or TVB
MF1_	12	H08	.b1 or .b2	_F001		MF1	AB	92	TV or TVB
MF1_	12	H09	.b1 or .b2	_F001		MF1	AB	93	TV or TVB
MF1_	12	H10	.b1 or .b2	_F001		MF1	AB	94	TV or TVB
MF1_	12	H11	.b1 or .b2	_F001		MF1	AB	95	TV or TVB
MF1_	12	H12	.b1 or .b2	_F001		MF1	AB	96	TV or TVB
MF1_	13	A01	.b1 or .b2	_F001		MF1	AC	01	TV or TVB
MF1_	13	A02	.b1 or .b2	_F001		MF1	AC	02	TV or TVB
MF1_	13	A03	.b1 or .b2	_F001		MF1	AC	03	TV or TVB
MF1_	13	A04	.b1 or .b2	_F001		MF1	AC	04	TV or TVB
MF1_	13	A05	.b1 or .b2	_F001		MF1	AC	05	TV or TVB
MF1_	13	A06	.b1 or .b2	_F001		MF1	AC	06	TV or TVB
MF1_	13	A07	.b1 or .b2	_F001		MF1	AC	07	TV or TVB
MF1_	13	A08	.b1 or .b2	_F001		MF1	AC	08	TV or TVB
MF1_	13	A09	.b1 or .b2	_F001		MF1	AC	09	TV or TVB
MF1_	13	A10	.b1 or .b2	_F001		MF1	AC	10	TV or TVB
MF1_	13	A11	.b1 or .b2	_F001		MF1	AC	11	TV or TVB
MF1_	13	A12	.b1 or .b2	_F001		MF1	AC	12	TV or TVB
MF1_	13	B01	.b1 or .b2	_F001		MF1	AC	13	TV or TVB
MF1_	13	B02	.b1 or .b2	_F001		MF1	AC	14	TV or TVB
MF1_	13	B03	.b1 or .b2	_F001		MF1	AC	15	TV or TVB
MF1_	13	B04	.b1 or .b2	_F001		MF1	AC	16	TV or TVB
MF1_	13	B05	.b1 or .b2	_F001		MF1	AC	17	TV or TVB
MF1_	13	B06	.b1 or .b2	_F001		MF1	AC	18	TV or TVB
MF1_	13	B07	.b1 or .b2	_F001		MF1	AC	19	TV or TVB
MF1_	13	B08	.b1 or .b2	_F001		MF1	AC	20	TV or TVB
MF1_	13	B09	.b1 or .b2	_F001		MF1	AC	21	TV or TVB
MF1_	13	B10	.b1 or .b2	_F001		MF1	AC	22	TV or TVB
MF1_	13	B11	.b1 or .b2	_F001		MF1	AC	23	TV or TVB
MF1_	13	B12	.b1 or .b2	_F001		MF1	AC	24	TV or TVB
MF1_	13	C01	.b1 or .b2	_F001		MF1	AC	25	TV or TVB
MF1_	13	C02	.b1 or .b2	_F001		MF1	AC	26	TV or TVB
MF1_	13	C03	.b1 or .b2	_F001		MF1	AC	27	TV or TVB
MF1_	13	C04	.b1 or .b2	_F001		MF1	AC	28	TV or TVB
MF1_	13	C05	.b1 or .b2	_F001		MF1	AC	29	TV or TVB
MF1_	13	C06	.b1 or .b2	_F001		MF1	AC	30	TV or TVB
MF1_	13	C07	.b1 or .b2	_F001		MF1	AC	31	TV or TVB
MF1_	13	C08	.b1 or .b2	_F001		MF1	AC	32	TV or TVB
MF1_	13	C09	.b1 or .b2	_F001		MF1	AC	33	TV or TVB
MF1_	13	C10	.b1 or .b2	_F001		MF1	AC	34	TV or TVB
MF1_	13	C11	.b1 or .b2	_F001		MF1	AC	35	TV or TVB
MF1_	13	C12	.b1 or .b2	_F001		MF1	AC	36	TV or TVB
MF1_	13	D01	.b1 or .b2	_F001		MF1	AC	37	TV or TVB
MF1_	13	D02	.b1 or .b2	_F001		MF1	AC	38	TV or TVB
MF1_	13	D03	.b1 or .b2	_F001		MF1	AC	39	TV or TVB
MF1_	13	D04	.b1 or .b2	_F001		MF1	AC	40	TV or TVB
MF1_	13	D05	.b1 or .b2	_F001		MF1	AC	41	TV or TVB
MF1_	13	D06	.b1 or .b2	_F001		MF1	AC	42	TV or TVB
MF1_	13	D07	.b1 or .b2	_F001		MF1	AC	43	TV or TVB
MF1_	13	D08	.b1 or .b2	_F001		MF1	AC	44	TV or TVB
MF1_	13	D09	.b1 or .b2	_F001		MF1	AC	45	TV or TVB
MF1_	13	D10	.b1 or .b2	_F001		MF1	AC	46	TV or TVB
MF1_	13	D11	.b1 or .b2	_F001		MF1	AC	47	TV or TVB
MF1_	13	D12	.b1 or .b2	_F001		MF1	AC	48	TV or TVB
MF1_	13	E01	.b1 or .b2	_F001		MF1	AC	49	TV or TVB
MF1_	13	E02	.b1 or .b2	_F001		MF1	AC	50	TV or TVB
MF1_	13	E03	.b1 or .b2	_F001		MF1	AC	51	TV or TVB
MF1_	13	E04	.b1 or .b2	_F001		MF1	AC	52	TV or TVB
MF1_	13	E05	.b1 or .b2	_F001		MF1	AC	53	TV or TVB
MF1_	13	E06	.b1 or .b2	_F001		MF1	AC	54	TV or TVB
MF1_	13	E07	.b1 or .b2	_F001		MF1	AC	55	TV or TVB
MF1_	13	E08	.b1 or .b2	_F001		MF1	AC	56	TV or TVB
MF1_	13	E09	.b1 or .b2	_F001		MF1	AC	57	TV or TVB
MF1_	13	E10	.b1 or .b2	_F001		MF1	AC	58	TV or TVB
MF1_	13	E11	.b1 or .b2	_F001		MF1	AC	59	TV or TVB
MF1_	13	E12	.b1 or .b2	_F001		MF1	AC	60	TV or TVB
MF1_	13	F01	.b1 or .b2	_F001		MF1	AC	61	TV or TVB
MF1_	13	F02	.b1 or .b2	_F001		MF1	AC	62	TV or TVB
MF1_	13	F03	.b1 or .b2	_F001		MF1	AC	63	TV or TVB
MF1_	13	F04	.b1 or .b2	_F001		MF1	AC	64	TV or TVB
MF1_	13	F05	.b1 or .b2	_F001		MF1	AC	65	TV or TVB
MF1_	13	F06	.b1 or .b2	_F001		MF1	AC	66	TV or TVB
MF1_	13	F07	.b1 or .b2	_F001		MF1	AC	67	TV or TVB
MF1_	13	F08	.b1 or .b2	_F001		MF1	AC	68	TV or TVB
MF1_	13	F09	.b1 or .b2	_F001		MF1	AC	69	TV or TVB
MF1_	13	F10	.b1 or .b2	_F001		MF1	AC	70	TV or TVB
MF1_	13	F11	.b1 or .b2	_F001		MF1	AC	71	TV or TVB
MF1_	13	F12	.b1 or .b2	_F001		MF1	AC	72	TV or TVB
MF1_	13	G01	.b1 or .b2	_F001		MF1	AC	73	TV or TVB
MF1_	13	G02	.b1 or .b2	_F001		MF1	AC	74	TV or TVB
MF1_	13	G03	.b1 or .b2	_F001		MF1	AC	75	TV or TVB
MF1_	13	G04	.b1 or .b2	_F001		MF1	AC	76	TV or TVB
MF1_	13	G05	.b1 or .b2	_F001		MF1	AC	77	TV or TVB
MF1_	13	G06	.b1 or .b2	_F001		MF1	AC	78	TV or TVB
MF1_	13	G07	.b1 or .b2	_F001		MF1	AC	79	TV or TVB
MF1_	13	G08	.b1 or .b2	_F001		MF1	AC	80	TV or TVB
MF1_	13	G09	.b1 or .b2	_F001		MF1	AC	81	TV or TVB
MF1_	13	G10	.b1 or .b2	_F001		MF1	AC	82	TV or TVB
MF1_	13	G11	.b1 or .b2	_F001		MF1	AC	83	TV or TVB
MF1_	13	G12	.b1 or .b2	_F001		MF1	AC	84	TV or TVB
MF1_	13	H01	.b1 or .b2	_F001		MF1	AC	85	TV or TVB
MF1_	13	H02	.b1 or .b2	_F001		MF1	AC	86	TV or TVB
MF1_	13	H03	.b1 or .b2	_F001		MF1	AC	87	TV or TVB
MF1_	13	H04	.b1 or .b2	_F001		MF1	AC	88	TV or TVB
MF1_	13	H05	.b1 or .b2	_F001		MF1	AC	89	TV or TVB
MF1_	13	H06	.b1 or .b2	_F001		MF1	AC	90	TV or TVB
MF1_	13	H07	.b1 or .b2	_F001		MF1	AC	91	TV or TVB
MF1_	13	H08	.b1 or .b2	_F001		MF1	AC	92	TV or TVB
MF1_	13	H09	.b1 or .b2	_F001		MF1	AC	93	TV or TVB
MF1_	13	H10	.b1 or .b2	_F001		MF1	AC	94	TV or TVB
MF1_	13	H11	.b1 or .b2	_F001		MF1	AC	95	TV or TVB
MF1_	13	H12	.b1 or .b2	_F001		MF1	AC	96	TV or TVB
MF1_	14	A01	.b1 or .b2	_F001		MF1	AD	01	TV or TVB
MF1_	14	A02	.b1 or .b2	_F001		MF1	AD	02	TV or TVB
MF1_	14	A03	.b1 or .b2	_F001		MF1	AD	03	TV or TVB
MF1_	14	A04	.b1 or .b2	_F001		MF1	AD	04	TV or TVB
MF1_	14	A05	.b1 or .b2	_F001		MF1	AD	05	TV or TVB
MF1_	14	A06	.b1 or .b2	_F001		MF1	AD	06	TV or TVB
MF1_	14	A07	.b1 or .b2	_F001		MF1	AD	07	TV or TVB
MF1_	14	A08	.b1 or .b2	_F001		MF1	AD	08	TV or TVB
MF1_	14	A09	.b1 or .b2	_F001		MF1	AD	09	TV or TVB
MF1_	14	A10	.b1 or .b2	_F001		MF1	AD	10	TV or TVB
MF1_	14	A11	.b1 or .b2	_F001		MF1	AD	11	TV or TVB
MF1_	14	A12	.b1 or .b2	_F001		MF1	AD	12	TV or TVB
MF1_	14	B01	.b1 or .b2	_F001		MF1	AD	13	TV or TVB
MF1_	14	B02	.b1 or .b2	_F001		MF1	AD	14	TV or TVB
MF1_	14	B03	.b1 or .b2	_F001		MF1	AD	15	TV or TVB
MF1_	14	B04	.b1 or .b2	_F001		MF1	AD	16	TV or TVB
MF1_	14	B05	.b1 or .b2	_F001		MF1	AD	17	TV or TVB
MF1_	14	B06	.b1 or .b2	_F001		MF1	AD	18	TV or TVB
MF1_	14	B07	.b1 or .b2	_F001		MF1	AD	19	TV or TVB
MF1_	14	B08	.b1 or .b2	_F001		MF1	AD	20	TV or TVB
MF1_	14	B09	.b1 or .b2	_F001		MF1	AD	21	TV or TVB
MF1_	14	B10	.b1 or .b2	_F001		MF1	AD	22	TV or TVB
MF1_	14	B11	.b1 or .b2	_F001		MF1	AD	23	TV or TVB
MF1_	14	B12	.b1 or .b2	_F001		MF1	AD	24	TV or TVB
MF1_	14	C01	.b1 or .b2	_F001		MF1	AD	25	TV or TVB
MF1_	14	C02	.b1 or .b2	_F001		MF1	AD	26	TV or TVB
MF1_	14	C03	.b1 or .b2	_F001		MF1	AD	27	TV or TVB
MF1_	14	C04	.b1 or .b2	_F001		MF1	AD	28	TV or TVB
MF1_	14	C05	.b1 or .b2	_F001		MF1	AD	29	TV or TVB
MF1_	14	C06	.b1 or .b2	_F001		MF1	AD	30	TV or TVB
MF1_	14	C07	.b1 or .b2	_F001		MF1	AD	31	TV or TVB
MF1_	14	C08	.b1 or .b2	_F001		MF1	AD	32	TV or TVB
MF1_	14	C09	.b1 or .b2	_F001		MF1	AD	33	TV or TVB
MF1_	14	C10	.b1 or .b2	_F001		MF1	AD	34	TV or TVB
MF1_	14	C11	.b1 or .b2	_F001		MF1	AD	35	TV or TVB
MF1_	14	C12	.b1 or .b2	_F001		MF1	AD	36	TV or TVB
MF1_	14	D01	.b1 or .b2	_F001		MF1	AD	37	TV or TVB
MF1_	14	D02	.b1 or .b2	_F001		MF1	AD	38	TV or TVB
MF1_	14	D03	.b1 or .b2	_F001		MF1	AD	39	TV or TVB
MF1_	14	D04	.b1 or .b2	_F001		MF1	AD	40	TV or TVB
MF1_	14	D05	.b1 or .b2	_F001		MF1	AD	41	TV or TVB
MF1_	14	D06	.b1 or .b2	_F001		MF1	AD	42	TV or TVB
MF1_	14	D07	.b1 or .b2	_F001		MF1	AD	43	TV or TVB
MF1_	14	D08	.b1 or .b2	_F001		MF1	AD	44	TV or TVB
MF1_	14	D09	.b1 or .b2	_F001		MF1	AD	45	TV or TVB
MF1_	14	D10	.b1 or .b2	_F001		MF1	AD	46	TV or TVB
MF1_	14	D11	.b1 or .b2	_F001		MF1	AD	47	TV or TVB
MF1_	14	D12	.b1 or .b2	_F001		MF1	AD	48	TV or TVB
MF1_	14	E01	.b1 or .b2	_F001		MF1	AD	49	TV or TVB
MF1_	14	E02	.b1 or .b2	_F001		MF1	AD	50	TV or TVB
MF1_	14	E03	.b1 or .b2	_F001		MF1	AD	51	TV or TVB
MF1_	14	E04	.b1 or .b2	_F001		MF1	AD	52	TV or TVB
MF1_	14	E05	.b1 or .b2	_F001		MF1	AD	53	TV or TVB
MF1_	14	E06	.b1 or .b2	_F001		MF1	AD	54	TV or TVB
MF1_	14	E07	.b1 or .b2	_F001		MF1	AD	55	TV or TVB
MF1_	14	E08	.b1 or .b2	_F001		MF1	AD	56	TV or TVB
MF1_	14	E09	.b1 or .b2	_F001		MF1	AD	57	TV or TVB
MF1_	14	E10	.b1 or .b2	_F001		MF1	AD	58	TV or TVB
MF1_	14	E11	.b1 or .b2	_F001		MF1	AD	59	TV or TVB
MF1_	14	E12	.b1 or .b2	_F001		MF1	AD	60	TV or TVB
MF1_	14	F01	.b1 or .b2	_F001		MF1	AD	61	TV or TVB
MF1_	14	F02	.b1 or .b2	_F001		MF1	AD	62	TV or TVB
MF1_	14	F03	.b1 or .b2	_F001		MF1	AD	63	TV or TVB
MF1_	14	F04	.b1 or .b2	_F001		MF1	AD	64	TV or TVB
MF1_	14	F05	.b1 or .b2	_F001		MF1	AD	65	TV or TVB
MF1_	14	F06	.b1 or .b2	_F001		MF1	AD	66	TV or TVB
MF1_	14	F07	.b1 or .b2	_F001		MF1	AD	67	TV or TVB
MF1_	14	F08	.b1 or .b2	_F001		MF1	AD	68	TV or TVB
MF1_	14	F09	.b1 or .b2	_F001		MF1	AD	69	TV or TVB
MF1_	14	F10	.b1 or .b2	_F001		MF1	AD	70	TV or TVB
MF1_	14	F11	.b1 or .b2	_F001		MF1	AD	71	TV or TVB
MF1_	14	F12	.b1 or .b2	_F001		MF1	AD	72	TV or TVB
MF1_	14	G01	.b1 or .b2	_F001		MF1	AD	73	TV or TVB
MF1_	14	G02	.b1 or .b2	_F001		MF1	AD	74	TV or TVB
MF1_	14	G03	.b1 or .b2	_F001		MF1	AD	75	TV or TVB
MF1_	14	G04	.b1 or .b2	_F001		MF1	AD	76	TV or TVB
MF1_	14	G05	.b1 or .b2	_F001		MF1	AD	77	TV or TVB
MF1_	14	G06	.b1 or .b2	_F001		MF1	AD	78	TV or TVB
MF1_	14	G07	.b1 or .b2	_F001		MF1	AD	79	TV or TVB
MF1_	14	G08	.b1 or .b2	_F001		MF1	AD	80	TV or TVB
MF1_	14	G09	.b1 or .b2	_F001		MF1	AD	81	TV or TVB
MF1_	14	G10	.b1 or .b2	_F001		MF1	AD	82	TV or TVB
MF1_	14	G11	.b1 or .b2	_F001		MF1	AD	83	TV or TVB
MF1_	14	G12	.b1 or .b2	_F001		MF1	AD	84	TV or TVB
MF1_	14	H01	.b1 or .b2	_F001		MF1	AD	85	TV or TVB
MF1_	14	H02	.b1 or .b2	_F001		MF1	AD	86	TV or TVB
MF1_	14	H03	.b1 or .b2	_F001		MF1	AD	87	TV or TVB
MF1_	14	H04	.b1 or .b2	_F001		MF1	AD	88	TV or TVB
MF1_	14	H05	.b1 or .b2	_F001		MF1	AD	89	TV or TVB
MF1_	14	H06	.b1 or .b2	_F001		MF1	AD	90	TV or TVB
MF1_	14	H07	.b1 or .b2	_F001		MF1	AD	91	TV or TVB
MF1_	14	H08	.b1 or .b2	_F001		MF1	AD	92	TV or TVB
MF1_	14	H09	.b1 or .b2	_F001		MF1	AD	93	TV or TVB
MF1_	14	H10	.b1 or .b2	_F001		MF1	AD	94	TV or TVB
MF1_	14	H11	.b1 or .b2	_F001		MF1	AD	95	TV or TVB
MF1_	14	H12	.b1 or .b2	_F001		MF1	AD	96	TV or TVB
MF1_	15	A01	.b1 or .b2	_F001		MF1	AE	01	TV or TVB
MF1_	15	A02	.b1 or .b2	_F001		MF1	AE	02	TV or TVB
MF1_	15	A03	.b1 or .b2	_F001		MF1	AE	03	TV or TVB
MF1_	15	A04	.b1 or .b2	_F001		MF1	AE	04	TV or TVB
MF1_	15	A05	.b1 or .b2	_F001		MF1	AE	05	TV or TVB
MF1_	15	A06	.b1 or .b2	_F001		MF1	AE	06	TV or TVB
MF1_	15	A07	.b1 or .b2	_F001		MF1	AE	07	TV or TVB
MF1_	15	A08	.b1 or .b2	_F001		MF1	AE	08	TV or TVB
MF1_	15	A09	.b1 or .b2	_F001		MF1	AE	09	TV or TVB
MF1_	15	A10	.b1 or .b2	_F001		MF1	AE	10	TV or TVB
MF1_	15	A11	.b1 or .b2	_F001		MF1	AE	11	TV or TVB
MF1_	15	A12	.b1 or .b2	_F001		MF1	AE	12	TV or TVB
MF1_	15	B01	.b1 or .b2	_F001		MF1	AE	13	TV or TVB
MF1_	15	B02	.b1 or .b2	_F001		MF1	AE	14	TV or TVB
MF1_	15	B03	.b1 or .b2	_F001		MF1	AE	15	TV or TVB
MF1_	15	B04	.b1 or .b2	_F001		MF1	AE	16	TV or TVB
MF1_	15	B05	.b1 or .b2	_F001		MF1	AE	17	TV or TVB
MF1_	15	B06	.b1 or .b2	_F001		MF1	AE	18	TV or TVB
MF1_	15	B07	.b1 or .b2	_F001		MF1	AE	19	TV or TVB
MF1_	15	B08	.b1 or .b2	_F001		MF1	AE	20	TV or TVB
MF1_	15	B09	.b1 or .b2	_F001		MF1	AE	21	TV or TVB
MF1_	15	B10	.b1 or .b2	_F001		MF1	AE	22	TV or TVB
MF1_	15	B11	.b1 or .b2	_F001		MF1	AE	23	TV or TVB
MF1_	15	B12	.b1 or .b2	_F001		MF1	AE	24	TV or TVB
MF1_	15	C01	.b1 or .b2	_F001		MF1	AE	25	TV or TVB
MF1_	15	C02	.b1 or .b2	_F001		MF1	AE	26	TV or TVB
MF1_	15	C03	.b1 or .b2	_F001		MF1	AE	27	TV or TVB
MF1_	15	C04	.b1 or .b2	_F001		MF1	AE	28	TV or TVB
MF1_	15	C05	.b1 or .b2	_F001		MF1	AE	29	TV or TVB
MF1_	15	C06	.b1 or .b2	_F001		MF1	AE	30	TV or TVB
MF1_	15	C07	.b1 or .b2	_F001		MF1	AE	31	TV or TVB
MF1_	15	C08	.b1 or .b2	_F001		MF1	AE	32	TV or TVB
MF1_	15	C09	.b1 or .b2	_F001		MF1	AE	33	TV or TVB
MF1_	15	C10	.b1 or .b2	_F001		MF1	AE	34	TV or TVB
MF1_	15	C11	.b1 or .b2	_F001		MF1	AE	35	TV or TVB
MF1_	15	C12	.b1 or .b2	_F001		MF1	AE	36	TV or TVB
MF1_	15	D01	.b1 or .b2	_F001		MF1	AE	37	TV or TVB
MF1_	15	D02	.b1 or .b2	_F001		MF1	AE	38	TV or TVB
MF1_	15	D03	.b1 or .b2	_F001		MF1	AE	39	TV or TVB
MF1_	15	D04	.b1 or .b2	_F001		MF1	AE	40	TV or TVB
MF1_	15	D05	.b1 or .b2	_F001		MF1	AE	41	TV or TVB
MF1_	15	D06	.b1 or .b2	_F001		MF1	AE	42	TV or TVB
MF1_	15	D07	.b1 or .b2	_F001		MF1	AE	43	TV or TVB
MF1_	15	D08	.b1 or .b2	_F001		MF1	AE	44	TV or TVB
MF1_	15	D09	.b1 or .b2	_F001		MF1	AE	45	TV or TVB
MF1_	15	D10	.b1 or .b2	_F001		MF1	AE	46	TV or TVB
MF1_	15	D11	.b1 or .b2	_F001		MF1	AE	47	TV or TVB
MF1_	15	D12	.b1 or .b2	_F001		MF1	AE	48	TV or TVB
MF1_	15	E01	.b1 or .b2	_F001		MF1	AE	49	TV or TVB
MF1_	15	E02	.b1 or .b2	_F001		MF1	AE	50	TV or TVB
MF1_	15	E03	.b1 or .b2	_F001		MF1	AE	51	TV or TVB
MF1_	15	E04	.b1 or .b2	_F001		MF1	AE	52	TV or TVB
MF1_	15	E05	.b1 or .b2	_F001		MF1	AE	53	TV or TVB
MF1_	15	E06	.b1 or .b2	_F001		MF1	AE	54	TV or TVB
MF1_	15	E07	.b1 or .b2	_F001		MF1	AE	55	TV or TVB
MF1_	15	E08	.b1 or .b2	_F001		MF1	AE	56	TV or TVB
MF1_	15	E09	.b1 or .b2	_F001		MF1	AE	57	TV or TVB
MF1_	15	E10	.b1 or .b2	_F001		MF1	AE	58	TV or TVB
MF1_	15	E11	.b1 or .b2	_F001		MF1	AE	59	TV or TVB
MF1_	15	E12	.b1 or .b2	_F001		MF1	AE	60	TV or TVB
MF1_	15	F01	.b1 or .b2	_F001		MF1	AE	61	TV or TVB
MF1_	15	F02	.b1 or .b2	_F001		MF1	AE	62	TV or TVB
MF1_	15	F03	.b1 or .b2	_F001		MF1	AE	63	TV or TVB
MF1_	15	F04	.b1 or .b2	_F001		MF1	AE	64	TV or TVB
MF1_	15	F05	.b1 or .b2	_F001		MF1	AE	65	TV or TVB
MF1_	15	F06	.b1 or .b2	_F001		MF1	AE	66	TV or TVB
MF1_	15	F07	.b1 or .b2	_F001		MF1	AE	67	TV or TVB
MF1_	15	F08	.b1 or .b2	_F001		MF1	AE	68	TV or TVB
MF1_	15	F09	.b1 or .b2	_F001		MF1	AE	69	TV or TVB
MF1_	15	F10	.b1 or .b2	_F001		MF1	AE	70	TV or TVB
MF1_	15	F11	.b1 or .b2	_F001		MF1	AE	71	TV or TVB
MF1_	15	F12	.b1 or .b2	_F001		MF1	AE	72	TV or TVB
MF1_	15	G01	.b1 or .b2	_F001		MF1	AE	73	TV or TVB
MF1_	15	G02	.b1 or .b2	_F001		MF1	AE	74	TV or TVB
MF1_	15	G03	.b1 or .b2	_F001		MF1	AE	75	TV or TVB
MF1_	15	G04	.b1 or .b2	_F001		MF1	AE	76	TV or TVB
MF1_	15	G05	.b1 or .b2	_F001		MF1	AE	77	TV or TVB
MF1_	15	G06	.b1 or .b2	_F001		MF1	AE	78	TV or TVB
MF1_	15	G07	.b1 or .b2	_F001		MF1	AE	79	TV or TVB
MF1_	15	G08	.b1 or .b2	_F001		MF1	AE	80	TV or TVB
MF1_	15	G09	.b1 or .b2	_F001		MF1	AE	81	TV or TVB
MF1_	15	G10	.b1 or .b2	_F001		MF1	AE	82	TV or TVB
MF1_	15	G11	.b1 or .b2	_F001		MF1	AE	83	TV or TVB
MF1_	15	G12	.b1 or .b2	_F001		MF1	AE	84	TV or TVB
MF1_	15	H01	.b1 or .b2	_F001		MF1	AE	85	TV or TVB
MF1_	15	H02	.b1 or .b2	_F001		MF1	AE	86	TV or TVB
MF1_	15	H03	.b1 or .b2	_F001		MF1	AE	87	TV or TVB
MF1_	15	H04	.b1 or .b2	_F001		MF1	AE	88	TV or TVB
MF1_	15	H05	.b1 or .b2	_F001		MF1	AE	89	TV or TVB
MF1_	15	H06	.b1 or .b2	_F001		MF1	AE	90	TV or TVB
MF1_	15	H07	.b1 or .b2	_F001		MF1	AE	91	TV or TVB
MF1_	15	H08	.b1 or .b2	_F001		MF1	AE	92	TV or TVB
MF1_	15	H09	.b1 or .b2	_F001		MF1	AE	93	TV or TVB
MF1_	15	H10	.b1 or .b2	_F001		MF1	AE	94	TV or TVB
MF1_	15	H11	.b1 or .b2	_F001		MF1	AE	95	TV or TVB
MF1_	15	H12	.b1 or .b2	_F001		MF1	AE	96	TV or TVB
MF1_	16	A01	.b1 or .b2	_F001		MF1	AF	01	TV or TVB
MF1_	16	A02	.b1 or .b2	_F001		MF1	AF	02	TV or TVB
MF1_	16	A03	.b1 or .b2	_F001		MF1	AF	03	TV or TVB
MF1_	16	A04	.b1 or .b2	_F001		MF1	AF	04	TV or TVB
MF1_	16	A05	.b1 or .b2	_F001		MF1	AF	05	TV or TVB
MF1_	16	A06	.b1 or .b2	_F001		MF1	AF	06	TV or TVB
MF1_	16	A07	.b1 or .b2	_F001		MF1	AF	07	TV or TVB
MF1_	16	A08	.b1 or .b2	_F001		MF1	AF	08	TV or TVB
MF1_	16	A09	.b1 or .b2	_F001		MF1	AF	09	TV or TVB
MF1_	16	A10	.b1 or .b2	_F001		MF1	AF	10	TV or TVB
MF1_	16	A11	.b1 or .b2	_F001		MF1	AF	11	TV or TVB
MF1_	16	A12	.b1 or .b2	_F001		MF1	AF	12	TV or TVB
MF1_	16	B01	.b1 or .b2	_F001		MF1	AF	13	TV or TVB
MF1_	16	B02	.b1 or .b2	_F001		MF1	AF	14	TV or TVB
MF1_	16	B03	.b1 or .b2	_F001		MF1	AF	15	TV or TVB
MF1_	16	B04	.b1 or .b2	_F001		MF1	AF	16	TV or TVB
MF1_	16	B05	.b1 or .b2	_F001		MF1	AF	17	TV or TVB
MF1_	16	B06	.b1 or .b2	_F001		MF1	AF	18	TV or TVB
MF1_	16	B07	.b1 or .b2	_F001		MF1	AF	19	TV or TVB
MF1_	16	B08	.b1 or .b2	_F001		MF1	AF	20	TV or TVB
MF1_	16	B09	.b1 or .b2	_F001		MF1	AF	21	TV or TVB
MF1_	16	B10	.b1 or .b2	_F001		MF1	AF	22	TV or TVB
MF1_	16	B11	.b1 or .b2	_F001		MF1	AF	23	TV or TVB
MF1_	16	B12	.b1 or .b2	_F001		MF1	AF	24	TV or TVB
MF1_	16	C01	.b1 or .b2	_F001		MF1	AF	25	TV or TVB
MF1_	16	C02	.b1 or .b2	_F001		MF1	AF	26	TV or TVB
MF1_	16	C03	.b1 or .b2	_F001		MF1	AF	27	TV or TVB
MF1_	16	C04	.b1 or .b2	_F001		MF1	AF	28	TV or TVB
MF1_	16	C05	.b1 or .b2	_F001		MF1	AF	29	TV or TVB
MF1_	16	C06	.b1 or .b2	_F001		MF1	AF	30	TV or TVB
MF1_	16	C07	.b1 or .b2	_F001		MF1	AF	31	TV or TVB
MF1_	16	C08	.b1 or .b2	_F001		MF1	AF	32	TV or TVB
MF1_	16	C09	.b1 or .b2	_F001		MF1	AF	33	TV or TVB
MF1_	16	C10	.b1 or .b2	_F001		MF1	AF	34	TV or TVB
MF1_	16	C11	.b1 or .b2	_F001		MF1	AF	35	TV or TVB
MF1_	16	C12	.b1 or .b2	_F001		MF1	AF	36	TV or TVB
MF1_	16	D01	.b1 or .b2	_F001		MF1	AF	37	TV or TVB
MF1_	16	D02	.b1 or .b2	_F001		MF1	AF	38	TV or TVB
MF1_	16	D03	.b1 or .b2	_F001		MF1	AF	39	TV or TVB
MF1_	16	D04	.b1 or .b2	_F001		MF1	AF	40	TV or TVB
MF1_	16	D05	.b1 or .b2	_F001		MF1	AF	41	TV or TVB
MF1_	16	D06	.b1 or .b2	_F001		MF1	AF	42	TV or TVB
MF1_	16	D07	.b1 or .b2	_F001		MF1	AF	43	TV or TVB
MF1_	16	D08	.b1 or .b2	_F001		MF1	AF	44	TV or TVB
MF1_	16	D09	.b1 or .b2	_F001		MF1	AF	45	TV or TVB
MF1_	16	D10	.b1 or .b2	_F001		MF1	AF	46	TV or TVB
MF1_	16	D11	.b1 or .b2	_F001		MF1	AF	47	TV or TVB
MF1_	16	D12	.b1 or .b2	_F001		MF1	AF	48	TV or TVB
MF1_	16	E01	.b1 or .b2	_F001		MF1	AF	49	TV or TVB
MF1_	16	E02	.b1 or .b2	_F001		MF1	AF	50	TV or TVB
MF1_	16	E03	.b1 or .b2	_F001		MF1	AF	51	TV or TVB
MF1_	16	E04	.b1 or .b2	_F001		MF1	AF	52	TV or TVB
MF1_	16	E05	.b1 or .b2	_F001		MF1	AF	53	TV or TVB
MF1_	16	E06	.b1 or .b2	_F001		MF1	AF	54	TV or TVB
MF1_	16	E07	.b1 or .b2	_F001		MF1	AF	55	TV or TVB
MF1_	16	E08	.b1 or .b2	_F001		MF1	AF	56	TV or TVB
MF1_	16	E09	.b1 or .b2	_F001		MF1	AF	57	TV or TVB
MF1_	16	E10	.b1 or .b2	_F001		MF1	AF	58	TV or TVB
MF1_	16	E11	.b1 or .b2	_F001		MF1	AF	59	TV or TVB
MF1_	16	E12	.b1 or .b2	_F001		MF1	AF	60	TV or TVB
MF1_	16	F01	.b1 or .b2	_F001		MF1	AF	61	TV or TVB
MF1_	16	F02	.b1 or .b2	_F001		MF1	AF	62	TV or TVB
MF1_	16	F03	.b1 or .b2	_F001		MF1	AF	63	TV or TVB
MF1_	16	F04	.b1 or .b2	_F001		MF1	AF	64	TV or TVB
MF1_	16	F05	.b1 or .b2	_F001		MF1	AF	65	TV or TVB
MF1_	16	F06	.b1 or .b2	_F001		MF1	AF	66	TV or TVB
MF1_	16	F07	.b1 or .b2	_F001		MF1	AF	67	TV or TVB
MF1_	16	F08	.b1 or .b2	_F001		MF1	AF	68	TV or TVB
MF1_	16	F09	.b1 or .b2	_F001		MF1	AF	69	TV or TVB
MF1_	16	F10	.b1 or .b2	_F001		MF1	AF	70	TV or TVB
MF1_	16	F11	.b1 or .b2	_F001		MF1	AF	71	TV or TVB
MF1_	16	F12	.b1 or .b2	_F001		MF1	AF	72	TV or TVB
MF1_	16	G01	.b1 or .b2	_F001		MF1	AF	73	TV or TVB
MF1_	16	G02	.b1 or .b2	_F001		MF1	AF	74	TV or TVB
MF1_	16	G03	.b1 or .b2	_F001		MF1	AF	75	TV or TVB
MF1_	16	G04	.b1 or .b2	_F001		MF1	AF	76	TV or TVB
MF1_	16	G05	.b1 or .b2	_F001		MF1	AF	77	TV or TVB
MF1_	16	G06	.b1 or .b2	_F001		MF1	AF	78	TV or TVB
MF1_	16	G07	.b1 or .b2	_F001		MF1	AF	79	TV or TVB
MF1_	16	G08	.b1 or .b2	_F001		MF1	AF	80	TV or TVB
MF1_	16	G09	.b1 or .b2	_F001		MF1	AF	81	TV or TVB
MF1_	16	G10	.b1 or .b2	_F001		MF1	AF	82	TV or TVB
MF1_	16	G11	.b1 or .b2	_F001		MF1	AF	83	TV or TVB
MF1_	16	G12	.b1 or .b2	_F001		MF1	AF	84	TV or TVB
MF1_	16	H01	.b1 or .b2	_F001		MF1	AF	85	TV or TVB
MF1_	16	H02	.b1 or .b2	_F001		MF1	AF	86	TV or TVB
MF1_	16	H03	.b1 or .b2	_F001		MF1	AF	87	TV or TVB
MF1_	16	H04	.b1 or .b2	_F001		MF1	AF	88	TV or TVB
MF1_	16	H05	.b1 or .b2	_F001		MF1	AF	89	TV or TVB
MF1_	16	H06	.b1 or .b2	_F001		MF1	AF	90	TV or TVB
MF1_	16	H07	.b1 or .b2	_F001		MF1	AF	91	TV or TVB
MF1_	16	H08	.b1 or .b2	_F001		MF1	AF	92	TV or TVB
MF1_	16	H09	.b1 or .b2	_F001		MF1	AF	93	TV or TVB
MF1_	16	H10	.b1 or .b2	_F001		MF1	AF	94	TV or TVB
MF1_	16	H11	.b1 or .b2	_F001		MF1	AF	95	TV or TVB
MF1_	16	H12	.b1 or .b2	_F001		MF1	AF	96	TV or TVB
MF1_	17	A01	.b1 or .b2	_F001		MF1	AG	01	TV or TVB
MF1_	17	A02	.b1 or .b2	_F001		MF1	AG	02	TV or TVB
MF1_	17	A03	.b1 or .b2	_F001		MF1	AG	03	TV or TVB
MF1_	17	A04	.b1 or .b2	_F001		MF1	AG	04	TV or TVB
MF1_	17	A05	.b1 or .b2	_F001		MF1	AG	05	TV or TVB
MF1_	17	A06	.b1 or .b2	_F001		MF1	AG	06	TV or TVB
MF1_	17	A07	.b1 or .b2	_F001		MF1	AG	07	TV or TVB
MF1_	17	A08	.b1 or .b2	_F001		MF1	AG	08	TV or TVB
MF1_	17	A09	.b1 or .b2	_F001		MF1	AG	09	TV or TVB
MF1_	17	A10	.b1 or .b2	_F001		MF1	AG	10	TV or TVB
MF1_	17	A11	.b1 or .b2	_F001		MF1	AG	11	TV or TVB
MF1_	17	A12	.b1 or .b2	_F001		MF1	AG	12	TV or TVB
MF1_	17	B01	.b1 or .b2	_F001		MF1	AG	13	TV or TVB
MF1_	17	B02	.b1 or .b2	_F001		MF1	AG	14	TV or TVB
MF1_	17	B03	.b1 or .b2	_F001		MF1	AG	15	TV or TVB
MF1_	17	B04	.b1 or .b2	_F001		MF1	AG	16	TV or TVB
MF1_	17	B05	.b1 or .b2	_F001		MF1	AG	17	TV or TVB
MF1_	17	B06	.b1 or .b2	_F001		MF1	AG	18	TV or TVB
MF1_	17	B07	.b1 or .b2	_F001		MF1	AG	19	TV or TVB
MF1_	17	B08	.b1 or .b2	_F001		MF1	AG	20	TV or TVB
MF1_	17	B09	.b1 or .b2	_F001		MF1	AG	21	TV or TVB
MF1_	17	B10	.b1 or .b2	_F001		MF1	AG	22	TV or TVB
MF1_	17	B11	.b1 or .b2	_F001		MF1	AG	23	TV or TVB
MF1_	17	B12	.b1 or .b2	_F001		MF1	AG	24	TV or TVB
MF1_	17	C01	.b1 or .b2	_F001		MF1	AG	25	TV or TVB
MF1_	17	C02	.b1 or .b2	_F001		MF1	AG	26	TV or TVB
MF1_	17	C03	.b1 or .b2	_F001		MF1	AG	27	TV or TVB
MF1_	17	C04	.b1 or .b2	_F001		MF1	AG	28	TV or TVB
MF1_	17	C05	.b1 or .b2	_F001		MF1	AG	29	TV or TVB
MF1_	17	C06	.b1 or .b2	_F001		MF1	AG	30	TV or TVB
MF1_	17	C07	.b1 or .b2	_F001		MF1	AG	31	TV or TVB
MF1_	17	C08	.b1 or .b2	_F001		MF1	AG	32	TV or TVB
MF1_	17	C09	.b1 or .b2	_F001		MF1	AG	33	TV or TVB
MF1_	17	C10	.b1 or .b2	_F001		MF1	AG	34	TV or TVB
MF1_	17	C11	.b1 or .b2	_F001		MF1	AG	35	TV or TVB
MF1_	17	C12	.b1 or .b2	_F001		MF1	AG	36	TV or TVB
MF1_	17	D01	.b1 or .b2	_F001		MF1	AG	37	TV or TVB
MF1_	17	D02	.b1 or .b2	_F001		MF1	AG	38	TV or TVB
MF1_	17	D03	.b1 or .b2	_F001		MF1	AG	39	TV or TVB
MF1_	17	D04	.b1 or .b2	_F001		MF1	AG	40	TV or TVB
MF1_	17	D05	.b1 or .b2	_F001		MF1	AG	41	TV or TVB
MF1_	17	D06	.b1 or .b2	_F001		MF1	AG	42	TV or TVB
MF1_	17	D07	.b1 or .b2	_F001		MF1	AG	43	TV or TVB
MF1_	17	D08	.b1 or .b2	_F001		MF1	AG	44	TV or TVB
MF1_	17	D09	.b1 or .b2	_F001		MF1	AG	45	TV or TVB
MF1_	17	D10	.b1 or .b2	_F001		MF1	AG	46	TV or TVB
MF1_	17	D11	.b1 or .b2	_F001		MF1	AG	47	TV or TVB
MF1_	17	D12	.b1 or .b2	_F001		MF1	AG	48	TV or TVB
MF1_	17	E01	.b1 or .b2	_F001		MF1	AG	49	TV or TVB
MF1_	17	E02	.b1 or .b2	_F001		MF1	AG	50	TV or TVB
MF1_	17	E03	.b1 or .b2	_F001		MF1	AG	51	TV or TVB
MF1_	17	E04	.b1 or .b2	_F001		MF1	AG	52	TV or TVB
MF1_	17	E05	.b1 or .b2	_F001		MF1	AG	53	TV or TVB
MF1_	17	E06	.b1 or .b2	_F001		MF1	AG	54	TV or TVB
MF1_	17	E07	.b1 or .b2	_F001		MF1	AG	55	TV or TVB
MF1_	17	E08	.b1 or .b2	_F001		MF1	AG	56	TV or TVB
MF1_	17	E09	.b1 or .b2	_F001		MF1	AG	57	TV or TVB
MF1_	17	E10	.b1 or .b2	_F001		MF1	AG	58	TV or TVB
MF1_	17	E11	.b1 or .b2	_F001		MF1	AG	59	TV or TVB
MF1_	17	E12	.b1 or .b2	_F001		MF1	AG	60	TV or TVB
MF1_	17	F01	.b1 or .b2	_F001		MF1	AG	61	TV or TVB
MF1_	17	F02	.b1 or .b2	_F001		MF1	AG	62	TV or TVB
MF1_	17	F03	.b1 or .b2	_F001		MF1	AG	63	TV or TVB
MF1_	17	F04	.b1 or .b2	_F001		MF1	AG	64	TV or TVB
MF1_	17	F05	.b1 or .b2	_F001		MF1	AG	65	TV or TVB
MF1_	17	F06	.b1 or .b2	_F001		MF1	AG	66	TV or TVB
MF1_	17	F07	.b1 or .b2	_F001		MF1	AG	67	TV or TVB
MF1_	17	F08	.b1 or .b2	_F001		MF1	AG	68	TV or TVB
MF1_	17	F09	.b1 or .b2	_F001		MF1	AG	69	TV or TVB
MF1_	17	F10	.b1 or .b2	_F001		MF1	AG	70	TV or TVB
MF1_	17	F11	.b1 or .b2	_F001		MF1	AG	71	TV or TVB
MF1_	17	F12	.b1 or .b2	_F001		MF1	AG	72	TV or TVB
MF1_	17	G01	.b1 or .b2	_F001		MF1	AG	73	TV or TVB
MF1_	17	G02	.b1 or .b2	_F001		MF1	AG	74	TV or TVB
MF1_	17	G03	.b1 or .b2	_F001		MF1	AG	75	TV or TVB
MF1_	17	G04	.b1 or .b2	_F001		MF1	AG	76	TV or TVB
MF1_	17	G05	.b1 or .b2	_F001		MF1	AG	77	TV or TVB
MF1_	17	G06	.b1 or .b2	_F001		MF1	AG	78	TV or TVB
MF1_	17	G07	.b1 or .b2	_F001		MF1	AG	79	TV or TVB
MF1_	17	G08	.b1 or .b2	_F001		MF1	AG	80	TV or TVB
MF1_	17	G09	.b1 or .b2	_F001		MF1	AG	81	TV or TVB
MF1_	17	G10	.b1 or .b2	_F001		MF1	AG	82	TV or TVB
MF1_	17	G11	.b1 or .b2	_F001		MF1	AG	83	TV or TVB
MF1_	17	G12	.b1 or .b2	_F001		MF1	AG	84	TV or TVB
MF1_	17	H01	.b1 or .b2	_F001		MF1	AG	85	TV or TVB
MF1_	17	H02	.b1 or .b2	_F001		MF1	AG	86	TV or TVB
MF1_	17	H03	.b1 or .b2	_F001		MF1	AG	87	TV or TVB
MF1_	17	H04	.b1 or .b2	_F001		MF1	AG	88	TV or TVB
MF1_	17	H05	.b1 or .b2	_F001		MF1	AG	89	TV or TVB
MF1_	17	H06	.b1 or .b2	_F001		MF1	AG	90	TV or TVB
MF1_	17	H07	.b1 or .b2	_F001		MF1	AG	91	TV or TVB
MF1_	17	H08	.b1 or .b2	_F001		MF1	AG	92	TV or TVB
MF1_	17	H09	.b1 or .b2	_F001		MF1	AG	93	TV or TVB
MF1_	17	H10	.b1 or .b2	_F001		MF1	AG	94	TV or TVB
MF1_	17	H11	.b1 or .b2	_F001		MF1	AG	95	TV or TVB
MF1_	17	H12	.b1 or .b2	_F001		MF1	AG	96	TV or TVB
MF1_	18	A01	.b1 or .b2	_F001		MF1	AH	01	TV or TVB
MF1_	18	A02	.b1 or .b2	_F001		MF1	AH	02	TV or TVB
MF1_	18	A03	.b1 or .b2	_F001		MF1	AH	03	TV or TVB
MF1_	18	A04	.b1 or .b2	_F001		MF1	AH	04	TV or TVB
MF1_	18	A05	.b1 or .b2	_F001		MF1	AH	05	TV or TVB
MF1_	18	A06	.b1 or .b2	_F001		MF1	AH	06	TV or TVB
MF1_	18	A07	.b1 or .b2	_F001		MF1	AH	07	TV or TVB
MF1_	18	A08	.b1 or .b2	_F001		MF1	AH	08	TV or TVB
MF1_	18	A09	.b1 or .b2	_F001		MF1	AH	09	TV or TVB
MF1_	18	A10	.b1 or .b2	_F001		MF1	AH	10	TV or TVB
MF1_	18	A11	.b1 or .b2	_F001		MF1	AH	11	TV or TVB
MF1_	18	A12	.b1 or .b2	_F001		MF1	AH	12	TV or TVB
MF1_	18	B01	.b1 or .b2	_F001		MF1	AH	13	TV or TVB
MF1_	18	B02	.b1 or .b2	_F001		MF1	AH	14	TV or TVB
MF1_	18	B03	.b1 or .b2	_F001		MF1	AH	15	TV or TVB
MF1_	18	B04	.b1 or .b2	_F001		MF1	AH	16	TV or TVB
MF1_	18	B05	.b1 or .b2	_F001		MF1	AH	17	TV or TVB
MF1_	18	B06	.b1 or .b2	_F001		MF1	AH	18	TV or TVB
MF1_	18	B07	.b1 or .b2	_F001		MF1	AH	19	TV or TVB
MF1_	18	B08	.b1 or .b2	_F001		MF1	AH	20	TV or TVB
MF1_	18	B09	.b1 or .b2	_F001		MF1	AH	21	TV or TVB
MF1_	18	B10	.b1 or .b2	_F001		MF1	AH	22	TV or TVB
MF1_	18	B11	.b1 or .b2	_F001		MF1	AH	23	TV or TVB
MF1_	18	B12	.b1 or .b2	_F001		MF1	AH	24	TV or TVB
MF1_	18	C01	.b1 or .b2	_F001		MF1	AH	25	TV or TVB
MF1_	18	C02	.b1 or .b2	_F001		MF1	AH	26	TV or TVB
MF1_	18	C03	.b1 or .b2	_F001		MF1	AH	27	TV or TVB
MF1_	18	C04	.b1 or .b2	_F001		MF1	AH	28	TV or TVB
MF1_	18	C05	.b1 or .b2	_F001		MF1	AH	29	TV or TVB
MF1_	18	C06	.b1 or .b2	_F001		MF1	AH	30	TV or TVB
MF1_	18	C07	.b1 or .b2	_F001		MF1	AH	31	TV or TVB
MF1_	18	C08	.b1 or .b2	_F001		MF1	AH	32	TV or TVB
MF1_	18	C09	.b1 or .b2	_F001		MF1	AH	33	TV or TVB
MF1_	18	C10	.b1 or .b2	_F001		MF1	AH	34	TV or TVB
MF1_	18	C11	.b1 or .b2	_F001		MF1	AH	35	TV or TVB
MF1_	18	C12	.b1 or .b2	_F001		MF1	AH	36	TV or TVB
MF1_	18	D01	.b1 or .b2	_F001		MF1	AH	37	TV or TVB
MF1_	18	D02	.b1 or .b2	_F001		MF1	AH	38	TV or TVB
MF1_	18	D03	.b1 or .b2	_F001		MF1	AH	39	TV or TVB
MF1_	18	D04	.b1 or .b2	_F001		MF1	AH	40	TV or TVB
MF1_	18	D05	.b1 or .b2	_F001		MF1	AH	41	TV or TVB
MF1_	18	D06	.b1 or .b2	_F001		MF1	AH	42	TV or TVB
MF1_	18	D07	.b1 or .b2	_F001		MF1	AH	43	TV or TVB
MF1_	18	D08	.b1 or .b2	_F001		MF1	AH	44	TV or TVB
MF1_	18	D09	.b1 or .b2	_F001		MF1	AH	45	TV or TVB
MF1_	18	D10	.b1 or .b2	_F001		MF1	AH	46	TV or TVB
MF1_	18	D11	.b1 or .b2	_F001		MF1	AH	47	TV or TVB
MF1_	18	D12	.b1 or .b2	_F001		MF1	AH	48	TV or TVB
MF1_	18	E01	.b1 or .b2	_F001		MF1	AH	49	TV or TVB
MF1_	18	E02	.b1 or .b2	_F001		MF1	AH	50	TV or TVB
MF1_	18	E03	.b1 or .b2	_F001		MF1	AH	51	TV or TVB
MF1_	18	E04	.b1 or .b2	_F001		MF1	AH	52	TV or TVB
MF1_	18	E05	.b1 or .b2	_F001		MF1	AH	53	TV or TVB
MF1_	18	E06	.b1 or .b2	_F001		MF1	AH	54	TV or TVB
MF1_	18	E07	.b1 or .b2	_F001		MF1	AH	55	TV or TVB
MF1_	18	E08	.b1 or .b2	_F001		MF1	AH	56	TV or TVB
MF1_	18	E09	.b1 or .b2	_F001		MF1	AH	57	TV or TVB
MF1_	18	E10	.b1 or .b2	_F001		MF1	AH	58	TV or TVB
MF1_	18	E11	.b1 or .b2	_F001		MF1	AH	59	TV or TVB
MF1_	18	E12	.b1 or .b2	_F001		MF1	AH	60	TV or TVB
MF1_	18	F01	.b1 or .b2	_F001		MF1	AH	61	TV or TVB
MF1_	18	F02	.b1 or .b2	_F001		MF1	AH	62	TV or TVB
MF1_	18	F03	.b1 or .b2	_F001		MF1	AH	63	TV or TVB
MF1_	18	F04	.b1 or .b2	_F001		MF1	AH	64	TV or TVB
MF1_	18	F05	.b1 or .b2	_F001		MF1	AH	65	TV or TVB
MF1_	18	F06	.b1 or .b2	_F001		MF1	AH	66	TV or TVB
MF1_	18	F07	.b1 or .b2	_F001		MF1	AH	67	TV or TVB
MF1_	18	F08	.b1 or .b2	_F001		MF1	AH	68	TV or TVB
MF1_	18	F09	.b1 or .b2	_F001		MF1	AH	69	TV or TVB
MF1_	18	F10	.b1 or .b2	_F001		MF1	AH	70	TV or TVB
MF1_	18	F11	.b1 or .b2	_F001		MF1	AH	71	TV or TVB
MF1_	18	F12	.b1 or .b2	_F001		MF1	AH	72	TV or TVB
MF1_	18	G01	.b1 or .b2	_F001		MF1	AH	73	TV or TVB
MF1_	18	G02	.b1 or .b2	_F001		MF1	AH	74	TV or TVB
MF1_	18	G03	.b1 or .b2	_F001		MF1	AH	75	TV or TVB
MF1_	18	G04	.b1 or .b2	_F001		MF1	AH	76	TV or TVB
MF1_	18	G05	.b1 or .b2	_F001		MF1	AH	77	TV or TVB
MF1_	18	G06	.b1 or .b2	_F001		MF1	AH	78	TV or TVB
MF1_	18	G07	.b1 or .b2	_F001		MF1	AH	79	TV or TVB
MF1_	18	G08	.b1 or .b2	_F001		MF1	AH	80	TV or TVB
MF1_	18	G09	.b1 or .b2	_F001		MF1	AH	81	TV or TVB
MF1_	18	G10	.b1 or .b2	_F001		MF1	AH	82	TV or TVB
MF1_	18	G11	.b1 or .b2	_F001		MF1	AH	83	TV or TVB
MF1_	18	G12	.b1 or .b2	_F001		MF1	AH	84	TV or TVB
MF1_	18	H01	.b1 or .b2	_F001		MF1	AH	85	TV or TVB
MF1_	18	H02	.b1 or .b2	_F001		MF1	AH	86	TV or TVB
MF1_	18	H03	.b1 or .b2	_F001		MF1	AH	87	TV or TVB
MF1_	18	H04	.b1 or .b2	_F001		MF1	AH	88	TV or TVB
MF1_	18	H05	.b1 or .b2	_F001		MF1	AH	89	TV or TVB
MF1_	18	H06	.b1 or .b2	_F001		MF1	AH	90	TV or TVB
MF1_	18	H07	.b1 or .b2	_F001		MF1	AH	91	TV or TVB
MF1_	18	H08	.b1 or .b2	_F001		MF1	AH	92	TV or TVB
MF1_	18	H09	.b1 or .b2	_F001		MF1	AH	93	TV or TVB
MF1_	18	H10	.b1 or .b2	_F001		MF1	AH	94	TV or TVB
MF1_	18	H11	.b1 or .b2	_F001		MF1	AH	95	TV or TVB
MF1_	18	H12	.b1 or .b2	_F001		MF1	AH	96	TV or TVB
MF1_	19	A01	.b1 or .b2	_F001		MF1	AI	01	TV or TVB
MF1_	19	A02	.b1 or .b2	_F001		MF1	AI	02	TV or TVB
MF1_	19	A03	.b1 or .b2	_F001		MF1	AI	03	TV or TVB
MF1_	19	A04	.b1 or .b2	_F001		MF1	AI	04	TV or TVB
MF1_	19	A05	.b1 or .b2	_F001		MF1	AI	05	TV or TVB
MF1_	19	A06	.b1 or .b2	_F001		MF1	AI	06	TV or TVB
MF1_	19	A07	.b1 or .b2	_F001		MF1	AI	07	TV or TVB
MF1_	19	A08	.b1 or .b2	_F001		MF1	AI	08	TV or TVB
MF1_	19	A09	.b1 or .b2	_F001		MF1	AI	09	TV or TVB
MF1_	19	A10	.b1 or .b2	_F001		MF1	AI	10	TV or TVB
MF1_	19	A11	.b1 or .b2	_F001		MF1	AI	11	TV or TVB
MF1_	19	A12	.b1 or .b2	_F001		MF1	AI	12	TV or TVB
MF1_	19	B01	.b1 or .b2	_F001		MF1	AI	13	TV or TVB
MF1_	19	B02	.b1 or .b2	_F001		MF1	AI	14	TV or TVB
MF1_	19	B03	.b1 or .b2	_F001		MF1	AI	15	TV or TVB
MF1_	19	B04	.b1 or .b2	_F001		MF1	AI	16	TV or TVB
MF1_	19	B05	.b1 or .b2	_F001		MF1	AI	17	TV or TVB
MF1_	19	B06	.b1 or .b2	_F001		MF1	AI	18	TV or TVB
MF1_	19	B07	.b1 or .b2	_F001		MF1	AI	19	TV or TVB
MF1_	19	B08	.b1 or .b2	_F001		MF1	AI	20	TV or TVB
MF1_	19	B09	.b1 or .b2	_F001		MF1	AI	21	TV or TVB
MF1_	19	B10	.b1 or .b2	_F001		MF1	AI	22	TV or TVB
MF1_	19	B11	.b1 or .b2	_F001		MF1	AI	23	TV or TVB
MF1_	19	B12	.b1 or .b2	_F001		MF1	AI	24	TV or TVB
MF1_	19	C01	.b1 or .b2	_F001		MF1	AI	25	TV or TVB
MF1_	19	C02	.b1 or .b2	_F001		MF1	AI	26	TV or TVB
MF1_	19	C03	.b1 or .b2	_F001		MF1	AI	27	TV or TVB
MF1_	19	C04	.b1 or .b2	_F001		MF1	AI	28	TV or TVB
MF1_	19	C05	.b1 or .b2	_F001		MF1	AI	29	TV or TVB
MF1_	19	C06	.b1 or .b2	_F001		MF1	AI	30	TV or TVB
MF1_	19	C07	.b1 or .b2	_F001		MF1	AI	31	TV or TVB
MF1_	19	C08	.b1 or .b2	_F001		MF1	AI	32	TV or TVB
MF1_	19	C09	.b1 or .b2	_F001		MF1	AI	33	TV or TVB
MF1_	19	C10	.b1 or .b2	_F001		MF1	AI	34	TV or TVB
MF1_	19	C11	.b1 or .b2	_F001		MF1	AI	35	TV or TVB
MF1_	19	C12	.b1 or .b2	_F001		MF1	AI	36	TV or TVB
MF1_	19	D01	.b1 or .b2	_F001		MF1	AI	37	TV or TVB
MF1_	19	D02	.b1 or .b2	_F001		MF1	AI	38	TV or TVB
MF1_	19	D03	.b1 or .b2	_F001		MF1	AI	39	TV or TVB
MF1_	19	D04	.b1 or .b2	_F001		MF1	AI	40	TV or TVB
MF1_	19	D05	.b1 or .b2	_F001		MF1	AI	41	TV or TVB
MF1_	19	D06	.b1 or .b2	_F001		MF1	AI	42	TV or TVB
MF1_	19	D07	.b1 or .b2	_F001		MF1	AI	43	TV or TVB
MF1_	19	D08	.b1 or .b2	_F001		MF1	AI	44	TV or TVB
MF1_	19	D09	.b1 or .b2	_F001		MF1	AI	45	TV or TVB
MF1_	19	D10	.b1 or .b2	_F001		MF1	AI	46	TV or TVB
MF1_	19	D11	.b1 or .b2	_F001		MF1	AI	47	TV or TVB
MF1_	19	D12	.b1 or .b2	_F001		MF1	AI	48	TV or TVB
MF1_	19	E01	.b1 or .b2	_F001		MF1	AI	49	TV or TVB
MF1_	19	E02	.b1 or .b2	_F001		MF1	AI	50	TV or TVB
MF1_	19	E03	.b1 or .b2	_F001		MF1	AI	51	TV or TVB
MF1_	19	E04	.b1 or .b2	_F001		MF1	AI	52	TV or TVB
MF1_	19	E05	.b1 or .b2	_F001		MF1	AI	53	TV or TVB
MF1_	19	E06	.b1 or .b2	_F001		MF1	AI	54	TV or TVB
MF1_	19	E07	.b1 or .b2	_F001		MF1	AI	55	TV or TVB
MF1_	19	E08	.b1 or .b2	_F001		MF1	AI	56	TV or TVB
MF1_	19	E09	.b1 or .b2	_F001		MF1	AI	57	TV or TVB
MF1_	19	E10	.b1 or .b2	_F001		MF1	AI	58	TV or TVB
MF1_	19	E11	.b1 or .b2	_F001		MF1	AI	59	TV or TVB
MF1_	19	E12	.b1 or .b2	_F001		MF1	AI	60	TV or TVB
MF1_	19	F01	.b1 or .b2	_F001		MF1	AI	61	TV or TVB
MF1_	19	F02	.b1 or .b2	_F001		MF1	AI	62	TV or TVB
MF1_	19	F03	.b1 or .b2	_F001		MF1	AI	63	TV or TVB
MF1_	19	F04	.b1 or .b2	_F001		MF1	AI	64	TV or TVB
MF1_	19	F05	.b1 or .b2	_F001		MF1	AI	65	TV or TVB
MF1_	19	F06	.b1 or .b2	_F001		MF1	AI	66	TV or TVB
MF1_	19	F07	.b1 or .b2	_F001		MF1	AI	67	TV or TVB
MF1_	19	F08	.b1 or .b2	_F001		MF1	AI	68	TV or TVB
MF1_	19	F09	.b1 or .b2	_F001		MF1	AI	69	TV or TVB
MF1_	19	F10	.b1 or .b2	_F001		MF1	AI	70	TV or TVB
MF1_	19	F11	.b1 or .b2	_F001		MF1	AI	71	TV or TVB
MF1_	19	F12	.b1 or .b2	_F001		MF1	AI	72	TV or TVB
MF1_	19	G01	.b1 or .b2	_F001		MF1	AI	73	TV or TVB
MF1_	19	G02	.b1 or .b2	_F001		MF1	AI	74	TV or TVB
MF1_	19	G03	.b1 or .b2	_F001		MF1	AI	75	TV or TVB
MF1_	19	G04	.b1 or .b2	_F001		MF1	AI	76	TV or TVB
MF1_	19	G05	.b1 or .b2	_F001		MF1	AI	77	TV or TVB
MF1_	19	G06	.b1 or .b2	_F001		MF1	AI	78	TV or TVB
MF1_	19	G07	.b1 or .b2	_F001		MF1	AI	79	TV or TVB
MF1_	19	G08	.b1 or .b2	_F001		MF1	AI	80	TV or TVB
MF1_	19	G09	.b1 or .b2	_F001		MF1	AI	81	TV or TVB
MF1_	19	G10	.b1 or .b2	_F001		MF1	AI	82	TV or TVB
MF1_	19	G11	.b1 or .b2	_F001		MF1	AI	83	TV or TVB
MF1_	19	G12	.b1 or .b2	_F001		MF1	AI	84	TV or TVB
MF1_	19	H01	.b1 or .b2	_F001		MF1	AI	85	TV or TVB
MF1_	19	H02	.b1 or .b2	_F001		MF1	AI	86	TV or TVB
MF1_	19	H03	.b1 or .b2	_F001		MF1	AI	87	TV or TVB
MF1_	19	H04	.b1 or .b2	_F001		MF1	AI	88	TV or TVB
MF1_	19	H05	.b1 or .b2	_F001		MF1	AI	89	TV or TVB
MF1_	19	H06	.b1 or .b2	_F001		MF1	AI	90	TV or TVB
MF1_	19	H07	.b1 or .b2	_F001		MF1	AI	91	TV or TVB
MF1_	19	H08	.b1 or .b2	_F001		MF1	AI	92	TV or TVB
MF1_	19	H09	.b1 or .b2	_F001		MF1	AI	93	TV or TVB
MF1_	19	H10	.b1 or .b2	_F001		MF1	AI	94	TV or TVB
MF1_	19	H11	.b1 or .b2	_F001		MF1	AI	95	TV or TVB
MF1_	19	H12	.b1 or .b2	_F001		MF1	AI	96	TV or TVB
MF1_	20	A01	.b1 or .b2	_F001		MF1	AJ	01	TV or TVB
MF1_	20	A02	.b1 or .b2	_F001		MF1	AJ	02	TV or TVB
MF1_	20	A03	.b1 or .b2	_F001		MF1	AJ	03	TV or TVB
MF1_	20	A04	.b1 or .b2	_F001		MF1	AJ	04	TV or TVB
MF1_	20	A05	.b1 or .b2	_F001		MF1	AJ	05	TV or TVB
MF1_	20	A06	.b1 or .b2	_F001		MF1	AJ	06	TV or TVB
MF1_	20	A07	.b1 or .b2	_F001		MF1	AJ	07	TV or TVB
MF1_	20	A08	.b1 or .b2	_F001		MF1	AJ	08	TV or TVB
MF1_	20	A09	.b1 or .b2	_F001		MF1	AJ	09	TV or TVB
MF1_	20	A10	.b1 or .b2	_F001		MF1	AJ	10	TV or TVB
MF1_	20	A11	.b1 or .b2	_F001		MF1	AJ	11	TV or TVB
MF1_	20	A12	.b1 or .b2	_F001		MF1	AJ	12	TV or TVB
MF1_	20	B01	.b1 or .b2	_F001		MF1	AJ	13	TV or TVB
MF1_	20	B02	.b1 or .b2	_F001		MF1	AJ	14	TV or TVB
MF1_	20	B03	.b1 or .b2	_F001		MF1	AJ	15	TV or TVB
MF1_	20	B04	.b1 or .b2	_F001		MF1	AJ	16	TV or TVB
MF1_	20	B05	.b1 or .b2	_F001		MF1	AJ	17	TV or TVB
MF1_	20	B06	.b1 or .b2	_F001		MF1	AJ	18	TV or TVB
MF1_	20	B07	.b1 or .b2	_F001		MF1	AJ	19	TV or TVB
MF1_	20	B08	.b1 or .b2	_F001		MF1	AJ	20	TV or TVB
MF1_	20	B09	.b1 or .b2	_F001		MF1	AJ	21	TV or TVB
MF1_	20	B10	.b1 or .b2	_F001		MF1	AJ	22	TV or TVB
MF1_	20	B11	.b1 or .b2	_F001		MF1	AJ	23	TV or TVB
MF1_	20	B12	.b1 or .b2	_F001		MF1	AJ	24	TV or TVB
MF1_	20	C01	.b1 or .b2	_F001		MF1	AJ	25	TV or TVB
MF1_	20	C02	.b1 or .b2	_F001		MF1	AJ	26	TV or TVB
MF1_	20	C03	.b1 or .b2	_F001		MF1	AJ	27	TV or TVB
MF1_	20	C04	.b1 or .b2	_F001		MF1	AJ	28	TV or TVB
MF1_	20	C05	.b1 or .b2	_F001		MF1	AJ	29	TV or TVB
MF1_	20	C06	.b1 or .b2	_F001		MF1	AJ	30	TV or TVB
MF1_	20	C07	.b1 or .b2	_F001		MF1	AJ	31	TV or TVB
MF1_	20	C08	.b1 or .b2	_F001		MF1	AJ	32	TV or TVB
MF1_	20	C09	.b1 or .b2	_F001		MF1	AJ	33	TV or TVB
MF1_	20	C10	.b1 or .b2	_F001		MF1	AJ	34	TV or TVB
MF1_	20	C11	.b1 or .b2	_F001		MF1	AJ	35	TV or TVB
MF1_	20	C12	.b1 or .b2	_F001		MF1	AJ	36	TV or TVB
MF1_	20	D01	.b1 or .b2	_F001		MF1	AJ	37	TV or TVB
MF1_	20	D02	.b1 or .b2	_F001		MF1	AJ	38	TV or TVB
MF1_	20	D03	.b1 or .b2	_F001		MF1	AJ	39	TV or TVB
MF1_	20	D04	.b1 or .b2	_F001		MF1	AJ	40	TV or TVB
MF1_	20	D05	.b1 or .b2	_F001		MF1	AJ	41	TV or TVB
MF1_	20	D06	.b1 or .b2	_F001		MF1	AJ	42	TV or TVB
MF1_	20	D07	.b1 or .b2	_F001		MF1	AJ	43	TV or TVB
MF1_	20	D08	.b1 or .b2	_F001		MF1	AJ	44	TV or TVB
MF1_	20	D09	.b1 or .b2	_F001		MF1	AJ	45	TV or TVB
MF1_	20	D10	.b1 or .b2	_F001		MF1	AJ	46	TV or TVB
MF1_	20	D11	.b1 or .b2	_F001		MF1	AJ	47	TV or TVB
MF1_	20	D12	.b1 or .b2	_F001		MF1	AJ	48	TV or TVB
MF1_	20	E01	.b1 or .b2	_F001		MF1	AJ	49	TV or TVB
MF1_	20	E02	.b1 or .b2	_F001		MF1	AJ	50	TV or TVB
MF1_	20	E03	.b1 or .b2	_F001		MF1	AJ	51	TV or TVB
MF1_	20	E04	.b1 or .b2	_F001		MF1	AJ	52	TV or TVB
MF1_	20	E05	.b1 or .b2	_F001		MF1	AJ	53	TV or TVB
MF1_	20	E06	.b1 or .b2	_F001		MF1	AJ	54	TV or TVB
MF1_	20	E07	.b1 or .b2	_F001		MF1	AJ	55	TV or TVB
MF1_	20	E08	.b1 or .b2	_F001		MF1	AJ	56	TV or TVB
MF1_	20	E09	.b1 or .b2	_F001		MF1	AJ	57	TV or TVB
MF1_	20	E10	.b1 or .b2	_F001		MF1	AJ	58	TV or TVB
MF1_	20	E11	.b1 or .b2	_F001		MF1	AJ	59	TV or TVB
MF1_	20	E12	.b1 or .b2	_F001		MF1	AJ	60	TV or TVB
MF1_	20	F01	.b1 or .b2	_F001		MF1	AJ	61	TV or TVB
MF1_	20	F02	.b1 or .b2	_F001		MF1	AJ	62	TV or TVB
MF1_	20	F03	.b1 or .b2	_F001		MF1	AJ	63	TV or TVB
MF1_	20	F04	.b1 or .b2	_F001		MF1	AJ	64	TV or TVB
MF1_	20	F05	.b1 or .b2	_F001		MF1	AJ	65	TV or TVB
MF1_	20	F06	.b1 or .b2	_F001		MF1	AJ	66	TV or TVB
MF1_	20	F07	.b1 or .b2	_F001		MF1	AJ	67	TV or TVB
MF1_	20	F08	.b1 or .b2	_F001		MF1	AJ	68	TV or TVB
MF1_	20	F09	.b1 or .b2	_F001		MF1	AJ	69	TV or TVB
MF1_	20	F10	.b1 or .b2	_F001		MF1	AJ	70	TV or TVB
MF1_	20	F11	.b1 or .b2	_F001		MF1	AJ	71	TV or TVB
MF1_	20	F12	.b1 or .b2	_F001		MF1	AJ	72	TV or TVB
MF1_	20	G01	.b1 or .b2	_F001		MF1	AJ	73	TV or TVB
MF1_	20	G02	.b1 or .b2	_F001		MF1	AJ	74	TV or TVB
MF1_	20	G03	.b1 or .b2	_F001		MF1	AJ	75	TV or TVB
MF1_	20	G04	.b1 or .b2	_F001		MF1	AJ	76	TV or TVB
MF1_	20	G05	.b1 or .b2	_F001		MF1	AJ	77	TV or TVB
MF1_	20	G06	.b1 or .b2	_F001		MF1	AJ	78	TV or TVB
MF1_	20	G07	.b1 or .b2	_F001		MF1	AJ	79	TV or TVB
MF1_	20	G08	.b1 or .b2	_F001		MF1	AJ	80	TV or TVB
MF1_	20	G09	.b1 or .b2	_F001		MF1	AJ	81	TV or TVB
MF1_	20	G10	.b1 or .b2	_F001		MF1	AJ	82	TV or TVB
MF1_	20	G11	.b1 or .b2	_F001		MF1	AJ	83	TV or TVB
MF1_	20	G12	.b1 or .b2	_F001		MF1	AJ	84	TV or TVB
MF1_	20	H01	.b1 or .b2	_F001		MF1	AJ	85	TV or TVB
MF1_	20	H02	.b1 or .b2	_F001		MF1	AJ	86	TV or TVB
MF1_	20	H03	.b1 or .b2	_F001		MF1	AJ	87	TV or TVB
MF1_	20	H04	.b1 or .b2	_F001		MF1	AJ	88	TV or TVB
MF1_	20	H05	.b1 or .b2	_F001		MF1	AJ	89	TV or TVB
MF1_	20	H06	.b1 or .b2	_F001		MF1	AJ	90	TV or TVB
MF1_	20	H07	.b1 or .b2	_F001		MF1	AJ	91	TV or TVB
MF1_	20	H08	.b1 or .b2	_F001		MF1	AJ	92	TV or TVB
MF1_	20	H09	.b1 or .b2	_F001		MF1	AJ	93	TV or TVB
MF1_	20	H10	.b1 or .b2	_F001		MF1	AJ	94	TV or TVB
MF1_	20	H11	.b1 or .b2	_F001		MF1	AJ	95	TV or TVB
MF1_	20	H12	.b1 or .b2	_F001		MF1	AJ	96	TV or TVB
MF1_	21	A01	.b1 or .b2	_F001		MF1	AK	01	TV or TVB
MF1_	21	A02	.b1 or .b2	_F001		MF1	AK	02	TV or TVB
MF1_	21	A03	.b1 or .b2	_F001		MF1	AK	03	TV or TVB
MF1_	21	A04	.b1 or .b2	_F001		MF1	AK	04	TV or TVB
MF1_	21	A05	.b1 or .b2	_F001		MF1	AK	05	TV or TVB
MF1_	21	A06	.b1 or .b2	_F001		MF1	AK	06	TV or TVB
MF1_	21	A07	.b1 or .b2	_F001		MF1	AK	07	TV or TVB
MF1_	21	A08	.b1 or .b2	_F001		MF1	AK	08	TV or TVB
MF1_	21	A09	.b1 or .b2	_F001		MF1	AK	09	TV or TVB
MF1_	21	A10	.b1 or .b2	_F001		MF1	AK	10	TV or TVB
MF1_	21	A11	.b1 or .b2	_F001		MF1	AK	11	TV or TVB
MF1_	21	A12	.b1 or .b2	_F001		MF1	AK	12	TV or TVB
MF1_	21	B01	.b1 or .b2	_F001		MF1	AK	13	TV or TVB
MF1_	21	B02	.b1 or .b2	_F001		MF1	AK	14	TV or TVB
MF1_	21	B03	.b1 or .b2	_F001		MF1	AK	15	TV or TVB
MF1_	21	B04	.b1 or .b2	_F001		MF1	AK	16	TV or TVB
MF1_	21	B05	.b1 or .b2	_F001		MF1	AK	17	TV or TVB
MF1_	21	B06	.b1 or .b2	_F001		MF1	AK	18	TV or TVB
MF1_	21	B07	.b1 or .b2	_F001		MF1	AK	19	TV or TVB
MF1_	21	B08	.b1 or .b2	_F001		MF1	AK	20	TV or TVB
MF1_	21	B09	.b1 or .b2	_F001		MF1	AK	21	TV or TVB
MF1_	21	B10	.b1 or .b2	_F001		MF1	AK	22	TV or TVB
MF1_	21	B11	.b1 or .b2	_F001		MF1	AK	23	TV or TVB
MF1_	21	B12	.b1 or .b2	_F001		MF1	AK	24	TV or TVB
MF1_	21	C01	.b1 or .b2	_F001		MF1	AK	25	TV or TVB
MF1_	21	C02	.b1 or .b2	_F001		MF1	AK	26	TV or TVB
MF1_	21	C03	.b1 or .b2	_F001		MF1	AK	27	TV or TVB
MF1_	21	C04	.b1 or .b2	_F001		MF1	AK	28	TV or TVB
MF1_	21	C05	.b1 or .b2	_F001		MF1	AK	29	TV or TVB
MF1_	21	C06	.b1 or .b2	_F001		MF1	AK	30	TV or TVB
MF1_	21	C07	.b1 or .b2	_F001		MF1	AK	31	TV or TVB
MF1_	21	C08	.b1 or .b2	_F001		MF1	AK	32	TV or TVB
MF1_	21	C09	.b1 or .b2	_F001		MF1	AK	33	TV or TVB
MF1_	21	C10	.b1 or .b2	_F001		MF1	AK	34	TV or TVB
MF1_	21	C11	.b1 or .b2	_F001		MF1	AK	35	TV or TVB
MF1_	21	C12	.b1 or .b2	_F001		MF1	AK	36	TV or TVB
MF1_	21	D01	.b1 or .b2	_F001		MF1	AK	37	TV or TVB
MF1_	21	D02	.b1 or .b2	_F001		MF1	AK	38	TV or TVB
MF1_	21	D03	.b1 or .b2	_F001		MF1	AK	39	TV or TVB
MF1_	21	D04	.b1 or .b2	_F001		MF1	AK	40	TV or TVB
MF1_	21	D05	.b1 or .b2	_F001		MF1	AK	41	TV or TVB
MF1_	21	D06	.b1 or .b2	_F001		MF1	AK	42	TV or TVB
MF1_	21	D07	.b1 or .b2	_F001		MF1	AK	43	TV or TVB
MF1_	21	D08	.b1 or .b2	_F001		MF1	AK	44	TV or TVB
MF1_	21	D09	.b1 or .b2	_F001		MF1	AK	45	TV or TVB
MF1_	21	D10	.b1 or .b2	_F001		MF1	AK	46	TV or TVB
MF1_	21	D11	.b1 or .b2	_F001		MF1	AK	47	TV or TVB
MF1_	21	D12	.b1 or .b2	_F001		MF1	AK	48	TV or TVB
MF1_	21	E01	.b1 or .b2	_F001		MF1	AK	49	TV or TVB
MF1_	21	E02	.b1 or .b2	_F001		MF1	AK	50	TV or TVB
MF1_	21	E03	.b1 or .b2	_F001		MF1	AK	51	TV or TVB
MF1_	21	E04	.b1 or .b2	_F001		MF1	AK	52	TV or TVB
MF1_	21	E05	.b1 or .b2	_F001		MF1	AK	53	TV or TVB
MF1_	21	E06	.b1 or .b2	_F001		MF1	AK	54	TV or TVB
MF1_	21	E07	.b1 or .b2	_F001		MF1	AK	55	TV or TVB
MF1_	21	E08	.b1 or .b2	_F001		MF1	AK	56	TV or TVB
MF1_	21	E09	.b1 or .b2	_F001		MF1	AK	57	TV or TVB
MF1_	21	E10	.b1 or .b2	_F001		MF1	AK	58	TV or TVB
MF1_	21	E11	.b1 or .b2	_F001		MF1	AK	59	TV or TVB
MF1_	21	E12	.b1 or .b2	_F001		MF1	AK	60	TV or TVB
MF1_	21	F01	.b1 or .b2	_F001		MF1	AK	61	TV or TVB
MF1_	21	F02	.b1 or .b2	_F001		MF1	AK	62	TV or TVB
MF1_	21	F03	.b1 or .b2	_F001		MF1	AK	63	TV or TVB
MF1_	21	F04	.b1 or .b2	_F001		MF1	AK	64	TV or TVB
MF1_	21	F05	.b1 or .b2	_F001		MF1	AK	65	TV or TVB
MF1_	21	F06	.b1 or .b2	_F001		MF1	AK	66	TV or TVB
MF1_	21	F07	.b1 or .b2	_F001		MF1	AK	67	TV or TVB
MF1_	21	F08	.b1 or .b2	_F001		MF1	AK	68	TV or TVB
MF1_	21	F09	.b1 or .b2	_F001		MF1	AK	69	TV or TVB
MF1_	21	F10	.b1 or .b2	_F001		MF1	AK	70	TV or TVB
MF1_	21	F11	.b1 or .b2	_F001		MF1	AK	71	TV or TVB
MF1_	21	F12	.b1 or .b2	_F001		MF1	AK	72	TV or TVB
MF1_	21	G01	.b1 or .b2	_F001		MF1	AK	73	TV or TVB
MF1_	21	G02	.b1 or .b2	_F001		MF1	AK	74	TV or TVB
MF1_	21	G03	.b1 or .b2	_F001		MF1	AK	75	TV or TVB
MF1_	21	G04	.b1 or .b2	_F001		MF1	AK	76	TV or TVB
[truncated: 15,380 more rows]
