# Supplementary material for: Genes affecting novel seed constituents in Limnanthes alba Benth: transcriptome analysis of developing embryos and a new genetic map of meadowfoam
Source: PeerJ. 2015 May 19;3:e915. doi: 10.7717/peerj.915 (PMC4451031; doi:10.7717/peerj.915)
Supplement: Table S3 [file peerj-03-915-s004.xls]

## Sheet: Sheet1
Meadowfoam SSRs mined from EST and methylation-filtered genomic libraries: Repeat motifs, primer sequences, and reference sequence identifiers.
Marker	SSR source	Repeat motif	Repeat number	Repeat length	Ref allele size (bp)	Primer left	Primer right	TIGR Source Sequence	Orion Source Sequence
MF625	EST lib	AAAT	5	20	266	CCTGATCTCCTATTTCGCCA	GCAAATGTATTGGTTAATAAAAAGAA	MF1CX63TV
MF626	EST lib	AAC	5	15	227	GTTCAGAATTTGCTTGGGGA	AAGGCTAGGCACCTGGAAAT	MF1CU09TV
MF627	EST lib	AAC	6	18	177	GTTGAAGTCTCCGGGTCAGT	AAAATCCATGAACCCCTTCC	MF1BT92TV
MF628	EST lib	AAG	5	15	169	TTCTGGTGATGATGAAGGCA	AGCAGCAGCAACATGAAATG	MF1BW18TV
MF629	EST lib	AAG	5	15	254	AAACCAGTATCGAAATGGCG	GTTCATGATTCCCATTGCCT	TC1108
MF630	EST lib	AC	8	16	182	GTTTGTGCCAACTTCCACCT	TTGTCAACATTCACCTCCACA	TC78
MF631	EST lib	ACA	6	18	118	GCGAAAAGATGGAGAACAGC	GAGAGGACGGTGCTGCTAAC	MF1AA65TVB
MF632	EST lib	ACTCCT	5	30	231	ACGATGCAAAAATCGTAGGG	TCCCAACCCCAAAATCATTA	TC901
MF633	EST lib	AG	6	12	113	CGTTAGACGAGGTTTGACGA	GTGAAGATGAGCGAAGAGGC	TC678
MF634	EST lib	AG	6	12	131	TGCGTTTTGAGAGAGACTGAGA	CTTTCTCGAGGCAAGGTTTG	TC1346
MF635	EST lib	AG	6	12	140	GCATCACAAACTCTATACCTATCTTTT	AAGCGCATTGTAGCCTCAGT	MF1DT29TV
MF636	EST lib	AG	6	12	155	GATTCTCCATCACAAACTCTATACC	CATAGTCTCAGCAAAGCGCA	TC882
MF637	EST lib	AG	6	12	178	TCAATAGAAGTAGAGAAAGCTAGAAGG	GTTTCCTTGCCTCTTCTTCC	MF1BY47TV
MF638	EST lib	AG	6	12	184	GGACAGTCTTCTTCGTCGTCA	ACCCAAAACCACATGAGAGC	TC354
MF639	EST lib	AG	6	12	191	CCACAAAAGAAGACACACACC	ATCTAGTGGCCAACAAACCG	TC429
MF640	EST lib	AG	6	12	196	AAACGATTTTCTTCAACCACTTG	GCTGTTCCATAAGCTGCTCC	TC637
MF641	EST lib	AG	6	12	202	AAGCAGAATACTCCCCCGAG	TGGCTGTTTCATTTCATTATGG	MF1CE45TV
MF642	EST lib	AG	6	12	212	CTCACTGAAACAAAGAACGAGC	GCGAAGAACGTCTTGTCTCC	MF1D043TV
MF643	EST lib	AG	6	12	262	TTCTTCTTCCTCTCGCCTCC	CATAGCCGAAAACCCAGAAA	TC773
MF644	EST lib	AG	7	14	176	TCTCTACCCTTACACTCATTTTCAA	TGTCTACGAGCGATTCATGG	TC492
MF645	EST lib	AG	7	14	181	CACACACCATTTCTATCACTTCAA	ATCTAGTGGCCAACAAACCG	MF1EE95TV
MF646	EST lib	AG	8	16	219	ACGGCTCTACCTGTAACCGA	ACGTAGGACAAACAATCCGC	TC1172
MF647	EST lib	AG	9	18	193	TACCCAGAGAGAGAAGGGCA	TTTCTCGCAGCATCAAACAG	MF1BF75TV
MF648	EST lib	AGA	5	15	248	TGAAGCAAACAAAGCAGAAAGA	CGAAAGTGGTGATGTGATGC	MF1DQ56TV
MF649	EST lib	AGA	6	18	212	GTTACGCACAAACCCAGGAT	TCATCCTTCTCCATCTCATCA	MF1D031TV
MF650	EST lib	AGC	5	15	184	AACCCAAGCAACATCACTCC	TGTGAAACCAACTGGAGCAG	TC331
MF651	EST lib	AGC	6	18	200	CAGGTCCAGGTAAAAAGGCA	GCCCACTCTAGGTGCTTCAG	TC31
MF652	EST lib	AT	10	20	205	GGTCGTAGGTAAGTCGTCGC	GCCAAAAACCTATTCTGGCA	MF1EH48TV
MF653	EST lib	AT	12	24	115	ACTAAATGCAAACGGCACAC	GGCTTGAACAAAGAACCAGC	MF1AC53TVB
MF654	EST lib	CA	6	12	216	ATTTGAGGGCGAAAAAGGTT	AGCCTCAGCATTTACCTCCA	TC35
MF655	EST lib	CAA	6	18	143	CAAAACCAGCTTAGACACAACA	TGTGTAGTGACGGTTGCCAT	TC576
MF656	EST lib	CAGGGC	5	30	228	CTCCTCTTCGCTACATTCGC	GCGAGGAGTAGTTCGTTTGC	MF1BJ68TV
MF657	EST lib	CAGGGC	6	36	138	AACGCTACTCTCCATGCCAC	ACGAAGATGCTTGTGAGCCT	TC3
MF658	EST lib	CCA	8	24	130	GTGTTGAGCGGTTTGCTTTT	CTGATGGAAGATGAAATCGAA	TC862
MF659	EST lib	CT	10	20	162	TCTCACGTTCAGTTACATCGCT	CTGCCGTTGGTAGCTTCTTC	TC642
MF660	EST lib	CT	21	42	125	GCAGGTGCCCTCTCTATCTC	CGCTTAGTACCTCAGTCGCC	MF1DC68TV
MF661	EST lib	CT	6	12	171	ATTGTATAGCCGAACCGCAC	TTGGCTAGCTTCACTGTCCA	MF1AJ26TVB
MF662	EST lib	CT	6	12	182	TTCACATGGTTTTCATTTTCTACA	GAAGAGAGCCGTTGCATTTC	TC474
MF663	EST lib	CT	6	12	188	CTCTCACTCTCTCGCTGCCT	GAGATCGGGGAGGTTTTTGT	TC385
MF664	EST lib	CT	6	12	195	CTACCGAAACATGCACCTGA	GGACAGGACAGCCACAAAAT	MF1BL37TV
MF665	EST lib	CT	6	12	222	CATTTCTCTCCTCTCTCCCTCT	TTAGATCTGCGCTTGCATTG	TC457
MF666	EST lib	CT	6	12	228	ATTGGCCTATTCATCGCATC	TGATAGGAATGGCAAGGGAG	TC141
MF667	EST lib	CT	6	12	232	TCAAAAGAATCCAACCAACATTT	CCGTTCTCCTTACCGTTCTG	MF1D011TV
MF668	EST lib	CT	8	16	277	TCTACAGCTTAAAAAGAAAACACCA	CTTGTAAAAGGCACCGAAGC	TC721
MF669	EST lib	CTG	5	15	266	GTTTCGATGGTGACCTCGTT	TCTTCAGCCGGTTCATCTTT	MF1D015TV
MF670	EST lib	GA	6	12	198	GCAGGCAGGGCACTAGTTTA	CAGATTGATTTCGACTGCGA	MF1EM22TV
MF671	EST lib	GA	6	12	235	GTTTGGGGTTTCGAAGACAA	CTACCTCGAGTTCTTGCGCT	MF1B748TV
MF672	EST lib	GA	6	12	247	GGTGTCTGTGCCATCGAGAG	ATGAAGCATTGGTCTGGAGG	TC271
MF673	EST lib	GA	7	14	246	ACCGCAGCGTTCTATTTCAC	GCTTAGGGAAGCACTTGACG	TC1290
MF674	EST lib	GA	8	16	252	GAAACCTAAATCACAAATCAGCAA	TCCTCGTATCGTTTCCCAAC	TC442
MF675	EST lib	GAA	12	36	176	CGGCGAAGAAGAAGAAACAC	ATTCAATGCAGGCTTCATCC	MF1BO76TV
MF676	EST lib	GAA	5	15	176	TGACGAAATTTTTGCTGGTG	TTCGTTTTGATTTCGCAGGT	MF1BT44TV
MF677	EST lib	GAA	5	15	141	CGAGCCAGCCAAAATTAAGA	CCCTCTGGCTTTTCTTCTCC	MF1BJ82TV
MF678	EST lib	GAA	5	15	106	AGAAGAAGAAATGAAGGCAACA	GACCAACTAAGAAGCCGCAG	MF1EI61TV
MF679	EST lib	GAA	5	15	192	AACTCAGATTTGAGAAAGAGCGA	GGTGCAGATCATCAAACCCT	TC1087
MF680	EST lib	GAA	6	18	265	TGAAGCAGAGCTTGAACTGG	AGATCCAAAACTTGATGGCG	MF1BQ48TV
MF681	EST lib	GAAGGT	7	42	172	AAGATCAGCCCCAGCACTAA	TGGACCCCTATCAAGAGTCA	MF1DT30TV
MF682	EST lib	GAT	5	15	258	GTGTCTTCGCAGCTTGTTCA	CCATGGTTTCACATCCATCA	MF1D207TV
MF683	EST lib	GAT	5	15	263	CTACAGCAAAGCCTTCGACC	CGGCAAATCATTCATGTCAC	MF1DS71TV
MF684	EST lib	GCA	5	15	244	AGGGTATCCTCCTGCTGGTT	GTACATTCCGTGCTTCCCAT	TC884
MF685	EST lib	GCA	5	15	134	TGCATCCATTACAAATGCCA	AGAAGCCCCTTGCTGATGTA	MF1EQ16TV
MF686	EST lib	GCA	6	18	238	TCATGCACCGTGGTTTTAGA	ACACTGCCTTGTTTTGGACC	MF1DG27TV
MF687	EST lib	GCG	5	15	164	CGATTTCAAAAATGGTGTTGG	CGGCCATTGAAGAGAGAGAG	TC1034
MF688	EST lib	GGA	5	15	182	AGACTCGGTCAATTCGTTGG	CGAACTGCACAAAGGCACTA	TC142
MF689	EST lib	GGA	5	15	268	GAGCATCGCGGAGTACTTTC	TGGGGAGTCCAAACTAAACG	MF1CC86TV
MF690	EST lib	GGA	6	18	184	GTCAATTCGTTGGGAAGCAG	CGAACTGCACAAAGGCACTA	TC144
MF691	EST lib	GGAGAA	5	30	200	GAAACTTTTGAGGAGGCCG	AATCAGGGAGCTGTTTGCAC	TC981
MF692	EST lib	GGT	5	15	154	TTGGATTTGGCATGAACAGA	ATTCCAGTGGTGCATTTTCC	TC568
MF693	EST lib	GGT	6	18	144	AGCAGGGAAGCCTTTAGGAC	CATCAGTGTTTAGAAATCTGGGTG	MF1C154TV
MF694	EST lib	GGT	7	21	263	TGGCAAGGAACTTAACGGAC	TTTTCCCTTGGCAAATCATC	TC679
MF695	EST lib	GTT	5	15	115	ACCATCTTTGCCGTGGTTAC	ACCCACGACAACAAAGCAAT	TC956
MF696	EST lib	GTTT	5	20	134	CGCAGCACTGAGAAGAAGTG	AACAGACCAACCCGACAAAG	MF1CZ96TV
MF697	EST lib	TA	11	22	247	GGCCAAGAAAGTTGACGAAG	GGAAACAAAACAGTAACACTGCC	TC1048
MF698	EST lib	TA	12	24	198	CGGTCACCGGAATAAAGATG	GAAGCCAGAATCGATCAGTG	TC315
MF699	EST lib	TA	6	12	239	CAAGCCAGTGCAAGATTCAA	GGAAGTCTTATTGCACGTGGT	TC59
MF700	EST lib	TA	9	18	114	GCTGGTTTCAAAAGAGGCTG	AAGAGACAGGTAACTGAGTAGTGGTG	TC1308
MF701	EST lib	TAT	5	15	270	CATTGGGGCTTCTTCCTACA	CAGGGCAAAAGGTAAACCAA	TC1225
MF702	EST lib	TATC	5	20	177	AAACGGCAGGTTCTCGTTTA	CAATAAAACCGCAGCGAAAT	MF1EM80TV
MF703	EST lib	TATT	5	20	188	CCGATCAGAGTGGAGGAGAG	CAGCAGCTGCACAAACTCTT	TC585
MF704	EST lib	TC	11	22	174	TCTCCATTATCATCACTGCCC	CCACCATTTCTTCGTACCGT	MF1D152TV
MF705	EST lib	TC	17	34	154	GCTCGTCAATCAAACCCCTA	CGAGATCACGAACAAAAGCA	MF1EO85TV
MF706	EST lib	TC	6	12	141	TCTTCAGTTACAGTCTCCAGATCC	CACCAAAAAGGTAGCCCAAA	TC684
MF707	EST lib	TC	6	12	157	CCTGAAAAAGAAAACTATCAGAGAGG	GATGATCAGGAAGATCGGGA	TC1160
MF708	EST lib	TC	6	12	166	GAAAGGAAGAATGCAGCACC	TATGTTGACGAAGGCGTCTG	MF1BM48TV
MF709	EST lib	TC	6	12	183	AGCTGGGGTGAGCTCTGTAA	AGCGCGAGAGAACAACAAAT	TC815
MF710	EST lib	TC	6	12	184	ACCCGTTTCTCGATCCTTTT	ACACGGTTCTCCACAACCTC	TC668
MF711	EST lib	TC	6	12	252	GGTTCTTCTTCCACAAAAACAT	ACCAACTCAGGCCTCATCAC	TC466
MF712	EST lib	TC	6	12	267	CAAATCATATACACACCACACTCTAA	ACCGACACGAAATCTGGAAG	TC716
MF713	EST lib	TC	7	14	101	GACACGAATCATATACACCACACTC	AGCCATGGATTGAAGAATGG	MF1A285TVB
MF714	EST lib	TC	7	14	238	GGCACCTCTCAGCACCTCT	GGGAGTTAGCATTGTGGTGG	TC1126
MF715	EST lib	TC	8	16	139	GGGGTGGAGCTAACATATTCA	AAGACCAATGGGTTTGAACG	MF1CZ32TV
MF716	EST lib	TC	8	16	156	CACCCCGAAACAAGAGAAAA	TAACACAACAATCCTCGGCA	MF1E330TV
MF717	EST lib	TC	8	16	213	CCAGTTGAAAACCTCAACGAA	GGAATTAAGCTTCAACGCCA	MF1BL10TV
MF718	EST lib	TCA	6	18	269	AGCATGTATCCGACTGGGAG	AGCATGTATCCGACTGGGAG	TC270
MF719	EST lib	TCC	5	15	200	GGTGCCAACAGCTGGTAACT	TACCCGGGTCCTCCCTATAC	MF1EV39TV
MF720	EST lib	TCT	6	18	253	TGGTACATCAGTCCATCGGT	ACAAATACTGCCAGGGATGC	MF1EQ05TV
MF721	EST lib		6	12	257	CGGTCAGAAGACTCAGGAGG	AACCTCCTCACAAGAAGGCA	TC108
MF722	EST lib	TG	7	14	158	CTGAGGGTCATTGATTGATCTG	AACCTCCTCACAAGAAGGCA	TC109
MF723	EST lib	TGA	5	15	164	TAAGCCCAATGTTGGAAAGG	CCTCACTAGACCATGCAGATGA	MF1DW45TV
MF724	EST lib	TGC	5	15	211	AACGCTCTGCTTACGGTGTT	CCTCGCTGAAACCTTCTACG	TC500
MF725	EST lib	TGC	5	15	128	ATCGCCTGATTTGCGTTTAG	CAGTGTATTCCGGAAGCAGG	TC759
MF726	EST lib	TGG	5	15	187	CCGACCAATATGGTATTCCG	CCACCTCCATGTGTCTGTTG	MF1E696TV
MF727	EST lib	TGT	6	18	158	CTTATGCCGCTGTCTGTCAA	TTTTCGGAAACAAGACACCC	TC460
MF728	EST lib	TTA	6	18	155	TGGGACATGAGAGGATGTCA	GCACACACATCACACTTCCA	MF1ES43TV
MF729	EST lib	TTC	5	15	225	TTGCTCAAGTCCCTTTTTCG	GCTTGTGAGAATCGAGGACC	TC1179
MF730	EST lib	TTC	5	15	261	ACTGGACCGGTGAGAAAGTG	CTCGGCGTCATTCTCCTTAG	MF1CZ94TV
MF731	EST lib	TTC	6	18	274	AAAAGCTTGGATTGTGGCAA	AGGACCCCAGCAGCTAATCT	MF1CY57TV
MF732	EST lib	TTG	5	15	157	ACAGAGGATTGCTGTCGCTT	AAAAACCACAAACATCAAACAAGA	MF1CB46TV
MF733	EST lib	TTG	5	15	186	AGGTGACATTAAACAGGCCG	CAACAGGACATTTTAACACCAA	TC110
MF734	EST lib	TTG	5	15	157	ACAGAGGATTGCTGTCGCTT	AAAAACCACAAACATCAAACAAGA	MF1AK36TVB
MF735	MF lib	GTT	6	18	146	CGGTGTTTTCCGTTAAGTGG	AAGAAACATGGCGTTTCACC		527_15_14221399_5489_44078_068.ab1
MF736	MF lib	TTA	6	18	162	ATCCCAGACCGGAAAAGTCT	AAACGCACTCATTCCCAATC		803_2_14224512_5489_44081_053.ab1
MF737	MF lib	TA	15	30	163	CGACCAGCAGGTAAGCATTT	TCGAACTCATCTTCTCAGCAA		527_15_14221151_5489_44078_046.ab1
MF738	MF lib	TA	10	20	164	CATCAACAGGTTTGAGAGTTGAG	TGTCTGCTCAAGTCAAGTTCG		803_6_14286568_5489_44251_064.ab1
MF739	MF lib	GT	10	20	166	TCGTTTGGTTTGGGATTAGG	AAAGAGCAGCATTCCGAAGA		803_2_14224265_5489_44082_031.ab1
MF740	MF lib	AT	15	30	168	HEX-TCAAACTAAAACAATCATACACATTGA	TGACTATAACATGAAACATAACCGTAAA		803_3_14224657_16654_44086_063.ab1
MF741	MF lib	TA	26	52	177	TCATGCAAACATATTCATTGTGA	TGGTGTTGTCTTGAACAATCG		527_13_14219241_5489_43926_089.ab1
MF742	MF lib	AT	15	30	184	CAAACGATCCTATCTCGGATAAA	ACTCGCAAATTCAAATCCAA		527_12_14177753_16654_43751_070.ab1
MF743	MF lib	AG	25	50	185	TGAAAAAAAAAATAGGTGGATGG	TTGCAACAGACGTCATATTTTGT		527_15_14221361_5489_44080_021.ab1
MF744	MF lib	AT	9,7	32	186	TGTTTCGAAAGAAAAAGTTTGGA	TTTTTGGAGGGATCAACTGAC		527_14_14219699_16654_44014_088.ab1
MF745	MF lib	TCT	6	18	189	ACGTTACGGCATGAACTTCC	TTCCTGGGACTTTGATCAGG		803_5_14286331_16654_44240_074.ab1
MF746	MF lib	TTAT	7	28	190	GGCCAAAATTTCGGTTAAGA	TTTCAATCATATTGGATTTTTATAGGA		527_13_14219160_5489_43927_061.ab1
MF747	MF lib	TA	10	20	190	CCTGCGCTAAGTTCTTCTGG	GGTTGGTCCCTCAGTGAAAA		527_14_14219477_5489_43930_079.ab1
MF748	MF lib	AT	33	66	190	CAAAGGTTTTTCTTTTCTAATTTCA	GGAATTACACTACAATCCCTCGTT		527_15_14221306_5489_44077_088.ab1
MF749	MF lib	AT	5	10	191	GCTCATCGGTCCCATAAAAA	CATAATGGAAGAAAGTGGGCTTA		803_3_14224792_16654_44085_025.ab1
MF750	MF lib	AT	10	20	196	ACTGCCCGATGGTATGGTAA	TTTGGAATGCCTTGGACATC		803_1_14221084_16654_44037_065.ab1
MF751	MF lib	ACAT	5	20	198	CTGGAAAGACACACACACACA	AAAAGTTTAAAGCAAGGGAATTG		527_2_13917880_5489_41755_081.ab1
MF752	MF lib	CAA	6	18	200	CCCATACCCAATGCAATCTT	AAGAACTTTCCCCGGTGTTC		803_3_14224676_16654_44087_047.ab1
MF753	MF lib	TAA	21	42	200	AACCTTCCTTTATTCTTCTTTCTCA	CAAAACAGCTCTAACCAAAACTG		803_6_14286912_5489_44251_082.ab1
MF754	MF lib	AT	26	52	210	TTGGGCCAATTATGGAGCAT	TTTTGCAGTATTGTGCATATTAAAGTT		527_11_14152826_5489_43271_059.ab1
MF755	MF lib	AT	11	22	218	CAATATAATAGATGCAAAACACGGTA	TTGTGATTTGACGATCCGATA		527_14_14219592_16654_44013_059.ab1
MF756	MF lib	AT	10	20	220	TACGCGTGCAAGATGGATTA	TGCTCGCTCGAATAAATCAA		803_6_14286873_5489_44248_033.ab1
MF757	MF lib	AT	10	20	229	TCGATTGGACCGTGATACCT	ATCCGGAAGGTTGGAGAAAT		527_15_14221240_5489_44077_025.ab1
MF758	MF lib	AT	12	24	229	ACATGGAGGACCTGTGGTGT	TTGTTAATTTCTTTCGGCATGT		803_6_14286630_5489_44249_027.ab1
MF759	MF lib	AT	22	44	230	GCGTAGCCCTTACTAGATTGC	GAAGTGTTTATGAGGATATATATGATTATTTT		803_5_14286209_16654_44238_077.ab1
MF760	MF lib	AT	12	24	232	AAACATCACCACTCACCACAG	TTCACGGTTTCTAAAGAGAGTGC		527_14_14219634_16654_44013_026.ab1
MF761	MF lib	AT	18	36	232	GGGTACTGCAGGTGCAATTT	ACATTGAAAAATGAAAACGACA		803_5_14286277_16654_44240_059.ab1
MF762	MF lib	TA	14	28	232	CCGGAATATGTCCATAATGTAACTT	TTTGCCTGGCATACTATTTTGA		803_6_14286874_5489_44249_033.ab1
MF763	MF lib	TAA	4	12	238	CCCTTTCATTTTTAGTCCCTTTG	CCAATCGATGTGGGATTAAA		527_13_14219161_5489_43928_061.ab1
MF764	MF lib	AT	9	18	245	TGAAAAGATCCCTTTGTCACC	GCGTTAGTTTTGGCACTCTTC		527_14_14219777_16654_44014_019.ab1
MF765	MF lib	AT	23	46	245	GGATGTCACATATTTCACCTTCAT	AAACGAGTGAATAAGGGCTATG		803_4_14267407_16654_44216_018.ab1
MF766	MF lib	GA	4	8	246	CGAAGAAGCAGTAATCTTAAAGCA	CAATTTGTTTTCCCTCCACA		527_15_14221422_5489_44079_068.ab1
MF767	MF lib	GT,AT	4,8	24	247	TGCCTGAAGTATATCTCTGAACCA	CAAAAAGGGAATCAGCCATT		527_13_14219268_5489_43925_007.ab1
MF768	MF lib	AC,AT	14,18	64	252	TTTTTCCACGGGTTTTTGTTA	GAGGCAGAAGAACCCAAAAA		803_2_14224276_5489_44081_079.ab1
MF769	MF lib	AT	21	42	272	ACCCAATACCAAAACGTCCA	ACTCCGCAATCAAGTGATCC		803_5_14286451_16654_44238_068.ab1
MF770	MF lib	AT	19	38	273	CTGGAAAGAACAAAATTTTACATGG	ACATATCGAGTTGGTTAAAGCTAGA		527_14_14219670_5489_43929_072.ab1
MF771	MF lib	TA	9	18	279	ATCTGCTCTTCCCTTGTTCG	TTGAAAGTTTAAAACCGCTTACA		803_2_14224559_5489_44082_036.ab1
MF772	MF lib	TA	22	44	284	GGAAAGGTCCGACTCTAGTGAA	CCAAACAGGAGCATCCAAAT		527_14_14219505_16654_44014_095.ab1
MF773	MF lib	AG	37	74	291	CCAAGGCCTCCTTCATGTTA	TTTGAAATCCGCTTTGGAAG		803_4_14267141_16654_44214_027.ab1
MF774	MF lib	AAT	10	30	295	CAACCACAAAGAACCCGACA	CTCCACTCCCTCCGGTCTC		527_2_13917828_5489_41755_057.ab1
MF775	MF lib	TA	26	52	296	GACGGTTAGGGATGGCATAA	CAATGTTTCTGCAGATGTGAAT		803_6_14286625_5489_44248_011.ab1
MF776	MF lib	CT	9	18	299	TTACATGTGGGCAAGGGAAG	TTACATGTGGGCAAGGGAAG		527_2_13917839_16654_41885_040.ab1
MF777	MF lib	AT	13	26	300	TTTCAGCCAACAAATGAAGG	CCCAAAATCTTATAGAGTTCCCACT		803_3_14224995_16654_44086_050.ab1
MF778	MF lib	TA	39	78	311	TCAGCATAAACCCCAGAAGG	TTGGGAAGTTAAAAGCTTGG		527_2_13917795_5489_41755_080.ab1
MF779	MF lib	AT	14	28	313	AGTGGATAATAGTTTGGATTTTAAGTCT	ACTTTATATGATTCTTAAACTTATAGTTTATCA		527_11_14152839_5489_43271_058.ab1
MF780	MF lib	A,AT	17,10	54	317	TGAATGAACCCGCTCTCTAA	TGTATCATCTAACTTCATTCCAAACA		527_14_14219829_16654_44014_033.ab1
MF781	MF lib	TA	18	36	324	AAAGACCAACTCAAGTCCAAGTC	CCAACCTGAATGAATTAGATGAA		803_1_14220723_16654_44036_064.ab1
MF782	MF lib	AT	15	30	328	TCTTGTAGTGCGGCTTTTTG	TGGATACGATAACCCAAACCTT		803_5_14286488_16654_44239_018.ab1
MF783	MF lib	AT	24	48	345	TTTCCACACCATTGCTTTCA	TGTGTCTTATAGTGATCATGATGTTTT		527_15_14221440_5489_44077_049.ab1
MF784	MF lib	AT	22	44	345	GGATAGTGAATGATAACTTGTCCTAA	CGGTACACTGTCAAGGCACA		803_4_14267381_16654_44214_017.ab1
MF785	MF lib	GA	25	50	347	GCGAGAGAGGGAGAGAGAGAG	TTGTAAATTAGCAGAACCCTACCA		527_15_14221360_5489_44079_021.ab1
MF786	MF lib	AT	16	32	357	GAACAGCATTGTCAGCCTGT	GTCCTCAAATCCTCCGTCAA		803_2_14224444_5489_44398_073.ab1
MF787	MF lib	ATT	23	46	357	TCATTCGGAACCTCCATCTC	TTCTATAAATGGAGATCTAACAACCA		803_6_14286635_5489_44248_044.ab1
MF788	MF lib	TA	24	48	358	GGGTTGTTGTTGGGTTTGAT	AAGCTGGCCAGTTGATCTATAA		527_15_14221473_5489_44080_081.ab1
MF789	MF lib	AT	13	26	368	ACAAACGCAGCAAGTGTCAA	GGTAATGCTTTAAGTAAGCCATGATA		803_5_14286502_16654_44239_081.ab1
MF790	MF lib	A,AT	17,10	54	378	TGAATGAACCCGCTCTCTAATG	CCCAGAATCAACGCAACAGA		527_4_13995510_5489_42083_047.ab1
MF791	MF lib	AT,TA	15,6	42	379	CATTAGCAACTTGTATTTTTGGTAAC	TCTCCAAAGCTCTGGGTATTG		803_6_14286902_5489_44251_049.ab1
MF792	MF lib	AT	10	20	387	TCTATGGAAGTGAAGACTTTAGGC	TTGATAACATTTTGGGAGACAAA		527_14_14219558_5489_43929_012.ab1
MF793	MF lib	CT,CT	13,7	40	393	TGTTCGTGTTCGTGTTCGTT	GCTCATGACCGGCACTAAAC		803_4_14267392_16654_44215_050.ab1
MF794	MF lib	AT	25	50	394	TGAGCATCGACTTCAGGTTG	TTGAAGATTTGCTACATGTCTTATG		803_5_14286214_16654_44239_093.ab1
MF795	MF lib	AGG,AGA	5,4	27	431	TTCCCCAATGTTTGCAGTTG	AGCAAGCCATTACCGAGAGG		527_2_13917796_16654_41885_095.ab1
MF796	MF lib	TAT	12	24	450	GGTTATCAATGAGTTTTTATTTTCTGA	ATGGCGGGTGGTATCCATTA		803_3_14224667_16654_44086_096.ab1
	EST library=cDNA library prepared from L. alba ssp. alba (MF164)immature embryos
	MF library=methylation-filtration library prepared from L. alba ssp. versicolor leaf
