# Supplementary material for: Genes affecting novel seed constituents in Limnanthes alba Benth: transcriptome analysis of developing embryos and a new genetic map of meadowfoam
Source: PeerJ. 2015 May 19;3:e915. doi: 10.7717/peerj.915 (PMC4451031; doi:10.7717/peerj.915)
Supplement: Table S4 [file peerj-03-915-s005.xls]

## Sheet: Sheet1
Primers used in candidate gene mapping
Gene	Contig ID (TIGR)	Forward primer	Forward primer sequence	Reverse primer	Reverse primer sequence
KCS11	Contig 248	KCS1F	AGA CAA ACA TCA CGA CGC TTG G	KCS4R	AGA CAA CAG CAA CCG GAA ACT G
Δ5DS	Contig 104	DS221F	CTT TGC TTA CTG TGG CTC TCT C	DS5R	CAT CTC TTT CTG TAT CGA CGA AC
Δ5DS	Contig 104	DS218F	GAA GAA GAG CTT CAG ACT CTC	DS219R	GCC ATC GCT GCA AGA GCA TG
LPAT2	Contig 909	LPAT432F	TGG TGT TGC AAA GAA AGA GG	LPAT893R	AAA CAG GTG AAT GCG AAA GG
DGAT2	Contig 384	DGAT3F	TGG TGG GTT TCC GGG CAC A	DGAT4R	CAG TAA ACT GGG ACC AAA GGT GA
TGG	Contig 572	TGG436F	CCC GAA TGC TAA GAC AGA TCC	TGG792R	ATT CCG AAG CGG ACA GTA TG
ESM	Contig 183	ESM5F	CTT TGC TGT AGC TGA TGC TAC TA	ESM2R	CCT AGC TCC AGC TTG GTA CAG
ESM	Contig 184	ESM5F	CTT TGC TGT AGC TGA TGC TAC TA	ESM4R	TCCT TGC TCC AGC TCT ATA CAA
CYP79A	N.A.	CYP203F	GAR GAR ATH GAR CAY GTN GA	CYP211R	TTR AAN GGN GCN ACN GGR TG
CYP79B	N.A.	CYP201F	GAR CAY ATG GAN GCN ATG TT	CYP217R	GAG TTT AGG AAT GTC AGA TTC TTG
